# Supplementary material for: Selected Pharmaceuticals in Different Aquatic Compartments: Part I—Source, Fate and Occurrence
Source: PubMed Central journal article supplement (PMC7179177; doi:10.3390/molecules25051026), 2020-02-25
Supplement: molecules-25-01026-s001.pdf [file molecules-25-01026-s001.pdf]

**Supporting information for**  
**Selected pharmaceuticals in different aquatic compartments: Part I -**  
**source, fate and occurrence.**

André M.P.T. Pereira <sup>a,\*</sup>, Liliana J.G. Silva <sup>a</sup>, Célia S.M. Laranjeiro <sup>a</sup>, Celeste Lino <sup>a</sup>,  
Angelina Pena <sup>a</sup>

<sup>a</sup> *LAQV, REQUIMTE, Laboratory of Bromatology and Pharmacognosy, Faculty of  
Pharmacy, University of Coimbra, Polo III, Azinhaga de St<sup>a</sup> Comba, 3000-548  
Coimbra, Portugal*

**\*Corresponding author:**

LAQV, REQUIMTE, Group of Bromatology, Pharmacognosy and Analytical Sciences,  
Faculty of Pharmacy, University of Coimbra

Pólo das Ciências da Saúde, Azinhaga de Santa Comba, 3000-548 Coimbra, Portugal.

Tel: +351239488400

Fax : +351239827126

**E-mail addresses:**

amptpereira@gmail.com (A.M.P.T. Pereira), ljgsilva@hotmail.com (L.J.G. Silva),  
cmlino@ci.uc.pt (C. Lino), apena@ci.uc.pt (A. Pena)

**Table S1. Physicochemical properties of the selected pharmaceuticals (adapted from Chemspider, Drugbank, Pubchem and ECOSARv1.11).**

| Therapeutic Group/Compound | Cas Number | Structural Formula                                                                                                                                                 | Molecular Weight | pKa (DB)   | log K <sub>ow</sub> | log D <sub>ow</sub> (pH 7.4) | log K <sub>oc</sub> (pH 7.4) | Solubility (mg L <sup>-1</sup> ) |
|----------------------------|------------|--------------------------------------------------------------------------------------------------------------------------------------------------------------------|------------------|------------|---------------------|------------------------------|------------------------------|----------------------------------|
| Anxiolitics                |            |                                                                                                                                                                    | 307.40–321.16    | 5.1–18.3   | 2.41–3.87           | 2.49–3.06                    | 2.73–3.01                    | 16.6–32.4                        |
| Alprazolam (ALP)           | 28981-97-7 | 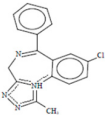<br>C <sub>17</sub> H <sub>13</sub> ClN <sub>4</sub>                              | 308.77           | 5.1/18.3   | 3.87                | 2.63                         | 2.81                         | 32.4                             |
| Lorazepam (LOR)            | 846-49-1   | <br>C <sub>15</sub> H <sub>10</sub> Cl <sub>2</sub> N <sub>2</sub> O <sub>2</sub> | 321.16           | 10.6       | 2.41                | 2.49                         | 2.73                         | 16.6                             |
| Zolpidem (ZOL)             | 82626-48-0 | <br>C <sub>19</sub> H <sub>21</sub> N <sub>3</sub> O                             | 307.40           | 5.65       | 3.85                | 3.06                         | 3.01                         | 31.3                             |
| Antibiotics                |            |                                                                                                                                                                    | 331.35–749.00    | 5.76–12.46 | 0.01–3.24           | -2.23–1.69                   | 0–2.33                       | 217–1350                         |

| Therapeutic Group/Compound | Cas Number | Structural Formula                                                                                                                                  | Molecular Weight | pKa (DB)   | log K <sub>ow</sub> | log D <sub>ow</sub> (pH 7.4) | log K <sub>oc</sub> (pH 7.4) | Solubility (mg L <sup>-1</sup> ) |
|----------------------------|------------|-----------------------------------------------------------------------------------------------------------------------------------------------------|------------------|------------|---------------------|------------------------------|------------------------------|----------------------------------|
| Azithromycin (AZI)         | 83905-01-5 | 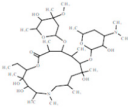<br>C <sub>38</sub> H <sub>72</sub> N <sub>2</sub> O <sub>12</sub> | 749.00           | 9.57/12.43 | 3.24                | 1.36                         | 1.24                         | 514                              |
| Ciprofloxacin (CIP)        | 85721-33-1 | <br>C <sub>17</sub> H <sub>18</sub> FN <sub>3</sub> O <sub>3</sub> | 331.35           | 5.76/8.68  | 0.01                | -2.23                        | 0                            | 1350                             |
| Clarithromycin (CLA)       | 81103-11-9 | <br>C <sub>38</sub> H <sub>69</sub> NO <sub>13</sub>               | 747.97           | 8.38/12.46 | 3.16                | 0.67                         | 2.33                         | 217                              |
| Erythromycin (ERY)         | 114-07-8   | <br>C <sub>37</sub> H <sub>67</sub> NO <sub>13</sub>              | 733.95           | 8.38/12.44 | 3.06                | 1.69                         | 1.96                         | 459                              |
| Lipid regulators           |            |                                                                                                                                                     | 250.34–418.58    | 3.83–14.91 | 4.25–5.19           | -0.11–4.60                   | 0–3.88                       | 1.5–27.8                         |

| Therapeutic Group/Compound                      | Cas Number | Structural Formula                                                                                                                                   | Molecular Weight | pKa (DB)  | log K <sub>ow</sub> | log D <sub>ow</sub> (pH 7.4) | log K <sub>oc</sub> (pH 7.4) | Solubility (mg L <sup>-1</sup> ) |
|-------------------------------------------------|------------|------------------------------------------------------------------------------------------------------------------------------------------------------|------------------|-----------|---------------------|------------------------------|------------------------------|----------------------------------|
| Bezafibrate (BEZ)                               | 41859-67-0 | 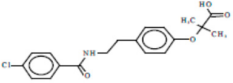<br>C <sub>19</sub> H <sub>20</sub> ClN <sub>1</sub> O <sub>4</sub> | 361.83           | 3.83      | 4.25                | -0.11                        | 0                            | 1.5                              |
| Gemfibrozil (GEM)                               | 25812-30-0 | <br>C <sub>15</sub> H <sub>22</sub> O <sub>3</sub>                  | 250.34           | 4.42      | 4.77                | 1.58                         | 1.04                         | 27.8                             |
| Simvastatin (SIM)                               | 79902-63-9 | <br>C <sub>25</sub> H <sub>38</sub> O <sub>5</sub>                  | 418.58           | 14.91     | 5.19                | 4.60                         | 3.88                         | 12.2                             |
| Antiepileptic                                   |            |                                                                                                                                                      |                  |           |                     |                              |                              |                                  |
| Carbamazepine (CAR)                             | 298-46-4   | <br>C <sub>15</sub> H <sub>12</sub> N <sub>2</sub> O              | 236.28           | 15.96     | 2.45                | 2.28                         | 2.62                         | 152                              |
| Selective serotonin reuptake inhibitors (SSRIs) |            |                                                                                                                                                      | 291.06–329.14    | 9.05–10.5 | 1.22–4.82           | 0.5–3.14                     | 0.37–2.16                    | 0.1–58.8                         |

| Therapeutic Group/Compound                  | Cas Number | Structural Formula                                                                  | Molecular Weight | pKa (DB) | log K <sub>ow</sub> | log D <sub>ow</sub> (pH 7.4) | log K <sub>oc</sub> (pH 7.4) | Solubility (mg L <sup>-1</sup> ) |
|---------------------------------------------|------------|-------------------------------------------------------------------------------------|------------------|----------|---------------------|------------------------------|------------------------------|----------------------------------|
| Citalopram (CIT)                            | 59729-33-8 | 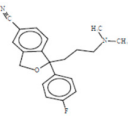   | 324.16           | 9.78     | 1.39                | 1.27                         | 1.10                         | 58.8                             |
|                                             |            | C <sub>20</sub> H <sub>21</sub> N <sub>2</sub> O                                    |                  |          |                     |                              |                              |                                  |
| Desmethylcitalopram (N-Cit)<br>(metabolite) | 62498-67-3 |    | 310.15           | 10.50    | 3.53                | 0.50                         | 0.37                         | 57.0                             |
|                                             |            | C <sub>19</sub> H <sub>19</sub> N <sub>2</sub> O                                    |                  |          |                     |                              |                              |                                  |
| Escitalopram (ESC)                          |            |                                                                                     |                  |          |                     |                              |                              |                                  |
| Fluoxetine (FLU)                            | 54910-89-3 |    | 309.13           | 9.80     | 1.22                | 1.75                         | 1.18                         | 1.7                              |
|                                             |            | C <sub>17</sub> H <sub>18</sub> F <sub>3</sub> NO                                   |                  |          |                     |                              |                              |                                  |
| Norfluoxetine (Nor-FLU)<br>(metabolite)     | 83891-03-6 |  | 295.12           | 9.05     | 4.18                | 2.23                         | 1.84                         | 35.7                             |
|                                             |            | C <sub>16</sub> H <sub>16</sub> F <sub>3</sub> NO                                   |                  |          |                     |                              |                              |                                  |

| Therapeutic Group/Compound                    | Cas Number               | Structural Formula                                                                                               | Molecular Weight | pKa (DB)  | log K <sub>ow</sub> | log D <sub>ow</sub> (pH 7.4) | log K <sub>oc</sub> (pH 7.4) | Solubility (mg L <sup>-1</sup> ) |
|-----------------------------------------------|--------------------------|------------------------------------------------------------------------------------------------------------------|------------------|-----------|---------------------|------------------------------|------------------------------|----------------------------------|
| Paroxetine (PAR)                              | 61869-08-7               | 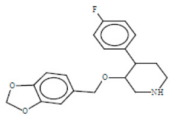<br><chem>C19H20FNO3</chem>     | 329.14           | 10.30     | 1.37                | 1.46                         | 1.16                         | 35.3                             |
| Sertraline (SER)                              | 87857-41-8<br>79617-96-2 | <br><chem>C17H17Cl2N</chem>     | 305.07           | 9.85      | 1.37                | 3.14                         | 2.16                         | 0.1                              |
| Desmethylsertraline (Nor-SER)<br>(metabolite) | 87857-41-8               | <br><chem>C16H15Cl2N</chem>     | 291.06           | 9.41      | 4.82                | 2.83                         | 2.13                         | 10.6                             |
| <b>Anti-inflammatories</b>                    |                          |                                                                                                                  | 109.13–312.15    | 4.0–10.46 | 0.24–4.02           | 0.16–1.37                    | 0.29–1.60                    | 4.5–101<br>200                   |
| Diclofenac (DIC)                              | 15307-86-5               | <br><chem>C14H11Cl2NO2</chem> | 296.15           | 4.00      | 4.02                | 1.37                         | 0.71                         | 4.5                              |

| Therapeutic Group/Compound                         | Cas Number | Structural Formula                                                  | Molecular Weight | pKa (DB)   | log K <sub>ow</sub> | log D <sub>ow</sub> (pH 7.4) | log K <sub>oc</sub> (pH 7.4) | Solubility (mg L <sup>-1</sup> ) |
|----------------------------------------------------|------------|---------------------------------------------------------------------|------------------|------------|---------------------|------------------------------|------------------------------|----------------------------------|
| 4-hydroxydiclofenac (4-OH-DIC)<br>(metabolite)     | 64118-84-9 | <br>C <sub>14</sub> H <sub>11</sub> Cl <sub>2</sub> NO <sub>3</sub> | 312.15           | -          | 3.18                | 1.18                         | 0.59                         | 17.9                             |
| Ibuprofen (IBU)                                    | 15687-27-1 | <br>C <sub>13</sub> H <sub>18</sub> O <sub>2</sub>                  | 206.29           | 4.90       | 3.80                | 0.45                         | 0.29                         | 68.4                             |
| Naproxen (NAP)                                     | 22204-53-1 | <br>C <sub>14</sub> H <sub>14</sub> O <sub>3</sub>                  | 230.3            | 4.20       | 3.50                | 0.45                         | 0.47                         | 51.1                             |
| Paracetamol (PARA)                                 | 103-90-2   | <br>C <sub>8</sub> H <sub>9</sub> NO <sub>2</sub>                   | 151.17           | 9.50       | 0.27                | 0.40                         | 1.60                         | 4150                             |
| 4-aminophenol (4-PARA)<br>(transformation product) | 123-30-8   | <br>C <sub>6</sub> H <sub>7</sub> NO                                | 109.13           | 5.48/10.46 | 0.24                | 0.16                         | 1.46                         | 101 200                          |

| Therapeutic Group/Compound                   | Cas Number | Structural Formula                                                                                         | Molecular Weight | pKa (DB) | log K <sub>ow</sub> | log D <sub>ow</sub> (pH 7.4) | log K <sub>oc</sub> (pH 7.4) | Solubility (mg L <sup>-1</sup> ) |
|----------------------------------------------|------------|------------------------------------------------------------------------------------------------------------|------------------|----------|---------------------|------------------------------|------------------------------|----------------------------------|
| Hormones                                     |            |                                                                                                            | 270.37–296.41    | 10.33    | 3.43–4.12           | 3.38–3.87                    | 3.21–3.48                    | 3.9–21.3                         |
| Estrone (E1)<br>(natural hormone/metabolite) | 53-16-7    | 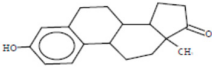<br><chem>C18H22O2</chem> | 270.37           | 10.33    | 3.43                | 3.38                         | 3.21                         | 3.9                              |
| 17β-estradiol (E2)                           | 50-28-2    | <br><chem>C18H24O2</chem> | 272.39           | 10.33    | 3.94                | 3.62                         | 3.34                         | 21.3                             |
| 17α-ethinylestradiol (EE2)                   | 57-63-6    | <br><chem>C20H24O2</chem> | 296.41           | 10.33    | 4.12                | 3.87                         | 3.48                         | 6.8                              |



**Table S2. Occurrence of pharmaceuticals in wastewaters influents (WWIs).**

| Pharmaceutical     | Country  | Year      | Sampling Type/Locations | Number Of Samples | Method         | LOD/LOQ (ng L <sup>-1</sup> ) | Frequency (Highest Value) (%) | Average (Highest Value) (ng L <sup>-1</sup> ) | Maximum (Highest Value) (ng L <sup>-1</sup> ) | Reference |
|--------------------|----------|-----------|-------------------------|-------------------|----------------|-------------------------------|-------------------------------|-----------------------------------------------|-----------------------------------------------|-----------|
| <b>Anxiolytics</b> |          |           |                         |                   |                |                               |                               |                                               |                                               |           |
| Alprazolam (ALP)   | Belgium  | 2013      | TP/2                    | 10                | SPE-LC-HRMS    | 18/60                         | 0                             | ND                                            | ND                                            | [1]       |
|                    | China    | 2011      | GS/3                    | 3                 | SPE-LC-MS/MS   | NA                            | 0                             | ND                                            | ND                                            | [2]       |
|                    | China    | 2011      | GS/3                    | 19                | SPE-LC-MS/MS   | NA/6                          | 5                             | <LOQ                                          | <LOQ                                          | [3]       |
|                    | China    | 2014      | TP/5                    | 5                 | SPE-LC-MS/MS   | NA/0.1                        | 100                           | 7.6                                           | 8.6                                           | [4]       |
|                    | India    | 2013      | GS/2                    | 7                 | SPE-LC-MS/MS   | NA/NA                         | 14.5                          | 20.5                                          | 69                                            | [5]       |
|                    | Portugal | 2009      | GS/2                    | 2                 | SPE-LC-MS/MS   | 1/5                           | 0                             | ND                                            | ND                                            | [6]       |
|                    | Portugal | 2011      | TP/1                    | 7                 | SPE-LC-MS/MS   | NA                            | 100                           | 32.3                                          | 49.1                                          | [7]       |
|                    | Portugal | NA        | TP/1                    | 48                | SPE-LC-MS      | NA                            | 35                            | NA                                            | 4705                                          | [8]       |
|                    | Spain    | 2008/2009 | TP/3                    | 42                | SPE-UPLC-MS/MS | 0/33                          | 0                             | ND                                            | ND                                            | [9]       |
|                    | Spain    | 2008/2009 | TP/3                    | 42                | SPE-LC-MS/MS   | NA/30                         | 0                             | ND                                            | ND                                            | [9]       |
|                    | Spain    | 2009      | TP/3                    | 14                | SPE-LC-MS/MS   | NA/30                         | 0                             | ND                                            | ND                                            | [9]       |
| USA                | 2013     | TP/2      | 14                      | SPE-LC-MS/MS      | NA             | 100                           | 6                             | 6                                             | [10]                                          |           |
|                    |          |           |                         |                   |                |                               | 29.5(100)                     | 6.0(32.3)                                     | 403.1(4705.0)                                 |           |
| Lorazepam (LOR)    | China    | 2011      | GS/3                    | 19                | SPE-LC-MS/MS   | NA/55                         | 63                            | <LOQ                                          | <LOQ                                          | [3]       |
|                    | China    | 2011      | GS/3                    | 3                 | SPE-LC-MS/MS   | NA                            | 0                             | ND                                            | ND                                            | [2]       |

| Pharmaceutical     | Country       | Year      | Sampling Type/Locations | Number Of Samples | Method         | LOD/LOQ (ng L <sup>-1</sup> ) | Frequency (Highest Value) (%) | Average (Highest Value) (ng L <sup>-1</sup> ) | Maximum (Highest Value) (ng L <sup>-1</sup> ) | Reference |
|--------------------|---------------|-----------|-------------------------|-------------------|----------------|-------------------------------|-------------------------------|-----------------------------------------------|-----------------------------------------------|-----------|
|                    | China         | 2014      | TP/5                    | 5                 | SPE-LC-MS/MS   | NA/4.8                        | 100                           | 35.8                                          | 40.7                                          | [4]       |
|                    | India         | 2013      | GS/2                    | 7                 | SPE-LC-MS/MS   | NA/NA                         | 78.5                          | 36                                            | 95                                            | [5]       |
|                    | International | NA        | NA                      | NA                | NA             | NA                            | NA                            | ND                                            | ND                                            | [11]      |
|                    | Portugal      | 2009      | GS/2                    | 2                 | SPE-LC-MS/MS   | 2/7                           | 0                             | ND                                            | ND                                            | [6]       |
|                    | Portugal      | 2011      | TP/1                    | 7                 | SPE-LC-MS/MS   | NA                            | 100                           | 299                                           | 446                                           | [7]       |
|                    | Portugal      | NA        | TP/1                    | 48                | SPE-LC-MS      | NA                            | 0                             | ND                                            | ND                                            | [8]       |
|                    | Spain         | 2007/2009 | CS/3                    | 24                | SPE-LC-MS/MS   | 2.1/NA                        | NA                            | 69                                            | NA                                            | [12]      |
|                    | Spain         | 2008/2009 | TP/3                    | 42                | SPE-UPLC-MS/MS | 0/54                          | 0                             | ND                                            | ND                                            | [9]       |
|                    | Spain         | 2008/2009 | TP/3                    | 42                | SPE-LC-MS/MS   | NA/50                         | 0                             | ND                                            | ND                                            | [9]       |
|                    | Spain         | 2009      | TP/3                    | 14                | SPE-LC-MS/MS   | NA/150                        | 0                             | ND                                            | ND                                            | [9]       |
|                    | USA           | 2013      | TP/2                    | 14                | SPE-LC-MS/MS   | NA                            | 72                            | 18                                            | 34                                            | [10]      |
|                    |               |           |                         |                   |                |                               | 37.6(100)                     | 35.2(299.0)                                   | 51.3(446.0)                                   |           |
| Zolpidem (ZOL)     | Portugal      | 2009      | GS/2                    | 2                 | SPE-LC-MS/MS   | 1/3                           | 0                             | ND                                            | ND                                            | [6]       |
|                    | Portugal      | NA        | TP/1                    | 48                | SPE-LC-MS      | NA                            | 0                             | ND                                            | ND                                            | [8]       |
|                    | Sweden        | 2013      | FP/1                    | 7                 | SPE-LC-MS/MS   | NA                            | 43                            | 13                                            | NA                                            | [13]      |
| Total              |               |           |                         |                   |                |                               | 14.3(43.0)                    | 4.3(13.0)                                     | NA                                            |           |
| Antibiotics        |               |           |                         |                   |                |                               | 31.2(100)                     | 19.9(299.0)                                   | 209.7(4705.0)                                 |           |
| Azithromycin (AZI) | Croatia       | NA        | NA/5                    | 5                 | SPE-LC-MS/MS   | 7/23                          | NA                            | 152                                           | 300                                           | [14]      |

| Pharmaceutical       | Country        | Year      | Sampling Type/Locations | Number Of Samples | Method          | LOD/LOQ (ng L <sup>-1</sup> ) | Frequency (Highest Value) (%) | Average (Highest Value) (ng L <sup>-1</sup> ) | Maximum (Highest Value) (ng L <sup>-1</sup> ) | Reference |
|----------------------|----------------|-----------|-------------------------|-------------------|-----------------|-------------------------------|-------------------------------|-----------------------------------------------|-----------------------------------------------|-----------|
|                      | Czech Republic | 2011/2012 | TP/1                    | 136               | SPE-LC-MS/MS    | NA/7                          | 99                            | 140                                           | 510                                           | [15]      |
|                      | Greece         | 2011      | FP/1                    | 8                 | SPE-LC-MS/MS    | 19/58.5                       | 25                            | ND                                            | 64                                            | [16]      |
|                      | International  | NA        | NA                      | NA                | NA              | NA                            | NA                            | 400                                           | 3000                                          | [11]      |
|                      | Italy          | NA        | TP/1                    | 4                 | SPE-LC-MS/MS    | 2/NA                          | NA                            | 120                                           | NA                                            | [17]      |
|                      | Japan          | 2007/2009 | NA/9                    | 9                 | NA              | NA                            | NA                            | 645                                           | NA                                            | [18]      |
|                      | NA             | NA        | NA                      | 6                 | NA              | NA                            | 100                           | 260                                           | NA                                            | [19]      |
|                      | Portugal       | 2009      | GS/2                    | 2                 | SPE-LC-MS/MS    | 2/6                           | 100                           | 594                                           | 617                                           | [6]       |
|                      | Portugal       | 2011      | TP/1                    | 7                 | SPE-LC-MS/MS    | NA                            | 100                           | 186                                           | 295                                           | [7]       |
|                      | Portugal       | 2013/2014 | FP/2                    | 18                | SPE-UHPLC-MS/MS | 0.06/0.18                     | 16.65                         | 18.95                                         | 67                                            | [20]      |
|                      | Portugal       | NA        | TP/1                    | 48                | SPE-LC-MS       | 3/11                          | 17                            | NA                                            | 210                                           | [8]       |
|                      | Spain          | 2011      | GS/3                    | 3                 | SPE-UPLC-MS/MS  | 3.3/10.9                      | 66                            | 368                                           | 437                                           | [21]      |
|                      | USA            | 2010      | FP/1                    | 6                 | SPE-LC-MS/MS    | 3.7/11                        | NA                            | <LOQ                                          | 280                                           | [22]      |
|                      |                |           |                         |                   |                 |                               | 65.5(100)                     | 240.3(645.0)                                  | 578.0(3000.0)                                 |           |
| Clarithromycin (CLA) | Czech Republic | 2011/2012 | TP/1                    | 136               | SPE-LC-MS/MS    | NA/3                          | 100                           | 1480                                          | 3090                                          | [15]      |
|                      | Greece         | 2011      | FP/1                    | 8                 | SPE-LC-MS/MS    | 1.9/5.8                       | 100                           | 1377                                          | 2683                                          | [16]      |
|                      | International  | NA        | NA                      | NA                | NA              | NA                            | NA                            | 1300                                          | 8000                                          | [11]      |
|                      | Italy          | 2007/2008 | TP/4                    | 24                | SPE-LC-MS/MS    | NA/NA                         | NA                            | 476                                           | NA                                            | [23]      |
|                      | Italy          | NA        | TP/1                    | 4                 | SPE-LC-MS/MS    | 6/NA                          | NA                            | 200                                           | NA                                            | [17]      |

| Pharmaceutical      | Country        | Year      | Sampling Type/Locations | Number Of Samples | Method          | LOD/LOQ (ng L <sup>-1</sup> ) | Frequency (Highest Value) (%) | Average (Highest Value) (ng L <sup>-1</sup> ) | Maximum (Highest Value) (ng L <sup>-1</sup> ) | Reference      |
|---------------------|----------------|-----------|-------------------------|-------------------|-----------------|-------------------------------|-------------------------------|-----------------------------------------------|-----------------------------------------------|----------------|
|                     | Japan          | 2007/2009 | NA/9                    | 9                 | NA              | NA                            | NA                            | 964                                           | NA                                            | [18]           |
|                     | NA             | NA        | NA                      | 6                 | NA              | NA                            | 100                           | 647                                           | NA                                            | [19]           |
|                     | Portugal       | 2011      | TP/1                    | 7                 | SPE-LC-MS/MS    | NA                            | NA                            | 22.2                                          | 52.3                                          | [7]            |
|                     | Portugal       | 2013/2014 | FP/2                    | 18                | SPE-UHPLC-MS/MS | 0.06/0.20                     | 16.65                         | 24.15                                         | 48.2                                          | [20]           |
|                     | Spain          | 2007/2009 | CS/3                    | 24                | SPE-LC-MS/MS    | 1.5/NA                        | NA                            | 62                                            | NA                                            | [12]           |
|                     | Spain          | 2009      | TP/3                    | 14                | SPE-LC-MS/MS    | NA/10                         | 100                           | 230                                           | 620                                           | [9]            |
|                     | Spain          | 2011      | GS/3                    | 3                 | SPE-UPLC-MS/MS  | 16.6/55.5                     | 100                           | 358                                           | 632                                           | [21]           |
|                     | Sweden         | 2013      | FP/1                    | 7                 | SPE-LC-MS/MS    | NA                            | 100                           | 29                                            | NA                                            | [13]           |
|                     | Taiwan         | NA        | GS/1                    | NA                | SPE-LC-MS/MS    | 0.5                           | NA                            | 324                                           | NA                                            | [24]           |
|                     | USA            | 2010      | FP/1                    | 6                 | SPE-LC-MS/MS    | 3.2/9.6                       | NA                            | <LOQ                                          | 5.6                                           | [22]           |
|                     |                |           |                         |                   |                 |                               |                               | 88.1(100)                                     | 499.6(1480.0)                                 | 1891.4(8000.0) |
| Ciprofloxacin (CIP) | Belgium        | 2013      | TP/2                    | 10                | SPE-LC-HRMS     | 75/250                        | 70                            | 698                                           | NA                                            | [1]            |
|                     | Czech Republic | 2011/2012 | TP/1                    | 136               | SPE-LC-MS/MS    | NA/3                          | 100                           | 410                                           | 860                                           | [15]           |
|                     | Greece         | 2011      | FP/1                    | 8                 | SPE-LC-MS/MS    | 5.4/16.3                      | 100                           | 1588                                          | 2881                                          | [16]           |
|                     | Greece         | 2013/2014 | TP/1                    | 24                | SPE-LC-MS/MS    | 18.4/60.7                     | 29.2                          | 152                                           | 591                                           | [25]           |
|                     | International  | NA        | NA                      | NA                | NA              | NA                            | NA                            | 1600                                          | 11 000                                        | [11]           |
|                     | Italy          | 2007/2008 | TP/4                    | 24                | SPE-LC-MS/MS    | NA/NA                         | NA                            | 68                                            | NA                                            | [23]           |

| Pharmaceutical | Country  | Year      | Sampling Type/Locations | Number Of Samples | Method          | LOD/LOQ (ng L <sup>-1</sup> ) | Frequency (Highest Value) (%) | Average (Highest Value) (ng L <sup>-1</sup> ) | Maximum (Highest Value) (ng L <sup>-1</sup> ) | Reference |
|----------------|----------|-----------|-------------------------|-------------------|-----------------|-------------------------------|-------------------------------|-----------------------------------------------|-----------------------------------------------|-----------|
|                | Italy    | NA        | TP/1                    | 4                 | SPE-LC-MS/MS    | 3/NA                          | NA                            | 2200                                          | NA                                            | [17]      |
|                | Kenya    | 2012/2013 | GS/3                    | 3                 | SPE-LC-MS       | NA/NA                         | 66.6                          | 136.6                                         | 270                                           | [26]      |
|                | Korea    | 2007      | GS/10                   | 10                | SPE-LC-MS/MS    | NA                            | 0                             | ND                                            | ND                                            | [27]      |
|                | Korea    | 2008      | GS/12                   | 30                | SPE-LC-MS/MS    | NA                            | 10                            | 182                                           | 246                                           | [28]      |
|                | NA       | NA        | NA                      | 20                | NA              | NA                            | 83                            | 413                                           | 571                                           | [19]      |
|                | Portugal | 2007      | TP/1                    | 2                 | SPE-LC-FD       | 17/NA                         | 100                           | 433.0                                         | 418.8                                         | [29]      |
|                | Portugal | 2009      | GS/2                    | 2                 | SPE-LC-MS/MS    | 2/6                           | 0                             | ND                                            | ND                                            | [6]       |
|                | Portugal | 2011      | TP/1                    | 7                 | SPE-LC-MS/MS    | NA                            | 100                           | 221                                           | 330                                           | [7]       |
|                | Portugal | 2013/2014 | FP/2                    | 18                | SPE-UHPLC-MS/MS | 28.1/84.2                     | 38.9                          | 196                                           | 251                                           | [20]      |
|                | Portugal | NA        | TP/1                    | 48                | SPE-LC-MS       | 1/3                           | 10                            | NA                                            | 15 397                                        | [8]       |
|                | Spain    | 2009      | TP/3                    | 14                | SPE-LC-MS/MS    | NA/320                        | 100                           | 2450                                          | 3850                                          | [9]       |
|                | Spain    | 2011      | GS/3                    | 3                 | SPE-UPLC-MS/MS  | 13.6/34.5                     | 100                           | 414                                           | 613                                           | [21]      |
|                | Spain    | NA        | NA/1                    | 12                | SPE-LC-MS/MS    | NA                            | NA                            | 5524                                          | 13 625                                        | [30]      |
|                | Sweden   | 2002/2003 | FP/5                    | 10                | SPE-LC-MS       | NA/6                          | 100                           | 158                                           | 300                                           | [31]      |
|                | Sweden   | 2013      | FP/1                    | 7                 | SPE-LC-MS/MS    | NA                            | 71                            | 196                                           | NA                                            | [13]      |
|                | Taiwan   | NA        | GS/1                    | NA                | SPE-LC-MS/MS    | 0.5                           | NA                            | 157                                           | NA                                            | [24]      |
|                | USA      | 2010      | FP/1                    | 6                 | SPE-LC-MS/MS    | 3.3/6.7                       | NA                            | <LOQ                                          | 8.7                                           | [22]      |

| Pharmaceutical     | Country        | Year      | Sampling Type/Locations | Number Of Samples | Method       | LOD/LOQ (ng L <sup>-1</sup> ) | Frequency (Highest Value) (%) | Average (Highest Value) (ng L <sup>-1</sup> ) | Maximum (Highest Value) (ng L <sup>-1</sup> ) | Reference |
|--------------------|----------------|-----------|-------------------------|-------------------|--------------|-------------------------------|-------------------------------|-----------------------------------------------|-----------------------------------------------|-----------|
|                    | USA            | NA        | CS/7                    | 10                | SPE-LC-MS    | NA/50                         | 40<br>62.2(100)               | 150<br>754.2(5524.0)                          | 210<br>2706.4(15 397)                         | [32]      |
| Erythromycin (ERY) | Croatia        | NA        | NA/5                    | 5                 | SPE-LC-MS/MS | 6/20                          | NA                            | ND                                            | ND                                            | [14]      |
|                    | Czech Republic | 2011/2012 | TP/1                    | 136               | SPE-LC-MS/MS | NA/6                          | 100                           | 110                                           | 350                                           | [15]      |
|                    | Greece         | 2011      | FP/1                    | 8                 | SPE-LC-MS/MS | 155/470                       | 0                             | ND                                            | ND                                            | [16]      |
|                    | Greece         | 2013/2014 | TP/1                    | 24                | SPE-LC-MS/MS | 32.8/108.2                    | 83.3                          | 70.8                                          | 320                                           | [25]      |
|                    | International  | NA        | NA                      | NA                | NA           | NA                            | NA                            | NA                                            | 10 000                                        | [33]      |
|                    | International  | NA        | NA                      | NA                | NA           | NA                            | NA                            | 1800                                          | 10 000                                        | [11]      |
|                    | Italy          | 2007/2008 | TP/4                    | 24                | SPE-LC-MS/MS | NA/NA                         | NA                            | 0.9                                           | NA                                            | [23]      |
|                    | Italy          | NA        | TP/1                    | 4                 | SPE-LC-MS/MS | 7/NA                          | NA                            | 46                                            | NA                                            | [17]      |
|                    | Japan          | 2007/2009 | NA/9                    | 9                 | NA           | NA                            | NA                            | 212                                           | NA                                            | [18]      |
|                    | Korea          | 2007      | GS/10                   | 10                | SPE-LC-MS/MS | NA                            | NA                            | NA                                            | 1050                                          | [27]      |
|                    | Korea          | 2008      | GS/12                   | 30                | SPE-LC-MS/MS | NA                            | 47                            | 23                                            | 46                                            | [28]      |
|                    | NA             | NA        | NA                      | 3                 | NA           | NA                            | 100                           | 413                                           | 571                                           | [19]      |
|                    | Portugal       | 2011      | TP/1                    | 7                 | SPE-LC-MS/MS | NA                            | 100                           | 92.7                                          | 220                                           | [7]       |
|                    | South Africa   | 2013      | GS/3                    | 3                 | SPE-LC-MS/MS | 3/12                          | NA                            | 1130                                          | NA                                            | [34]      |
|                    | Spain          | 2009      | TP/3                    | 14                | SPE-LC-MS/MS | NA/20                         | 0                             | ND                                            | ND                                            | [9]       |
| Spain              | NA             | NA/1      | 12                      | SPE-LC-MS/MS      | NA           | NA                            | 346                           | 2310                                          | [30]                                          |           |

| Pharmaceutical          | Country       | Year      | Sampling Type/Locations | Number Of Samples | Method         | LOD/LOQ (ng L <sup>-1</sup> ) | Frequency (Highest Value) (%) | Average (Highest Value) (ng L <sup>-1</sup> ) | Maximum (Highest Value) (ng L <sup>-1</sup> ) | Reference |
|-------------------------|---------------|-----------|-------------------------|-------------------|----------------|-------------------------------|-------------------------------|-----------------------------------------------|-----------------------------------------------|-----------|
|                         | Sweden        | 2002/2003 | FP/5                    | 10                | SPE-LC-MS      | NA/160                        | 0                             | ND                                            | ND                                            | [31]      |
|                         | Taiwan        | NA        | GS/1                    | NA                | SPE-LC-MS/MS   | 0.1                           | NA                            | 319                                           | NA                                            | [24]      |
|                         | UK            | 2007      | GS/2                    | 20                | SPE-LC-MS/MS   | NA                            | 100                           | 2070                                          | 10 025                                        | [35]      |
|                         | UK            | NA        | NA                      | NA                | NA             | NA                            | NA                            | NA                                            | 2530                                          | [36]      |
|                         | USA           | 2010      | TP/1                    | 6                 | SPE-LC-MS/MS   | 2.2/7.3                       | 0                             | ND                                            | ND                                            | [37]      |
|                         | USA           | NA        | CS/7                    | 10                | SPE-LC-MS      | NA/50                         | 60                            | 340                                           | 1200                                          | [32]      |
|                         |               |           |                         |                   |                |                               | 53.7(100)                     | 367.0(2070.0)                                 | 2413.9(10 025)                                |           |
|                         |               |           |                         |                   |                |                               | 64.8(100)                     | 502.9(5524.0)                                 | 2093.5(15 397)                                |           |
| <b>Total</b>            |               |           |                         |                   |                |                               |                               |                                               |                                               |           |
| <b>Lipid regulators</b> |               |           |                         |                   |                |                               |                               |                                               |                                               |           |
| Bezafibrate (BEZ)       | Brazil        | 1997      | TP/1                    | 6                 | SPE-GC-MS      | NA                            | NA                            | 1200                                          | NA                                            | [38]      |
|                         | China         | 2009/2010 | GS/2                    | 24                | SPE-UPLC-MS/MS | NA                            | 100                           | 72.6                                          | 159                                           | [39]      |
|                         | Croatia       | NA        | NA/5                    | 5                 | SPE-LC-MS/MS   | 9/31                          | NA                            | 23                                            | 50                                            | [14]      |
|                         | Greece        | 2010/2011 | TP/8                    | 32                | SPE-LC-MS/MS   | NA                            | 66                            | 137                                           | 946                                           | [40]      |
|                         | Greece        | 2013/2014 | TP/1                    | 24                | SPE-LC-MS/MS   | 7.9/26.1                      | 8.3                           | <LOD                                          | 51.8                                          | [25]      |
|                         | International | NA        | NA                      | NA                | NA             | NA                            | NA                            | NA                                            | 1390                                          | [33]      |
|                         | International | NA        | NA                      | NA                | NA             | NA                            | NA                            | 3500                                          | 15 000                                        | [11]      |
|                         | Mexico        | 2015/2016 | TP/2                    | 8                 | SPE-LC-MS/MS   | 4.9/16                        | 100                           | 2342.5                                        | 3445                                          | [41]      |
|                         | NA            | NA        | NA                      | 25                | NA             | NA                            | 100                           | 2400                                          | 7600                                          | [19]      |
|                         | Portugal      | 2009      | GS/2                    | 2                 | SPE-LC-MS/MS   | 5/18                          | 100                           | 3283                                          | 5217                                          | [6]       |
| Portugal                | 2011          | TP/1      | 7                       | SPE-LC-MS/MS      | NA             | 100                           | 490                           | 623                                           | [7]                                           |           |

| Pharmaceutical    | Country       | Year      | Sampling Type/Locations | Number Of Samples | Method         | LOD/LOQ (ng L <sup>-1</sup> ) | Frequency (Highest Value) (%) | Average (Highest Value) (ng L <sup>-1</sup> ) | Maximum (Highest Value) (ng L <sup>-1</sup> ) | Reference |
|-------------------|---------------|-----------|-------------------------|-------------------|----------------|-------------------------------|-------------------------------|-----------------------------------------------|-----------------------------------------------|-----------|
|                   | Spain         | 2007/2009 | CS/3                    | 24                | SPE-LC-MS/MS   | 1.2/NA                        | NA                            | 381                                           | NA                                            | [12]      |
|                   | Spain         | 2008/2009 | TP/3                    | 42                | SPE-LC-MS/MS   | NA/20                         | 100                           | 160                                           | 460                                           | [9]       |
|                   | Spain         | 2009      | TP/3                    | 14                | SPE-LC-MS/MS   | NA/30                         | 100                           | 80                                            | 100                                           | [9]       |
|                   | Spain         | 2012      | GS/3                    | 21                | SPE-UPLC-MS/MS | NA/5.0                        | 100                           | 53                                            | 59.1                                          | [42]      |
|                   | Spain         | NA        | NA/1                    | 12                | SPE-LC-MS/MS   | NA                            | NA                            | 141                                           | 361                                           | [30]      |
|                   | UK            | 2007      | GS/2                    | 20                | SPE-LC-MS/MS   | NA                            | 100                           | 429                                           | 1391                                          | [35]      |
|                   | UK            | NA        | NA                      | NA                | NA             | NA                            | NA                            | NA                                            | 971                                           | [43]      |
| Gemfibrozil (GEM) | Brazil        | 1997      | TP/1                    | 6                 | SPE-GC-MS      | NA                            | NA                            | 350                                           | NA                                            | [38]      |
|                   | Canada        | 2004      | TP/8                    | 8                 | SPE-GC-MS/MS   | 10/NA                         | 100                           | 260                                           | 36 530                                        | [44]      |
|                   | China         | 2009/2010 | GS/2                    | 24                | SPE-UPLC-MS/MS | NA                            | 100                           | 116                                           | 359                                           | [39]      |
|                   | China         | 2012/2013 | GS/1                    | 4                 | SPE-LC-MS/MS   | 0.1/NA                        | NA                            | 70                                            | NA                                            | [45]      |
|                   | China         | 2014      | GS/3                    | 12                | SPE-LC-MS/MS   | 0.1/NA                        | 100                           | 7.2                                           | 26.6                                          | [46]      |
|                   | Croatia       | NA        | NA/5                    | 5                 | SPE-LC-MS/MS   | 3/9                           | NA                            | 155                                           | 360                                           | [14]      |
|                   | Greece        | 2010/2011 | TP/8                    | 32                | SPE-LC-MS/MS   | NA                            | 66                            | 174                                           | 899                                           | [40]      |
|                   | Greece        | 2011      | FP/1                    | 8                 | SPE-LC-MS/MS   | 2.6/7.9                       | 100                           | 348                                           | 753                                           | [16]      |
|                   | Greece        | 2013/2014 | TP/1                    | 24                | SPE-LC-MS/MS   | 38.7/127.7                    | 0                             | ND                                            | ND                                            | [25]      |
|                   | International | NA        | NA                      | NA                | NA             | NA                            | NA                            | NA                                            | 17 100                                        | [33]      |



| Pharmaceutical    | Country       | Year      | Sampling Type/Locations | Number Of Samples | Method          | LOD/LOQ (ng L <sup>-1</sup> ) | Frequency (Highest Value) (%) | Average (Highest Value) (ng L <sup>-1</sup> ) | Maximum (Highest Value) (ng L <sup>-1</sup> ) | Reference |
|-------------------|---------------|-----------|-------------------------|-------------------|-----------------|-------------------------------|-------------------------------|-----------------------------------------------|-----------------------------------------------|-----------|
|                   | International | NA        | NA                      | NA                | NA              | NA                            | NA                            | 2400                                          | 12 000                                        | [11]      |
|                   | Korea         | 2007      | GS/10                   | 10                | SPE-LC-MS/MS    | NA                            | NA                            | NA                                            | 20                                            | [27]      |
|                   | Korea         | 2010      | NA/5                    | 5                 | SPE-LC-MS/MS    | NA                            | 100                           | 222                                           | 318                                           | [47]      |
|                   | Mexico        | 2015/2016 | TP/2                    | 8                 | SPE- HPLC-MS/MS | 11/38                         | 100                           | 111.5                                         | 225                                           | [41]      |
|                   | NA            | NA        | NA                      | 4                 | NA              | NA                            | 25                            | 1630                                          | 3000                                          | [19]      |
|                   | Portugal      | 2009      | GS/2                    | 2                 | SPE-LC-MS/MS    | 11/40                         | 100                           | 299                                           | 307                                           | [6]       |
|                   | Portugal      | 2011      | TP/1                    | 7                 | SPE-LC-MS/MS    | NA                            | NA                            | <LOQ                                          | 22.5                                          | [7]       |
|                   | Spain         | 2007/2009 | CS/3                    | 24                | SPE-LC-MS/MS    | 0.9/NA                        | NA                            | 144                                           | NA                                            | [12]      |
|                   | Spain         | 2008/2009 | TP/3                    | 42                | SPE-LC-MS/MS    | NA/50                         | 100                           | 1110                                          | 2120                                          | [9]       |
|                   | Spain         | 2009      | TP/3                    | 14                | SPE-LC-MS/MS    | NA/70                         | 100                           | 210                                           | 540                                           | [9]       |
|                   | Spain         | 2012      | GS/3                    | 21                | SPE-UPLC-MS/MS  | NA/10                         | 100                           | 336                                           | 371.8                                         | [42]      |
|                   | Spain         | NA        | NA/1                    | 12                | SPE-LC-MS/MS    | NA                            | NA                            | 3525                                          | 17 055                                        | [30]      |
|                   | Sweden        | 2002      | FP/1                    | 1                 | SPE-GC/LC-MS/MS | NA                            | 100                           | 710                                           | 710                                           | [48]      |
|                   | USA           | 2010      | FP/1                    | 6                 | SPE-LC-MS/MS    | 1.6/4.8                       | 100                           | 180                                           | 1200                                          | [22]      |
|                   |               |           |                         |                   |                 |                               | 86.1(100)                     | 561.7(3525.0)                                 | 4472.2(36 530)                                |           |
| Simvastatin (SIM) | Canada        | 2002      | NA/1                    | 3                 | SPE-LC-MS/MS    | 1.0/NA                        | NA                            | 4                                             | NA                                            | [49]      |
|                   | Greece        | 2010/2011 | TP/8                    | 32                | SPE-LC-MS/MS    | NA                            | 34                            | 20                                            | 91                                            | [40]      |

| Pharmaceutical      | Country       | Year      | Sampling Type/Locations | Number Of Samples | Method              | LOD/LOQ (ng L <sup>-1</sup> ) | Frequency (Highest Value) (%) | Average (Highest Value) (ng L <sup>-1</sup> ) | Maximum (Highest Value) (ng L <sup>-1</sup> ) | Reference |
|---------------------|---------------|-----------|-------------------------|-------------------|---------------------|-------------------------------|-------------------------------|-----------------------------------------------|-----------------------------------------------|-----------|
|                     | Greece        | 2011      | FP/1                    | 8                 | SPE-LC-MS/MS        | 28/84.2                       | 38                            | 147                                           | 914                                           | [16]      |
|                     | Greece        | 2013/2014 | TP/1                    | 24                | SPE-LC-MS/MS        | 11.6/38.3                     | 8.3                           | 49.1                                          | 718                                           | [25]      |
|                     | International | NA        | NA                      | NA                | NA                  | NA                            | NA                            | 4                                             | 4                                             | [11]      |
|                     | Malaysia      | 2013      | GS/4                    | 12                | SPE-LC-MS/MS        | NA/15                         | 50                            | 27                                            | 35                                            | [50]      |
|                     | Portugal      | 2009      | GS/2                    | 2                 | SPE-LC-MS/MS        | 8/29                          | 50                            | 976                                           | 976                                           | [6]       |
|                     | Spain         | 2009      | TP/3                    | 14                | SPE-LC-MS/MS        | NA/130                        | 0                             | ND                                            | ND                                            | [9]       |
|                     | UK            | 2007      | GS/2                    | 20                | SPE-LC-MS/MS        | NA                            | 29                            | 115                                           | 798                                           | [35]      |
|                     | UK            | NA        | NA                      | NA                | NA                  | NA                            | NA                            | NA                                            | 115                                           | [43]      |
| Total               |               |           |                         |                   |                     |                               | 29.9(50.0)                    | 149.1(976.0)                                  | 405.7(976.0)                                  |           |
| Antiepileptic       |               |           |                         |                   |                     |                               | 75.0(100)                     | 604.1(3525.0)                                 | 2943.3(36 530)                                |           |
| Carbamazepine (CAR) | Belgium       | 2013      | TP/2                    | 10                | SPE-LC-HRMS         | 39/129                        | 100                           | 609.6                                         | NA                                            | [1]       |
|                     | Canada        | NA        | TP/1                    | NA                | SPE-LDTD-APCI-MS/MS | 54/108                        | NA                            | 305                                           | NA                                            | [51]      |
|                     | China         | 2009/2010 | GS/2                    | 24                | SPE-UPLC-MS/MS      | NA                            | 100                           | 70.7                                          | 233                                           | [39]      |
|                     | China         | 2011      | GS/3                    | 19                | SPE-LC-MS/MS        | NA/0.3                        | 84                            | NA                                            | 23.7                                          | [3]       |
|                     | China         | 2011      | GS/3                    | 3                 | SPE-LC-MS/MS        | NA                            | 100                           | 21.3                                          | 23                                            | [2]       |
|                     | China         | 2012/2013 | GS/1                    | 4                 | SPE-LC-MS/MS        | 0.1/NA                        | NA                            | 50                                            | NA                                            | [45]      |
|                     | China         | 2014      | GS/3                    | 12                | SPE-LC-MS/MS        | 0.1/NA                        | 75                            | 3.9                                           | 15.1                                          | [46]      |

| Pharmaceutical | Country        | Year      | Sampling Type/Locations | Number Of Samples | Method        | LOD/LOQ (ng L <sup>-1</sup> ) | Frequency (Highest Value) (%) | Average (Highest Value) (ng L <sup>-1</sup> ) | Maximum (Highest Value) (ng L <sup>-1</sup> ) | Reference |
|----------------|----------------|-----------|-------------------------|-------------------|---------------|-------------------------------|-------------------------------|-----------------------------------------------|-----------------------------------------------|-----------|
|                | China          | 2014      | TP/5                    | 5                 | SPE-LC-MS/MS  | NA/2.5                        | 100                           | 45.2                                          | 68.2                                          | [4]       |
|                | Croatia        | NA        | NA/5                    | 5                 | SPE-LC-MS/MS  | 18/61                         | NA                            | 420                                           | 950                                           | [14]      |
|                | Czech Republic | 2011/2012 | TP/1                    | 136               | SPE-LC-MS/MS  | NA/8                          | 100                           | 460                                           | 710                                           | [15]      |
|                | Greece         | 2010/2011 | TP/8                    | 32                | SPE-LC-MS/MS  | NA                            | 100                           | 76                                            | 355                                           | [40]      |
|                | Greece         | 2011      | FP/1                    | 8                 | SPE-LC-MS/MS  | 21/64.2                       | 100                           | 533                                           | 1713                                          | [16]      |
|                | Greece         | 2013/2014 | TP/1                    | 24                | SPE-LC-MS/MS  | 2.1/7                         | 100                           | 34.1                                          | 114                                           | [25]      |
|                | India          | 2013      | GS/2                    | 7                 | SPE-LC-MS/MS  | NA/NA                         | 100                           | 500                                           | 750                                           | [5]       |
|                | International  | NA        | NA                      | NA                | NA            | NA                            | NA                            | NA                                            | 3780                                          | [33]      |
|                | International  | NA        | NA                      | NA                | NA            | NA                            | NA                            | 1200                                          | 12 000                                        | [11]      |
|                | Italy          | NA        | TP/1                    | 4                 | SPE-LC-MS/MS  | 4/NA                          | NA                            | 570                                           | NA                                            | [17]      |
|                | Japan          | 2001/2003 | TP/5                    | 12                | SPE-GC-MS     | NA                            | NA                            | 54                                            | 270                                           | [52]      |
|                | Kenya          | 2012/2013 | GS/3                    | 3                 | SPE-LC-MS     | NA/NA                         | 33.3                          | 116.66                                        | 350                                           | [26]      |
|                | Korea          | 2007      | GS/10                   | 10                | SPE-LC-MS/MS  | NA                            | NA                            | NA                                            | 500                                           | [27]      |
|                | Korea          | 2008      | GS/12                   | 30                | SPE-LC-MS/MS  | NA                            | 100                           | 1920                                          | 21 600                                        | [28]      |
|                | Korea          | 2010      | NA/5                    | 5                 | SPE-LC-MS/MS  | NA                            | 100                           | 72                                            | 127                                           | [47]      |
|                | Malaysia       | 2013      | GS/4                    | 12                | SPE-LC-MS/MS  | NA/22                         | 83                            | 62                                            | 182                                           | [50]      |
|                | Mexico         | 2015/2016 | TP/2                    | 8                 | SPE- LC-MS/MS | 5.5/18                        | 100                           | 214                                           | 380                                           | [41]      |

| Pharmaceutical | Country      | Year      | Sampling Type/Locations | Number Of Samples | Method          | LOD/LOQ (ng L <sup>-1</sup> ) | Frequency (Highest Value) (%) | Average (Highest Value) (ng L <sup>-1</sup> ) | Maximum (Highest Value) (ng L <sup>-1</sup> ) | Reference |
|----------------|--------------|-----------|-------------------------|-------------------|-----------------|-------------------------------|-------------------------------|-----------------------------------------------|-----------------------------------------------|-----------|
|                | NA           | NA        | NA                      | 64                | NA              | NA                            | 100                           | 968                                           | 1900                                          | [19]      |
|                | Portugal     | 2011      | TP/1                    | 7                 | SPE-LC-MS/MS    | NA                            | 100                           | 565                                           | 673                                           | [7]       |
|                | Portugal     | 2013/2014 | FP/2                    | 18                | SPE-UHPLC-MS/MS | 0.06/0.18                     | 100                           | 94.95                                         | 226                                           | [20]      |
|                | Portugal     | NA        | GS/5                    | 10                | SPE-LC-MS       | 2/7                           | 20                            | NA                                            | 994                                           | [53]      |
|                | Portugal     | NA        | TP/1                    | 48                | SPE-LC-MS       | 2/7                           | 8                             | NA                                            | 1950                                          | [8]       |
|                | South Africa | 2013      | GS/3                    | 3                 | SPE-LC-MS/MS    | 268/891                       | NA                            | 4560                                          | NA                                            | [34]      |
|                | Spain        | 2003/2004 | TP/1                    | 10                | SPE-LC-MS/MS    | 30/NA                         | 100                           | 150                                           | 310                                           | [54]      |
|                | Spain        | 2007/2009 | CS/3                    | 24                | SPE-LC-MS/MS    | 0.6/NA                        | NA                            | 591                                           | NA                                            | [12]      |
|                | Spain        | NA        | NA/1                    | 12                | SPE-LC-MS/MS    | NA                            | NA                            | 129                                           | 173                                           | [30]      |
|                | Sweden       | 2002      | FP/1                    | 1                 | SPE-GC/LC-MS/MS | NA                            | 100                           | 1680                                          | 1680                                          | [48]      |
|                | Sweden       | 2013      | FP/1                    | 7                 | SPE-LC-MS/MS    | NA                            | 100                           | 284                                           | NA                                            | [13]      |
|                | Taiwan       | NA        | GS/1                    | NA                | SPE-LC-MS/MS    | 0.1                           | NA                            | 24.8                                          | NA                                            | [24]      |
|                | UK           | 2007      | GS/2                    | 20                | SPE-LC-MS/MS    | NA                            | 100                           | 1322                                          | 3110                                          | [35]      |
|                | UK           | NA        | NA                      | NA                | NA              | NA                            | NA                            | NA                                            | 2593                                          | [43]      |
|                | USA          | 2010      | TP/1                    | 6                 | SPE-LC-MS/MS    | 86.5/288.3                    | NA                            | 5                                             | NA                                            | [37]      |
|                | USA          | 2010      | FP/1                    | 6                 | SPE-LC-MS/MS    | 2.7/8.2                       | 100                           | 72                                            | 310                                           | [22]      |
|                | USA          | 2013      | TP/2                    | 14                | SPE-LC-MS/MS    | NA                            | 100                           | 193                                           | 588                                           | [10]      |

| Pharmaceutical                                  | Country        | Year      | Sampling Type/Locations | Number Of Samples | Method          | LOD/LOQ (ng L <sup>-1</sup> ) | Frequency (Highest Value) (%) | Average (Highest Value) (ng L <sup>-1</sup> ) | Maximum (Highest Value) (ng L <sup>-1</sup> ) | Reference |
|-------------------------------------------------|----------------|-----------|-------------------------|-------------------|-----------------|-------------------------------|-------------------------------|-----------------------------------------------|-----------------------------------------------|-----------|
|                                                 |                |           |                         |                   |                 |                               | 89.0(100)                     | 513.6(4560.0)                                 | 1832.8(21 600)                                |           |
| Selective serotonin reuptake inhibitors (SSRIs) |                |           |                         |                   |                 |                               |                               |                                               |                                               |           |
| Citalopram (CIT)                                | Canada         | 2007      | FP/1                    | 6                 | SPE-LC-MS/MS    | 0.077/NA                      | 100                           | 52.5                                          | 52.7                                          | [55]      |
|                                                 | China          | 2011      | GS/3                    | 19                | SPE-LC-MS/MS    | NA/0.1                        | 100                           | NA                                            | 3.5                                           | [3]       |
|                                                 | China          | 2011      | GS/3                    | 3                 | SPE-LC-MS/MS    | NA                            | 100                           | 2.5                                           | 4                                             | [2]       |
|                                                 | Czech Republic | 2011/2012 | TP/1                    | 136               | SPE-LC-MS/MS    | NA/5                          | 100                           | 83                                            | 180                                           | [15]      |
|                                                 | Norway         | 2005      | FP/3                    | 3                 | SPE-LC-MS/MS    | NA/0.6                        | 100                           | 257                                           | 612                                           | [56]      |
|                                                 | Norway         | 2007      | FP/2                    | 3                 | LPME-LC-MS/MS   | 0.017/0.057                   | 100                           | 156                                           | 303.6                                         | [57]      |
|                                                 | Portugal       | 2011      | TP/1                    | 7                 | SPE-LC-MS/MS    | NA                            | 100                           | 23.3                                          | 34.3                                          | [7]       |
|                                                 | Portugal       | 2013/2014 | FP/2                    | 18                | SPE-UHPLC-MS/MS | 0.96/2.94                     | 38.85                         | 19.4                                          | 35.7                                          | [20]      |
|                                                 | Sweden         | 2013      | FP/1                    | 7                 | SPE-LC-MS/MS    | NA                            | 100                           | 266                                           | NA                                            | [13]      |
|                                                 | USA            | 2013      | TP/2                    | 14                | SPE-LC-MS/MS    | NA                            | 100                           | 96                                            | 170                                           | [10]      |
|                                                 |                |           |                         |                   |                 |                               | 93.9(100)                     | 106.2(266.0)                                  | 155.1(612.0)                                  |           |
| Desmethylcitalopram (N-CIT)                     | Norway         | 2007      | FP/2                    | 3                 | LPME-LC-MS/MS   | 0.229/0.762                   | 100                           | 253                                           | 425.7                                         | [57]      |
|                                                 | USA            | 2013      | TP/2                    | 14                | SPE-LC-MS/MS    | NA                            | 50                            | 34                                            | 126                                           | [10]      |
|                                                 |                |           |                         |                   |                 |                               | 75.0(100)                     | 143.5(253.0)                                  | 275.9(425.7)                                  |           |
| Escitalopram (ESC)                              | Portugal       | NA        | TP/1                    | 48                | SPE-LC-MS       | 14/47                         | 21                            | NA                                            | 32 228                                        | [8]       |

| Pharmaceutical   | Country       | Year      | Sampling Type/Locations | Number Of Samples | Method          | LOD/LOQ (ng L <sup>-1</sup> ) | Frequency (Highest Value) (%) | Average (Highest Value) (ng L <sup>-1</sup> ) | Maximum (Highest Value) (ng L <sup>-1</sup> ) | Reference |
|------------------|---------------|-----------|-------------------------|-------------------|-----------------|-------------------------------|-------------------------------|-----------------------------------------------|-----------------------------------------------|-----------|
|                  |               |           |                         |                   |                 |                               | 21.0(21.0)                    | NA                                            | 32 228(32 228)                                |           |
| Fluoxetine (FLU) | Belgium       | 2013      | TP/2                    | 10                | SPE-LC-HRMS     | 8.6/29                        | 0                             | ND                                            | ND                                            | [1]       |
|                  | Canada        | 2007      | FP/1                    | 6                 | SPE-LC-MS/MS    | 0.05/NA                       | 100                           | 3.3                                           | 3.5                                           | [55]      |
|                  | China         | 2011      | GS/3                    | 19                | SPE-LC-MS/MS    | NA/4                          | 68                            | <LOQ                                          | <LOQ                                          | [3]       |
|                  | China         | 2011      | GS/3                    | 3                 | SPE-LC-MS/MS    | NA                            | 0                             | ND                                            | ND                                            | [2]       |
|                  | China         | 2012/2013 | GS/1                    | 4                 | SPE-LC-MS/MS    | 0.1/NA                        | NA                            | 40                                            | NA                                            | [45]      |
|                  | China         | 2014      | TP/5                    | 5                 | SPE-LC-MS/MS    | NA/0.2                        | 100                           | 2.6                                           | 4.7                                           | [4]       |
|                  | China         | 2014      | GS/3                    | 12                | SPE-LC-MS/MS    | 0.1/NA                        | 0                             | ND                                            | ND                                            | [46]      |
|                  | Croatia       | NA        | NA/5                    | 5                 | SPE-LC-MS/MS    | 35/100                        | NA                            | ND                                            | ND                                            | [14]      |
|                  | England       | NA        | GS/7                    | 109               | SPE-LC-MS/MS    | NA                            | 100                           | 31.3                                          | 175.9                                         | [43]      |
|                  | International | NA        | NA                      | NA                | NA              | NA                            | NA                            | 540                                           | 4000                                          | [11]      |
|                  | Norway        | 2005      | FP/3                    | 3                 | SPE-LC-MS/MS    | NA/0.12                       | 100                           | 1.4                                           | 2.4                                           | [56]      |
|                  | Norway        | 2007      | FP/2                    | 3                 | LPME-LC-MS/MS   | 0.150/0.490                   | 100                           | 8.4                                           | 18.7                                          | [57]      |
|                  | Portugal      | 2009      | GS/2                    | 2                 | SPE-LC-MS/MS    | 1/5                           | 0                             | ND                                            | ND                                            | [6]       |
|                  | Portugal      | 2011      | TP/1                    | 7                 | SPE-LC-MS/MS    | NA                            | NA                            | <LOQ                                          | 29.7                                          | [7]       |
|                  | Portugal      | 2013/2014 | FP/2                    | 18                | SPE-UHPLC-MS/MS | 0.08/0.24                     | 100                           | 8.77                                          | 17.8                                          | [20]      |
| Portugal         | NA            | GS/5      | 10                      | SPE-LC-MS         | 15/57           | 50                            | NA                            | 1704                                          | [53]                                          |           |

| Pharmaceutical          | Country       | Year      | Sampling Type/Locations | Number Of Samples | Method          | LOD/LOQ (ng L <sup>-1</sup> ) | Frequency (Highest Value) (%) | Average (Highest Value) (ng L <sup>-1</sup> ) | Maximum (Highest Value) (ng L <sup>-1</sup> ) | Reference |
|-------------------------|---------------|-----------|-------------------------|-------------------|-----------------|-------------------------------|-------------------------------|-----------------------------------------------|-----------------------------------------------|-----------|
|                         | Portugal      | NA        | TP/1                    | 48                | SPE-LC-MS       | 17/57                         | 42                            | NA                                            | 3465                                          | [8]       |
|                         | Spain         | NA        | NA/1                    | 12                | SPE-LC-MS/MS    | NA                            | NA                            | 585                                           | 1827                                          | [30]      |
|                         | Sweden        | 2013      | FP/1                    | 7                 | SPE-LC-MS/MS    | NA                            | 0                             | ND                                            | ND                                            | [13]      |
|                         | UK            | NA        | NA                      | NA                | NA              | NA                            | NA                            | NA                                            | 86                                            | [36]      |
|                         | USA           | 2010      | FP/1                    | 6                 | SPE-LC-MS/MS    | 3.5/10.5                      | 100                           | 20                                            | 95                                            | [22]      |
|                         |               |           |                         |                   |                 |                               | 57.3(100)                     | 68.9(585.0)                                   | 571.5(4000.0)                                 |           |
| Norfluoxetine (Nor-FLU) | Canada        | 2007      | FP/1                    | 6                 | SPE-LC-MS/MS    | 0.087/NA                      | 100                           | 3.0                                           | 4.2                                           | [55]      |
|                         | England       | NA        | GS/7                    | 109               | SPE-LC-MS/MS    | NA                            | 97                            | 15.4                                          | 118.0                                         | [43]      |
|                         | International | NA        | NA                      | NA                | NA              | NA                            | NA                            | 12                                            | 12                                            | [11]      |
|                         | Norway        | 2007      | FP/2                    | 3                 | LPME-LC-MS/MS   | 0.160/0.540                   | 100                           | 4.2                                           | 9.3                                           | [57]      |
|                         | Portugal      | 2011      | TP/1                    | 7                 | SPE-LC-MS/MS    | NA                            | 100                           | 112                                           | 226                                           | [7]       |
|                         | Portugal      | 2013/2014 | FP/2                    | 18                | SPE-UHPLC-MS/MS | 0.28/0.82                     | 11.1                          | 48.2                                          | 51.2                                          | [20]      |
|                         | UK            | NA        | NA                      | NA                | NA              | NA                            | NA                            | NA                                            | 63                                            | [36]      |
|                         |               |           |                         |                   |                 |                               | 81.6(100)                     | 32.5(112.0)                                   | 69.1(226.0)                                   |           |
| Paroxetine (PAR)        | Belgium       | 2013      | TP/2                    | 10                | SPE-LC-HRMS     | 202/674                       | 0                             | ND                                            | ND                                            | [1]       |
|                         | Canada        | 2007      | FP/1                    | 6                 | SPE-LC-MS/MS    | 0.096/NA                      | 100                           | 5.0                                           | 5.3                                           | [55]      |
|                         | China         | 2011      | GS/3                    | 19                | SPE-LC-MS/MS    | NA/60                         | 0                             | ND                                            | ND                                            | [3]       |
|                         | China         | 2011      | GS/3                    | 3                 | SPE-LC-MS/MS    | NA                            | 0                             | ND                                            | ND                                            | [2]       |

| Pharmaceutical   | Country        | Year      | Sampling Type/Locations | Number Of Samples | Method          | LOD/LOQ (ng L <sup>-1</sup> ) | Frequency (Highest Value) (%) | Average (Highest Value) (ng L <sup>-1</sup> ) | Maximum (Highest Value) (ng L <sup>-1</sup> ) | Reference |
|------------------|----------------|-----------|-------------------------|-------------------|-----------------|-------------------------------|-------------------------------|-----------------------------------------------|-----------------------------------------------|-----------|
|                  | Croatia        | NA        | NA/5                    | 5                 | SPE-LC-MS/MS    | 6/22                          | NA                            | ND                                            | ND                                            | [14]      |
|                  | International  | NA        | NA                      | NA                | NA              | NA                            | NA                            | 16                                            | 16                                            | [11]      |
|                  | Norway         | 2005      | FP/3                    | 3                 | SPE-LC-MS/MS    | NA/0.12                       | 100                           | 5.1                                           | 12.3                                          | [56]      |
|                  | Norway         | 2007      | FP/2                    | 3                 | LPME-LC-MS/MS   | 0.053/0.205                   | 100                           | 9.1                                           | 12.9                                          | [57]      |
|                  | Portugal       | 2009      | GS/2                    | 2                 | SPE-LC-MS/MS    | 1/3                           | 100                           | 75                                            | 105                                           | [6]       |
|                  | Portugal       | 2011      | TP/1                    | 7                 | SPE-LC-MS/MS    | NA                            | 0                             | ND                                            | ND                                            | [7]       |
|                  | Portugal       | 2013/2014 | FP/2                    | 18                | SPE-UHPLC-MS/MS | 4.32/13.1                     | 16.65                         | 22.8                                          | 23.6                                          | [20]      |
|                  | Portugal       | NA        | GS/5                    | 10                | SPE-LC-MS       | 27/89                         | 30                            | NA                                            | 1312                                          | [53]      |
|                  | Portugal       | NA        | TP/1                    | 48                | SPE-LC-MS       | 27/89                         | 44                            | NA                                            | 39 732                                        | [8]       |
|                  | Spain          | 2008/2009 | TP/3                    | 42                | SPE-LC-MS/MS    | NA/200                        | 0                             | ND                                            | ND                                            | [9]       |
|                  | Spain          | 2009      | TP/3                    | 14                | SPE-LC-MS/MS    | NA/270                        | 0                             | ND                                            | ND                                            | [9]       |
|                  |                |           |                         |                   |                 |                               | 37.7(100)                     | 10.2(75.0)                                    | 2747.9(39 732)                                |           |
| Sertraline (SER) | Canada         | 2007      | FP/1                    | 6                 | SPE-LC-MS/MS    | 0.048/NA                      | 100                           | 6.1                                           | 6.1                                           | [55]      |
|                  | China          | 2011      | GS/3                    | 19                | SPE-LC-MS/MS    | NA/8                          | 95                            | <LOQ                                          | <LOQ                                          | [3]       |
|                  | China          | 2011      | GS/3                    | 3                 | SPE-LC-MS/MS    | NA                            | 0                             | ND                                            | ND                                            | [2]       |
|                  | Czech Republic | 2011/2012 | TP/1                    | 136               | SPE-LC-MS/MS    | NA/3                          | 70                            | 12                                            | 27                                            | [15]      |
|                  | Greece         | 2013/2014 | TP/1                    | 24                | SPE-LC-MS/MS    | 1.5/4.9                       | 20.8                          | <LOD                                          | 21.0                                          | [25]      |



| Pharmaceutical                | Country  | Year      | Sampling Type/Locations | Number Of Samples | Method          | LOD/LOQ (ng L <sup>-1</sup> ) | Frequency (Highest Value) (%) | Average (Highest Value) (ng L <sup>-1</sup> ) | Maximum (Highest Value) (ng L <sup>-1</sup> ) | Reference |
|-------------------------------|----------|-----------|-------------------------|-------------------|-----------------|-------------------------------|-------------------------------|-----------------------------------------------|-----------------------------------------------|-----------|
|                               | India    | 2013      | GS/2                    | 7                 | SPE-LC-MS/MS    | NA/NA                         | 64                            | 31.5                                          | 91                                            | [5]       |
|                               | Norway   | 2005      | FP/3                    | 3                 | SPE-LC-MS/MS    | NA/0.29                       | 100                           | 2.1                                           | 2.5                                           | [56]      |
|                               | Norway   | 2007      | FP/2                    | 3                 | LPME-LC-MS/MS   | 0.160/0.520                   | 100                           | 12.5                                          | 19.8                                          | [57]      |
|                               | Portugal | 2011      | TP/1                    | 7                 | SPE-LC-MS/MS    | NA                            | 0                             | ND                                            | ND                                            | [7]       |
|                               | Portugal | 2013/2014 | FP/2                    | 18                | SPE-UHPLC-MS/MS | 0.34/1.02                     | 5.55                          | NA                                            | NA                                            | [20]      |
|                               | Portugal | NA        | TP/1                    | 48                | SPE-LC-MS       | NA                            | 0                             | ND                                            | ND                                            | [8]       |
|                               | Sweden   | 2013      | FP/1                    | 7                 | SPE-LC-MS/MS    | NA                            | 100                           | 36                                            | NA                                            | [13]      |
|                               | USA      | 2013      | TP/2                    | 14                | SPE-LC-MS/MS    | NA                            | 100                           | 62                                            | 114                                           | [10]      |
|                               |          |           |                         |                   |                 |                               | 58.1(100)                     | 13.5(62.0)                                    | 25.6(114.0)                                   |           |
| Desmethylsertraline (Nor-SER) | Canada   | 2007      | FP/1                    | 6                 | SPE-LC-MS/MS    | 0.072/NA                      | 100                           | 4.6                                           | 5                                             | [55]      |
|                               | Norway   | 2007      | FP/2                    | 3                 | LPME-LC-MS/MS   | 0.618/4.1                     | 33                            | 30.5                                          | 30.6                                          | [57]      |
|                               | USA      | 2013      | TP/2                    | 14                | SPE-LC-MS/MS    | NA                            | 100                           | 68                                            | 183                                           | [10]      |
|                               |          |           |                         |                   |                 |                               | 77.7(100)                     | 34.4(68.0)                                    | 72.9(183.0)                                   |           |
| Total                         |          |           |                         |                   |                 |                               | 62.2(100)                     | 48.8(585.0)                                   | 1291.3(39 732)                                |           |
| <i>Anti-inflammatories</i>    |          |           |                         |                   |                 |                               |                               |                                               |                                               |           |
| Diclofenac (DIC)              | Belgium  | 2013      | TP/2                    | 10                | SPE-LC-HRMS     | 35/118                        | 100                           | 1073                                          | NA                                            | [1]       |
|                               | Brazil   | 1997      | TP/1                    | 6                 | SPE-GC-MS       | NA                            | NA                            | 800                                           | NA                                            | [38]      |
|                               | Canada   | 2004      | TP/8                    | 8                 | SPE-GC-MS/MS    | 10/NA                         | 100                           | 170                                           | 2450                                          | [44]      |

| Pharmaceutical | Country       | Year      | Sampling Type/Locations | Number Of Samples | Method              | LOD/LOQ (ng L <sup>-1</sup> ) | Frequency (Highest Value) (%) | Average (Highest Value) (ng L <sup>-1</sup> ) | Maximum (Highest Value) (ng L <sup>-1</sup> ) | Reference |
|----------------|---------------|-----------|-------------------------|-------------------|---------------------|-------------------------------|-------------------------------|-----------------------------------------------|-----------------------------------------------|-----------|
|                | Canada        | NA        | TP/1                    | NA                | SPE-LDTD-APCI-MS/MS | 70/196                        | NA                            | 256                                           | NA                                            | [51]      |
|                | China         | 2009/2010 | GS/2                    | 24                | SPE-UPLC-MS/MS      | NA                            | 100                           | 286                                           | 438                                           | [39]      |
|                | China         | 2012/2013 | GS/1                    | 4                 | SPE-LC-MS/MS        | 0.1/NA                        | NA                            | 300                                           | NA                                            | [45]      |
|                | China         | 2014      | GS/3                    | 12                | SPE-LC-MS/MS        | 0.1/NA                        | 100                           | 49                                            | 71.8                                          | [46]      |
|                | Croatia       | NA        | NA/5                    | 5                 | SPE-LC-MS/MS        | 10/39                         | 100                           | 250                                           | 540                                           | [14]      |
|                | Greece        | 1998/1999 | NA/4                    | 11                | SPE-GC-MS           | 1/2                           | 0                             | 0                                             | 0                                             | [58]      |
|                | Greece        | 2009      | FP/2                    | 18                | SPE-GC-MS           | NA                            | NA                            | 1410                                          | 2170                                          | [59]      |
|                | Greece        | 2010/2011 | TP/8                    | 32                | SPE-LC-MS/MS        | NA                            | 94                            | 249                                           | 5164                                          | [40]      |
|                | Greece        | 2011      | FP/1                    | 8                 | SPE-LC-MS/MS        | 21/63.6                       | 100                           | 738                                           | 1001                                          | [16]      |
|                | Greece        | 2013/2014 | TP/1                    | 24                | SPE-LC-MS/MS        | 18.9/62.4                     | 37.5                          | 413                                           | 4869                                          | [25]      |
|                | International | NA        | NA                      | NA                | NA                  | NA                            | NA                            | NA                                            | 94 200                                        | [33]      |
|                | International | NA        | NA                      | NA                | NA                  | NA                            | NA                            | 1000                                          | 10 000                                        | [11]      |
|                | Kenya         | 2012/2013 | GS/3                    | 3                 | SPE-LC-MS           | NA/NA                         | 100                           | 1186.6                                        | 1510                                          | [26]      |
|                | Korea         | 2007      | GS/10                   | 10                | SPE-LC-MS/MS        | NA                            | NA                            | NA                                            | 30                                            | [27]      |
|                | Korea         | 2008      | GS/12                   | 30                | SPE-LC-MS/MS        | NA                            | 20                            | 237                                           | 523                                           | [28]      |
|                | Korea         | 2010      | NA/5                    | 5                 | SPE-LC-MS/MS        | NA                            | 100                           | 131                                           | 243                                           | [47]      |
|                | Luxembourg    | 2007/2008 | TP/1                    | 24                | SPE-LC-MS/MS        | 0.3/1.0                       | 100                           | NA                                            | 43                                            | [60]      |

| Pharmaceutical | Country               | Year      | Sampling Type/Locations | Number Of Samples | Method          | LOD/LOQ (ng L <sup>-1</sup> ) | Frequency (Highest Value) (%) | Average (Highest Value) (ng L <sup>-1</sup> ) | Maximum (Highest Value) (ng L <sup>-1</sup> ) | Reference |
|----------------|-----------------------|-----------|-------------------------|-------------------|-----------------|-------------------------------|-------------------------------|-----------------------------------------------|-----------------------------------------------|-----------|
|                | Malaysia              | 2013      | GS/4                    | 12                | SPE-LC-MS/MS    | NA/182                        | 42                            | 2008                                          | 5048                                          | [50]      |
|                | Mexico                | 2015/2016 | TP/2                    | 8                 | SPE-LC-MS/MS    | 5.5/18                        | 100                           | 1726.5                                        | 2470                                          | [41]      |
|                | NA                    | NA        | NA                      | 91                | NA              | NA                            | 81                            | 1340                                          | 4110                                          | [19]      |
|                | Portugal              | 2009      | GS/2                    | 2                 | SPE-LC-MS/MS    | 18/84                         | 100                           | 1014                                          | 1597                                          | [6]       |
|                | Portugal              | 2011      | TP/1                    | 7                 | SPE-LC-MS/MS    | NA                            | NA                            | 69.7                                          | 269                                           | [7]       |
|                | Portugal              | 2013/2014 | FP/2                    | 18                | SPE-UHPLC-MS/MS | 1.40/4.40                     | 5.55                          | 486                                           | 972                                           | [20]      |
|                | Portugal              | NA        | GS/5                    | 10                | SPE-LC-MS       | 7/24                          | 70                            | NA                                            | 6674                                          | [53]      |
|                | Portugal              | NA        | TP/1                    | 48                | SPE-LC-MS       | 7/24                          | 96                            | NA                                            | 64 479                                        | [8]       |
|                | Spain                 | 2003/2004 | TP/1                    | 10                | SPE-LC-MS/MS    | 100/NA                        | 100                           | 1500                                          | 3600                                          | [54]      |
|                | Spain                 | 2007/2009 | CS/3                    | 24                | SPE-LC-MS/MS    | 1.2/NA                        | NA                            | 1002                                          | NA                                            | [12]      |
|                | Spain                 | 2008/2009 | TP/3                    | 42                | SPE-LC-MS/MS    | NA/140                        | 100                           | 560                                           | 1490                                          | [9]       |
|                | Spain                 | 2009      | TP/3                    | 14                | SPE-LC-MS/MS    | NA/140                        | 36                            | 530                                           | 790                                           | [9]       |
|                | Spain                 | 2012      | GS/3                    | 21                | SPE-UPLC-MS/MS  | NA/20                         | 100                           | 21                                            | 121.8                                         | [42]      |
|                | Spain                 | NA        | NA                      | NA                | SPE-GC-MS       | NA/100                        | NA                            | NA                                            | 3600                                          | [61]      |
|                | Spain                 | NA        | NA/1                    | 12                | SPE-LC-MS/MS    | NA                            | NA                            | 232                                           | 561                                           | [30]      |
|                | Spain/Belgium/Germany | NA        | TP/NA                   | 14                | SPE-GC/LC-MS/MS | 7/20                          | NA                            | NA                                            | 148                                           | [62]      |
|                | Switzerland           | 2003/2004 | FP/5                    | 44                | SPE-GC-MS       | 6/20                          | 100                           | 1300                                          | 1900                                          | [63]      |

| Pharmaceutical  | Country | Year      | Sampling Type/Locations | Number Of Samples | Method          | LOD/LOQ (ng L <sup>-1</sup> ) | Frequency (Highest Value) (%) | Average (Highest Value) (ng L <sup>-1</sup> ) | Maximum (Highest Value) (ng L <sup>-1</sup> ) | Reference |
|-----------------|---------|-----------|-------------------------|-------------------|-----------------|-------------------------------|-------------------------------|-----------------------------------------------|-----------------------------------------------|-----------|
|                 | Sweden  | 2002      | FP/1                    | 1                 | SPE-GC/LC-MS/MS | NA                            | 100                           | 160                                           | 160                                           | [48]      |
|                 | Sweden  | 2013      | FP/1                    | 7                 | SPE-LC-MS/MS    | NA                            | 100                           | 615                                           | NA                                            | [13]      |
|                 | Taiwan  | NA        | GS/1                    | NA                | SPE-LC-MS/MS    | 1                             | NA                            | 57.8                                          | NA                                            | [24]      |
|                 | UK      | 2007      | GS/2                    | 20                | SPE-LC-MS/MS    | NA                            | 100                           | 165                                           | 1161                                          | [35]      |
|                 | UK      | NA        | NA                      | NA                | NA              | NA                            | NA                            | NA                                            | 1500                                          | [36]      |
|                 |         |           |                         |                   |                 |                               | 81.5(100)                     | 627.5(2008.0)                                 | 6397.2(94 200)                                |           |
| Ibuprofen (IBU) | Belgium | 2013      | TP/2                    | 10                | SPE-LC-HRMS     | 312/1051                      | 90                            | 6993                                          | NA                                            | [1]       |
|                 | Brazil  | 1997      | TP/1                    | 6                 | SPE-GC-MS       | NA                            | NA                            | 350                                           | NA                                            | [38]      |
|                 | Canada  | 2004      | TP/8                    | 8                 | SPE-GC-MS/MS    | 10/NA                         | 100                           | 6770                                          | 10 210                                        | [44]      |
|                 | China   | 2012/2013 | GS/1                    | 4                 | SPE-LC-MS/MS    | 0.1/NA                        | NA                            | 900                                           | NA                                            | [45]      |
|                 | China   | 2014      | GS/3                    | 12                | SPE-LC-MS/MS    | 0.1/NA                        | 100                           | 300                                           | 406                                           | [46]      |
|                 | Croatia | NA        | NA/5                    | 5                 | SPE-LC-MS/MS    | 12/20                         | NA                            | 516                                           | 900                                           | [14]      |
|                 | Greece  | 1998/1999 | NA/4                    | 11                | SPE-GC-MS       | 0.6/1.6                       | 100                           | NA                                            | 560                                           | [58]      |
|                 | Greece  | 2009      | FP/2                    | 18                | SPE-GC-MS       | NA                            | NA                            | 820                                           | 1440                                          | [59]      |
|                 | Greece  | 2010/2011 | TP/8                    | 32                | SPE-LC-MS/MS    | NA                            | 59                            | 711                                           | 8890                                          | [40]      |
|                 | Greece  | 2011      | FP/1                    | 8                 | SPE-LC-MS/MS    | 16/47                         | 100                           | 1269                                          | 1928                                          | [16]      |
|                 | India   | 2013      | GS/2                    | 7                 | SPE-LC-MS/MS    | NA/NA                         | 85.5                          | 1300                                          | 2800                                          | [5]       |
| International   | NA      | NA        | NA                      | NA                | NA              | NA                            | NA                            | 603 000                                       | [33]                                          |           |

| Pharmaceutical | Country       | Year      | Sampling Type/Locations | Number Of Samples | Method          | LOD/LOQ (ng L <sup>-1</sup> ) | Frequency (Highest Value) (%) | Average (Highest Value) (ng L <sup>-1</sup> ) | Maximum (Highest Value) (ng L <sup>-1</sup> ) | Reference |
|----------------|---------------|-----------|-------------------------|-------------------|-----------------|-------------------------------|-------------------------------|-----------------------------------------------|-----------------------------------------------|-----------|
|                | International | NA        | NA                      | NA                | NA              | NA                            | NA                            | 37 000                                        | 700 000                                       | [11]      |
|                | Japan         | 2001/2003 | TP/5                    | 12                | SPE-GC-MS       | NA                            | NA                            | 672                                           | 1130                                          | [52]      |
|                | Kenya         | 2012/2013 | GS/3                    | 3                 | SPE-LC-MS       | NA/NA                         | 100                           | 8400                                          | 10550                                         | [26]      |
|                | Korea         | 2007      | GS/10                   | 10                | SPE-LC-MS/MS    | NA                            | NA                            | NA                                            | 1050                                          | [27]      |
|                | Korea         | 2008      | GS/12                   | 30                | SPE-LC-MS/MS    | NA                            | 0                             | ND                                            | ND                                            | [28]      |
|                | Korea         | 2010      | NA/5                    | 5                 | SPE-LC-MS/MS    | NA                            | 100                           | 2265                                          | 2853                                          | [47]      |
|                | Luxembourg    | 2007/2008 | TP/1                    | 24                | SPE-LC-MS/MS    | 0.3/1.0                       | 100                           | NA                                            | 3080                                          | [60]      |
|                | Mexico        | 2015/2016 | TP/2                    | 8                 | SPE-LC-MS/MS    | 12/39                         | NA                            | 1396.5                                        | 2835                                          | [41]      |
|                | NA            | NA        | NA                      | 101               | NA              | NA                            | 97                            | 14 600                                        | 83 500                                        | [19]      |
|                | Portugal      | 2009      | GS/2                    | 2                 | SPE-LC-MS/MS    | 65/219                        | 100                           | 2790                                          | 3588                                          | [6]       |
|                | Portugal      | 2011      | TP/1                    | 7                 | SPE-LC-MS/MS    | NA                            | NA                            | 1596                                          | 496                                           | [7]       |
|                | Portugal      | 2013/2014 | FP/2                    | 18                | SPE-UHPLC-MS/MS | 32.9/110                      | 100                           | 11994.5                                       | 24505                                         | [20]      |
|                | Portugal      | NA        | GS/5                    | 10                | SPE-LC-MS       | 14/46                         | 80                            | NA                                            | 106 490                                       | [53]      |
|                | Portugal      | NA        | TP/1                    | 48                | SPE-LC-MS       | 14/46                         | 60                            | NA                                            | 40 168                                        | [8]       |
|                | South Africa  | 2013      | GS/3                    | 3                 | SPE-LC-MS/MS    | 244/813                       | NA                            | 5760                                          | NA                                            | [34]      |
|                | Spain         | 2003/2004 | TP/1                    | 10                | SPE-LC-MS/MS    | 23/NA                         | 100                           | 8400                                          | 168 000                                       | [54]      |
|                | Spain         | 2008/2009 | TP/3                    | 42                | SPE-LC-MS/MS    | NA/640                        | 98                            | 12 400                                        | 39 800                                        | [9]       |

| Pharmaceutical | Country               | Year      | Sampling Type/Locations | Number Of Samples | Method          | LOD/LOQ (ng L <sup>-1</sup> ) | Frequency (Highest Value) (%) | Average (Highest Value) (ng L <sup>-1</sup> ) | Maximum (Highest Value) (ng L <sup>-1</sup> ) | Reference |
|----------------|-----------------------|-----------|-------------------------|-------------------|-----------------|-------------------------------|-------------------------------|-----------------------------------------------|-----------------------------------------------|-----------|
|                | Spain                 | 2009      | TP/3                    | 14                | SPE-LC-MS/MS    | NA/730                        | 100                           | 14 600                                        | 19 100                                        | [9]       |
|                | Spain                 | 2011/2012 | NA/1                    | 5                 | SPE-LC-MS/MS    | 20.0/66.5                     | 100                           | 10 728                                        | 13 740                                        | [64]      |
|                | Spain                 | 2012      | GS/3                    | 21                | SPE-UPLC-MS/MS  | NA/30                         | 100                           | 4374                                          | 9938.3                                        | [42]      |
|                | Spain                 | NA        | NA/1                    | 12                | SPE-LC-MS/MS    | NA                            | NA                            | 2687                                          | 4113                                          | [30]      |
|                | Spain/Belgium/Germany | NA        | TP/NA                   | 14                | SPE-GC/LC-MS/MS | 12/42                         | NA                            | NA                                            | 860                                           | [62]      |
|                | Sweden                | 2002      | FP/1                    | 1                 | SPE-GC/LC-MS/MS | NA                            | 100                           | 3590                                          | 3590                                          | [48]      |
|                | Sweden                | 2013      | FP/1                    | 7                 | SPE-LC-MS/MS    | NA                            | NA                            | 7755                                          | NA                                            | [13]      |
|                | Switzerland           | 2003/2004 | FP/4                    | 44                | SPE-GC-MS       | 8/30                          | 100                           | 2680                                          | 3100                                          | [63]      |
|                | Taiwan                | NA        | GS/1                    | NA                | SPE-LC-MS/MS    | 5                             | NA                            | 2500                                          | NA                                            | [24]      |
|                | UK                    | 2007      | GS/2                    | 20                | SPE-LC-MS/MS    | NA                            | 100                           | 1988                                          | 6328                                          | [35]      |
|                | UK                    | NA        | NA                      | NA                | NA              | NA                            | NA                            | NA                                            | 33 764                                        | [36]      |
|                | USA                   | 2010      | FP/1                    | 6                 | SPE-LC-MS/MS    | 4.7/14                        | 100                           | 2100                                          | 11 000                                        | [22]      |
|                |                       |           |                         |                   |                 |                               | 90.8(100)                     | 5459.9(37 000)                                | 54 963.2(700 000)                             |           |
| Naproxen (NAP) | Belgium               | 2013      | TP/2                    | 10                | SPE-LC-HRMS     | 689/2295                      | 24                            | 3068                                          | NA                                            | [1]       |
|                | Brazil                | 1997      | TP/1                    | 6                 | SPE-GC-MS       | NA                            | NA                            | 600                                           | NA                                            | [38]      |
|                | Canada                | 2004      | TP/8                    | 8                 | SPE-GC-MS/MS    | 10/NA                         | 100                           | 2760                                          | 6030                                          | [44]      |

| Pharmaceutical | Country       | Year      | Sampling Type/Locations | Number Of Samples | Method        | LOD/LOQ (ng L <sup>-1</sup> ) | Frequency (Highest Value) (%) | Average (Highest Value) (ng L <sup>-1</sup> ) | Maximum (Highest Value) (ng L <sup>-1</sup> ) | Reference |
|----------------|---------------|-----------|-------------------------|-------------------|---------------|-------------------------------|-------------------------------|-----------------------------------------------|-----------------------------------------------|-----------|
|                | China         | 2012/2013 | GS/1                    | 4                 | SPE-LC-MS/MS  | 0.1/NA                        | NA                            | 60                                            | NA                                            | [45]      |
|                | China         | 2014      | GS/3                    | 12                | SPE-LC-MS/MS  | 0.1/NA                        | 92                            | 13                                            | 30.6                                          | [46]      |
|                | Croatia       | NA        | NA/5                    | 5                 | SPE-LC-MS/MS  | 9/32                          | NA                            | 99                                            | 190                                           | [14]      |
|                | Greece        | 2009      | FP/2                    | 18                | SPE-GC-MS     | NA                            | NA                            | 935                                           | 2670                                          | [59]      |
|                | Greece        | 2010/2011 | TP/8                    | 32                | SPE-LC-MS/MS  | NA                            | 72                            | 856                                           | 5810                                          | [40]      |
|                | Greece        | 2011      | FP/1                    | 8                 | SPE-LC-MS/MS  | 16/47                         | 100                           | 942                                           | 1363                                          | [16]      |
|                | Greece        | 2013/2014 | TP/1                    | 24                | SPE-LC-MS/MS  | 23.5/77.6                     | 37.5                          | 133                                           | 648                                           | [25]      |
|                | International | NA        | NA                      | NA                | NA            | NA                            | NA                            | NA                                            | 52 900                                        | [33]      |
|                | International | NA        | NA                      | NA                | NA            | NA                            | NA                            | 6000                                          | 100 000                                       | [11]      |
|                | Japan         | 2001/2003 | TP/5                    | 12                | SPE-GC-MS     | NA                            | NA                            | 100                                           | 230                                           | [52]      |
|                | Korea         | 2007      | GS/10                   | 10                | SPE-LC-MS/MS  | NA                            | NA                            | NA                                            | 1050                                          | [27]      |
|                | Korea         | 2008      | GS/12                   | 30                | SPE-LC-MS/MS  | NA                            | 57                            | 3810                                          | 12 500                                        | [28]      |
|                | Korea         | 2010      | NA/5                    | 5                 | SPE-LC-MS/MS  | NA                            | 100                           | 2584                                          | 5033                                          | [47]      |
|                | Mexico        | 2015/2016 | TP/2                    | 8                 | SPE- LC-MS/MS | 14/46                         | 100                           | 2500                                          | 4210                                          | [41]      |
|                | NA            | NA        | NA                      | 45                | NA            | NA                            | 96                            | 26 400                                        | 611 000                                       | [19]      |
|                | Portugal      | 2009      | GS/2                    | 2                 | SPE-LC-MS/MS  | 14/47                         | 100                           | 3029                                          | 3474                                          | [6]       |
|                | Portugal      | 2011      | TP/1                    | 7                 | SPE-LC-MS/MS  | NA                            | 100                           | 741                                           | 1617                                          | [7]       |

| Pharmaceutical | Country               | Year      | Sampling Type/Locations | Number Of Samples | Method          | LOD/LOQ (ng L <sup>-1</sup> ) | Frequency (Highest Value) (%) | Average (Highest Value) (ng L <sup>-1</sup> ) | Maximum (Highest Value) (ng L <sup>-1</sup> ) | Reference |
|----------------|-----------------------|-----------|-------------------------|-------------------|-----------------|-------------------------------|-------------------------------|-----------------------------------------------|-----------------------------------------------|-----------|
|                | Portugal              | 2013/2014 | FP/2                    | 18                | SPE-UHPLC-MS/MS | 0.10/0.40                     | 100                           | 592.5                                         | 3245                                          | [20]      |
|                | Portugal              | NA        | GS/5                    | 10                | SPE-LC-MS       | 18/59                         | 20                            | NA                                            | 3894                                          | [53]      |
|                | Portugal              | NA        | TP/1                    | 48                | SPE-LC-MS       | 18/59                         | 15                            | NA                                            | 244                                           | [8]       |
|                | Spain                 | 2007/2009 | CS/3                    | 24                | SPE-LC-MS/MS    | 6.3/NA                        | NA                            | 5464                                          | NA                                            | [12]      |
|                | Spain                 | 2008/2009 | TP/3                    | 42                | SPE-LC-MS/MS    | NA/50                         | 100                           | 1550                                          | 3580                                          | [9]       |
|                | Spain                 | 2009      | TP/3                    | 14                | SPE-LC-MS/MS    | NA/80                         | 100                           | 1320                                          | 2240                                          | [9]       |
|                | Spain                 | 2012      | GS/3                    | 21                | SPE-UPLC-MS/MS  | NA/8                          | 100                           | 2399                                          | 5871                                          | [42]      |
|                | Spain                 | NA        | NA/1                    | 12                | SPE-LC-MS/MS    | NA                            | NA                            | 2363                                          | 5228                                          | [30]      |
|                | Spain/Belgium/Germany | NA        | TP/NA                   | 14                | SPE-GC/LC-MS/MS | 26/75                         | NA                            | NA                                            | 455                                           | [62]      |
|                | Sweden                | 2002      | FP/1                    | 1                 | SPE-GC/LC-MS/MS | NA                            | 100                           | 3650                                          | 3650                                          | [48]      |
|                | Sweden                | 2013      | FP/1                    | 7                 | SPE-LC-MS/MS    | NA                            | NA                            | 8006                                          | NA                                            | [13]      |
|                | Taiwan                | NA        | GS/1                    | NA                | SPE-LC-MS/MS    | 5                             | NA                            | 432                                           | NA                                            | [24]      |
|                | UK                    | 2007      | GS/2                    | 20                | SPE-LC-MS/MS    | NA                            | 100                           | 1006                                          | 3504                                          | [35]      |
|                | UK                    | NA        | NA                      | NA                | NA              | NA                            | NA                            | NA                                            | 1173                                          | [36]      |
|                | USA                   | 2010      | FP/1                    | 6                 | SPE-LC-MS/MS    | 1.0/2.9                       | 100                           | 3000                                          | 9400                                          | [22]      |
|                |                       |           |                         |                   |                 |                               | 81.6(100)                     | 2910.8(26 400)                                | 29 353.1(611 000)                             |           |



| Pharmaceutical     | Country       | Year      | Sampling Type/Locations | Number Of Samples | Method       | LOD/LOQ (ng L <sup>-1</sup> ) | Frequency (Highest Value) (%) | Average (Highest Value) (ng L <sup>-1</sup> ) | Maximum (Highest Value) (ng L <sup>-1</sup> ) | Reference |
|--------------------|---------------|-----------|-------------------------|-------------------|--------------|-------------------------------|-------------------------------|-----------------------------------------------|-----------------------------------------------|-----------|
| Paracetamol (PARA) | Belgium       | 2013      | TP/2                    | 10                | SPE-LC-HRMS  | 1217/4057                     | 100                           | 60 546                                        | ND                                            | [1]       |
|                    | China         | 2012/2013 | GS/1                    | 4                 | SPE-LC-MS/MS | 0.1/NA                        | NA                            | 100 000                                       | NA                                            | [45]      |
|                    | China         | 2014      | GS/3                    | 12                | SPE-LC-MS/MS | 0.1/NA                        | 100                           | 1900                                          | 3480                                          | [46]      |
|                    | Croatia       | NA        | NA/5                    | 5                 | SPE-LC-MS/MS | 10/58                         | 100                           | 10 194                                        | 26 090                                        | [14]      |
|                    | Greece        | 2010/2011 | TP/8                    | 32                | SPE-LC-MS/MS | NA                            | 88                            | 6465                                          | 65 403                                        | [40]      |
|                    | Greece        | 2011      | FP/1                    | 8                 | SPE-LC-MS/MS | 23/64.2                       | 100                           | 29 635                                        | 81 016                                        | [16]      |
|                    | Greece        | 2013/2014 | TP/1                    | 24                | SPE-LC-MS/MS | 15.2/50                       | 100                           | 1422                                          | 2452                                          | [25]      |
|                    | International | NA        | NA                      | NA                | NA           | NA                            | NA                            | NA                                            | 56 900                                        | [33]      |
|                    | International | NA        | NA                      | NA                | NA           | NA                            | NA                            | 38 000                                        | 500 000                                       | [11]      |
|                    | Kenya         | 2012/2013 | GS/3                    | 3                 | SPE-LC-MS    | NA/NA                         | 100                           | 110887                                        | 161290                                        | [26]      |
|                    | Korea         | 2007      | GS/10                   | 10                | SPE-LC-MS/MS | NA                            | NA                            | NA                                            | 10 000                                        | [27]      |
|                    | Korea         | 2008      | GS/12                   | 30                | SPE-LC-MS/MS | NA                            | 97                            | 13 200                                        | 51 900                                        | [28]      |
|                    | Korea         | 2010      | NA/5                    | 5                 | SPE-LC-MS/MS | NA                            | 100                           | 7460                                          | 10 234                                        | [47]      |
|                    | NA            | NA        | NA                      | 5                 | NA           | NA                            | 100                           | 80 000                                        | 292 000                                       | [19]      |
|                    | Portugal      | 2009      | GS/2                    | 2                 | SPE-LC-MS/MS | 7/25                          | 100                           | 17 931                                        | 20 074                                        | [6]       |
|                    | Portugal      | 2011      | TP/1                    | 7                 | SPE-LC-MS/MS | NA                            | 100                           | 2463                                          | 9286                                          | [7]       |
|                    | Portugal      | NA        | TP/1                    | 48                | SPE-LC-MS    | 3/9                           | 6                             | NA                                            | 342                                           | [8]       |
| South Africa       | 2013          | GS/3      | 3                       | SPE-LC-MS/MS      | 8.1/273      | NA                            | 6260                          | NA                                            | [34]                                          |           |

| Pharmaceutical | Country       | Year      | Sampling Type/Locations | Number Of Samples | Method       | LOD/LOQ (ng L <sup>-1</sup> ) | Frequency (Highest Value) (%) | Average (Highest Value) (ng L <sup>-1</sup> ) | Maximum (Highest Value) (ng L <sup>-1</sup> ) | Reference |
|----------------|---------------|-----------|-------------------------|-------------------|--------------|-------------------------------|-------------------------------|-----------------------------------------------|-----------------------------------------------|-----------|
|                | Spain         | 2003/2004 | TP/1                    | 10                | SPE-LC-MS/MS | 32/NA                         | 100                           | 134 000                                       | 246 000                                       | [54]      |
|                | Spain         | 2008/2009 | TP/3                    | 42                | SPE-LC-MS/MS | NA/110                        | 100                           | 44 800                                        | 201 000                                       | [9]       |
|                | Spain         | 2009      | TP/3                    | 14                | SPE-LC-MS/MS | NA/190                        | 100                           | 55 100                                        | 134 000                                       | [9]       |
|                | Spain         | NA        | NA/1                    | 12                | SPE-LC-MS/MS | NA                            | NA                            | 23 202                                        | 37 458                                        | [30]      |
|                | Sweden        | 2013      | FP/1                    | 7                 | SPE-LC-MS/MS | NA                            | 100                           | 95 454                                        | NA                                            | [13]      |
|                | Taiwan        | NA        | GS/1                    | NA                | SPE-LC-MS/MS | 0.1                           | NA                            | 2695                                          | NA                                            | [24]      |
|                | UK            | 2007      | GS/2                    | 20                | SPE-LC-MS/MS | NA                            | 100                           | 194 748                                       | 482 687                                       | [35]      |
|                | UK            | NA        | NA                      | NA                | NA           | NA                            | NA                            | NA                                            | 492 349                                       | [43]      |
|                | USA           | 2010      | TP/1                    | 6                 | SPE-LC-MS/MS | 2.6/8.7                       | NA                            | 2800                                          | NA                                            | [37]      |
|                | USA           | 2010      | FP/1                    | 6                 | SPE-LC-MS/MS | 2.5/7.5                       | 100                           | 18 000                                        | 150 000                                       | [22]      |
|                |               |           |                         |                   |              |                               | 94.3(100)                     | 44 048.4(194 748)                             | 131 911.3(500 000)                            |           |
| Total          |               |           |                         |                   |              |                               | 86.6(100)                     | 11 192.4(194 748)                             | 49 449.3(700 000)                             |           |
| Hormones       |               |           |                         |                   |              |                               |                               |                                               |                                               |           |
| Estrone (E1)   | Canada        | 2004      | TP/8                    | 8                 | SPE-GC-MS/MS | 1/NA                          | 100                           | 16                                            | 52                                            | [44]      |
|                | Germany       | 2002      | NA/1                    | 18                | SPE-LC-MS/MS | NA/1                          | 100                           | 188                                           | NA                                            | [65]      |
|                | International | NA        | 7                       | 70                | NA           | NA                            | NA                            | 53.9                                          | 132                                           | [66]      |
|                | International | NA        | NA                      | NA                | NA           | NA                            | NA                            | NA                                            | 170                                           | [33]      |
|                | International | NA        | NA                      | NA                | NA           | NA                            | NA                            | 80                                            | 900                                           | [11]      |

| Pharmaceutical     | Country       | Year      | Sampling Type/Locations | Number Of Samples | Method              | LOD/LOQ (ng L <sup>-1</sup> ) | Frequency (Highest Value) (%) | Average (Highest Value) (ng L <sup>-1</sup> ) | Maximum (Highest Value) (ng L <sup>-1</sup> ) | Reference |
|--------------------|---------------|-----------|-------------------------|-------------------|---------------------|-------------------------------|-------------------------------|-----------------------------------------------|-----------------------------------------------|-----------|
|                    | Italy         | 2002      | FP/1                    | 7                 | SPE-LC-MS/MS        | 1.2/NA                        | 100                           | 35                                            | 60                                            | [67]      |
|                    | Japan         | 2001/2003 | TP/5                    | 12                | SPE-GC-MS           | NA                            | NA                            | NA                                            | 200                                           | [52]      |
|                    | Korea         | 2010      | NA/5                    | 5                 | SPE-LC-MS/MS        | NA                            | 100                           | 47                                            | 70                                            | [47]      |
|                    | Luxembourg    | 2007/2008 | TP/1                    | 24                | SPE-LC-MS/MS        | 0.3/1.0                       | NA                            | NA                                            | 9                                             | [60]      |
|                    | NA            | NA        | NA                      | 109               | NA                  | NA                            | 100                           | 67.2                                          | 670                                           | [19]      |
|                    | Portugal      | NA        | GS/5                    | 10                | SPE-LC-MS           | 18/60                         | 20                            | NA                                            | 2484                                          | [53]      |
|                    | Portugal      | NA        | TP/1                    | 48                | SPE-LC-MS           | 18/60                         | 40                            | NA                                            | 177                                           | [8]       |
|                    | UK            | NA        | NA                      | NA                | NA                  | NA                            | NA                            | 49                                            | NA                                            | [43]      |
|                    | USA           | 2010      | FP/1                    | 6                 | SPE-LC-MS/MS        | 2.2/6.7                       | NA                            | 64                                            | 350                                           | [22]      |
|                    |               |           |                         |                   |                     |                               | 80.0(100)                     | 66.7(188.0)                                   | 439.5(2484.0)                                 |           |
| 17β-estradiol (E2) | Canada        | 2004      | TP/8                    | 8                 | SPE-GC-MS/MS        | 1/NA                          | 100                           | 9                                             | 22                                            | [44]      |
|                    | Canada        | NA        | TP/1                    | NA                | SPE-LDTD-APCI-MS/MS | 162/195                       | NA                            | 310                                           | NA                                            | [51]      |
|                    | Germany       | 2002      | NA/1                    | 18                | SPE-LC-MS/MS        | NA/2                          | 100                           | 11.8                                          | NA                                            | [65]      |
|                    | International | NA        | 7                       | 70                | NA                  | NA                            | NA                            | 12.0                                          | 25                                            | [66]      |
|                    | International | NA        | NA                      | NA                | NA                  | NA                            | NA                            | NA                                            | 50                                            | [33]      |
|                    | International | NA        | NA                      | NA                | NA                  | NA                            | NA                            | 250                                           | 5000                                          | [11]      |
|                    | Italy         | 2002      | FP/1                    | 7                 | SPE-LC-MS/MS        | 1.9/NA                        | 100                           | 25                                            | 31                                            | [67]      |
|                    | Japan         | 2001/2003 | TP/5                    | 12                | SPE-GC-MS           | NA                            | NA                            | NA                                            | 30                                            | [52]      |
|                    | Korea         | 2010      | NA/5                    | 5                 | SPE-LC-MS/MS        | NA                            | NA                            | 4                                             | 4                                             | [47]      |

| Pharmaceutical                         | Country       | Year      | Sampling Type/Locations | Number Of Samples | Method              | LOD/LOQ (ng L <sup>-1</sup> ) | Frequency (Highest Value) (%) | Average (Highest Value) (ng L <sup>-1</sup> ) | Maximum (Highest Value) (ng L <sup>-1</sup> ) | Reference |
|----------------------------------------|---------------|-----------|-------------------------|-------------------|---------------------|-------------------------------|-------------------------------|-----------------------------------------------|-----------------------------------------------|-----------|
|                                        | Luxembourg    | 2007/2008 | TP/1                    | 24                | SPE-LC-MS/MS        | 1.0/3.0                       | NA                            | NA                                            | 102                                           | [60]      |
|                                        | NA            | NA        | NA                      | 108               | NA                  | NA                            | 100                           | 22.2                                          | 12.5                                          | [19]      |
|                                        | Portugal      | NA        | GS/5                    | 10                | SPE-LC-MS           | 4/12                          | 10                            | NA                                            | 344                                           | [53]      |
|                                        | Portugal      | NA        | TP/1                    | 48                | SPE-LC-MS           | 4/12                          | 17                            | NA                                            | 937                                           | [8]       |
|                                        | UK            | NA        | NA                      | NA                | NA                  | NA                            | NA                            | 20                                            | NA                                            | [43]      |
|                                        |               |           |                         |                   |                     |                               | 71.2(100)                     | 73.8(310.0)                                   | 596.1(5000.0)                                 |           |
| 17 $\alpha$ -estradiol ( $\alpha$ -E2) | NA            | NA        | NA                      | 36                | NA                  | NA                            | 100                           | 7.4                                           | 17.2                                          | [19]      |
|                                        | USA           | 2010      | FP/1                    | 6                 | SPE-LC-MS/MS        | 1.2/3.5                       | NA                            | <LOQ                                          | 10 000                                        | [22]      |
|                                        |               |           |                         |                   |                     |                               | 100(100)                      | 3.7(7.4)                                      | 5008.6(10 000)                                |           |
| 17 $\alpha$ -ethinylestradiol (EE2)    | Canada        | NA        | TP/1                    | NA                | SPE-LDTD-APCI-MS/MS | 140/203                       | NA                            | 388                                           | NA                                            | [51]      |
|                                        | Germany       | 2002      | NA/1                    | 18                | SPE-LC-MS/MS        | NA/2                          | 100                           | 8.8                                           | NA                                            | [65]      |
|                                        | International | NA        | NA/7                    | 70                | NA                  | NA                            | NA                            | 3.7                                           | 13                                            | [66]      |
|                                        | International | NA        | NA                      | NA                | NA                  | NA                            | NA                            | NA                                            | 3                                             | [33]      |
|                                        | International | NA        | NA                      | NA                | NA                  | NA                            | NA                            | 20                                            | 80                                            | [11]      |
|                                        | Luxembourg    | 2007/2008 | TP/1                    | 24                | SPE-LC-MS/MS        | 2.0/6.0                       | NA                            | NA                                            | 24                                            | [60]      |
|                                        | NA            | NA        | NA                      | 70                | NA                  | NA                            | 91                            | 4.2                                           | 70                                            | [19]      |
|                                        | Portugal      | NA        | GS/5                    | 10                | SPE-LC-MS           | 21/69                         | 20                            | NA                                            | 106                                           | [53]      |
|                                        | Portugal      | NA        | TP/1                    | 48                | SPE-LC-MS           | 21/69                         | 25                            | NA                                            | 80                                            | [8]       |
|                                        | UK            | NA        | NA                      | NA                | NA                  | NA                            | NA                            | 1.0                                           | NA                                            | [43]      |
| USA                                    | 2010          | FP/1      | 6                       | SPE-LC-MS/MS      | 1.3/3.8             | NA                            | <LOQ                          | 9.4                                           | [22]                                          |           |
|                                        |               |           |                         |                   |                     |                               | 59.0(100)                     | 60.8(388.0)                                   | 48.2(106.0)                                   |           |
| <b>Total</b>                           |               |           |                         |                   |                     |                               | <b>73.5(100)</b>              | <b>62.9(388.0)</b>                            | <b>673.8(10 000)</b>                          |           |

CS - Composite sampling  
FP - Flow proportional sampling  
FD - Fluorescence detection  
GC - Gas chromatography

GS - Grab sampling  
HPLC - High performance liquid chromatography  
HRMS - High resolution mass spectrum  
LC - Liquid chromatography  
LDTD-APCI - Laser diode thermal desorption atmospheric pressure chemical ionization  
LPME - Liquid-phase microextraction  
LOQ - Limit of quantification  
MS - Mass spectrometry  
NA - Not available  
ND - Not detected  
SPE - Solid phase extraction  
TP - Time proportional sampling  
UPLC - Ultra performance liquid chromatography  
UHPLC - Ultra high performance liquid chromatography

**Table S3. Occurrence of pharmaceuticals in wastewater effluents (WWEs).**

| Pharmaceutical     | Country  | Year      | Sampling Type/Locations | Number Of Samples | Method          | LOD/LOQ (ng L <sup>-1</sup> ) | Frequency (Highest Value) (%) | Average (Highest Value) (ng L <sup>-1</sup> ) | Maximum (Highest Value) (ng L <sup>-1</sup> ) | Reference |
|--------------------|----------|-----------|-------------------------|-------------------|-----------------|-------------------------------|-------------------------------|-----------------------------------------------|-----------------------------------------------|-----------|
| <b>Anxiolytics</b> |          |           |                         |                   |                 |                               |                               |                                               |                                               |           |
| Alprazolam (ALP)   | Belgium  | 2013      | TP/2                    | 10                | SPE-ESI-HRMS-LC | 6.6/22                        | 20                            | 23                                            | NA                                            | [1]       |
|                    | China    | 2011      | GS/3                    | 19                | SPE-LC-MS/MS    | NA/10                         | 31                            | <LOQ                                          | <LOQ                                          | [3]       |
|                    | China    | 2011      | GS/3                    | 3                 | SPE-LC-MS/MS    | NA                            | 0                             | ND                                            | ND                                            | [2]       |
|                    | China    | 2014      | TP/5                    | 5                 | SPE-LC-MS/MS    | NA/0.1                        | 100                           | 4.9                                           | 6                                             | [4]       |
|                    | EU       | 2010      | GS/90                   | 90                | SPE-LC-MS/MS    | NA/10                         | 8                             | 1.3                                           | 33.0                                          | [68]      |
|                    | India    | 2013      | GS/2                    | 7                 | SPE-LC-MS/MS    | NA/NA                         | 29                            | 29                                            | 57                                            | [5]       |
|                    | Portugal | 2009      | GS/2                    | 2                 | SPE-LC-MS/MS    | 1/4                           | 0                             | ND                                            | ND                                            | [6]       |
|                    | Portugal | 2011      | TP/1                    | 7                 | SPE-LC-MS/MS    | NA                            | 100                           | 27.5                                          | 33.5                                          | [7]       |
|                    | Spain    | 2008/2009 | TP/3                    | 42                | SPE-LC-MS/MS    | NA/10                         | 38                            | <LOQ                                          | <LOQ                                          | [9]       |
|                    | Spain    | 2009      | TP/3                    | 14                | SPE-LC-MS/MS    | NA/10                         | 100                           | 10                                            | 10                                            | [9]       |
|                    | USA      | 2011      | TP/50                   | 50                | SPE-LC-MS/MS    | 9.1/NA                        | 30                            | 10                                            | 31                                            | [69]      |
| USA                | 2013     | TP/2      | 14                      | SPE-LC-MS/MS      | NA              | 100                           | 5                             | 8                                             | [10]                                          |           |
|                    |          |           |                         |                   |                 | 46.3(100)                     | 9.2(29.0)                     | 16.2(57.0)                                    |                                               |           |
| Lorazepam (LOR)    | China    | 2011      | GS/3                    | 19                | SPE-LC-MS/MS    | NA/70                         | 50                            | <LOQ                                          | <LOQ                                          | [3]       |
|                    | China    | 2011      | GS/3                    | 3                 | SPE-LC-MS/MS    | NA                            | 0                             | ND                                            | ND                                            | [2]       |

| Pharmaceutical | Country       | Year      | Sampling Type/Locations | Number Of Samples | Method       | LOD/LOQ (ng L <sup>-1</sup> ) | Frequency (Highest Value) (%) | Average (Highest Value) (ng L <sup>-1</sup> ) | Maximum (Highest Value) (ng L <sup>-1</sup> ) | Reference |
|----------------|---------------|-----------|-------------------------|-------------------|--------------|-------------------------------|-------------------------------|-----------------------------------------------|-----------------------------------------------|-----------|
|                | China         | 2014      | TP/5                    | 5                 | SPE-LC-MS/MS | NA/4.1                        | 100                           | NA                                            | 3.6                                           | [4]       |
|                | India         | 2013      | GS/2                    | 7                 | SPE-LC-MS/MS | NA/NA                         | 57                            | 17.5                                          | 47                                            | [5]       |
|                | International | NA        | NA                      | NA                | NA           | NA                            | NA                            | 200                                           | 200                                           | [11]      |
|                | Italy         | 2010      | CS/1                    | 4                 | SPE-LC-MS/MS | NA                            | NA                            | 105                                           | NA                                            | [70]      |
|                | Italy         | 2011      | TP/2                    | 6                 | SPE-LC-MS/MS | NA/17                         | 84                            | 61                                            | 82                                            | [71]      |
|                | Portugal      | 2009      | GS/2                    | 2                 | SPE-LC-MS/MS | 2/6                           | 100                           | 339                                           | 438                                           | [6]       |
|                | Portugal      | 2011      | TP/1                    | 7                 | SPE-LC-MS/MS | NA                            | 100                           | 294                                           | 347                                           | [7]       |
|                | Serbia        | NA        | GS/1                    | 2                 | SPE-LC-MS/MS | 0.55/1.82                     | 0                             | ND                                            | ND                                            | [72]      |
|                | Spain         | 2007/2009 | CS/3                    | 24                | SPE-LC-MS/MS | 1.2/NA                        | NA                            | 48                                            | NA                                            | [12]      |
|                | Spain         | 2008/2009 | TP/3                    | 42                | SPE-LC-MS/MS | NA/30                         | 55                            | 40                                            | 60                                            | [9]       |
|                | Spain         | 2009      | TP/3                    | 14                | SPE-LC-MS/MS | NA/50                         | 100                           | 140                                           | 160                                           | [9]       |
|                | USA           | 2013      | TP/2                    | 14                | SPE-LC-MS/MS | NA                            | 100                           | 71                                            | 114                                           | [10]      |
|                |               |           |                         |                   |              |                               | 67.8(100)                     | 101.2(339.0)                                  | 121.0(438.0)                                  |           |
| Zolpidem (ZOL) | EU            | 2010      | GS/90                   | 90                | SPE-LC-MS/MS | NA/0.5                        | 58                            | 1.5                                           | 42.6                                          | [68]      |
|                | Portugal      | 2009      | GS/2                    | 2                 | SPE-LC-MS/MS | 1/2                           | 0                             | ND                                            | ND                                            | [6]       |
|                | Sweden        | 2013      | FP/1                    | 7                 | SPE-LC-MS/MS | NA                            | 86                            | 5                                             | NA                                            | [13]      |
|                |               |           |                         |                   |              |                               | 48.0(86.0)                    | 2.2(5.0)                                      | 21.3(42.6)                                    |           |
| Total          |               |           |                         |                   |              |                               | 55.6(100)                     | 51.2(339.0)                                   | 66.9(438)                                     |           |

| Pharmaceutical     | Country        | Year      | Sampling Type/Locations | Number Of Samples | Method          | LOD/LOQ (ng L <sup>-1</sup> ) | Frequency (Highest Value) (%) | Average (Highest Value) (ng L <sup>-1</sup> ) | Maximum (Highest Value) (ng L <sup>-1</sup> ) | Reference |
|--------------------|----------------|-----------|-------------------------|-------------------|-----------------|-------------------------------|-------------------------------|-----------------------------------------------|-----------------------------------------------|-----------|
| Antibiotics        |                |           |                         |                   |                 |                               |                               |                                               |                                               |           |
| Azithromycin (AZI) | Croatia        | NA        | NA/5                    | 5                 | SPE-LC-MS/MS    | 3/10                          | 100                           | 96                                            | 210                                           | [14]      |
|                    | Czech Republic | 2011/2012 | TP/1                    | 136               | SPE-LC-MS/MS    | NA/7                          | 75                            | 50                                            | 220                                           | [15]      |
|                    | Greece         | 2011      | FP/1                    | 8                 | SPE-LC-MS/MS    | 19/58.5                       | 100                           | 171                                           | 245                                           | [16]      |
|                    | International  | NA        | NA                      | NA                | NA              | NA                            | NA                            | 160                                           | 7000                                          | [11]      |
|                    | Italy          | 2010      | CS/1                    | 4                 | SPE-LC-MS/MS    | NA                            | NA                            | 19                                            | NA                                            | [70]      |
|                    | Italy          | 2011      | TP/2                    | 6                 | SPE-LC-MS/MS    | NA/17                         | 100                           | 110                                           | 209                                           | [71]      |
|                    | Italy          | NA        | TP/1                    | 4                 | SPE-LC-MS/MS    | 4/NA                          | NA                            | 130                                           | NA                                            | [17]      |
|                    | Japan          | 2007/2009 | NA/9                    | 9                 | NA              | NA                            | NA                            | 520                                           | NA                                            | [18]      |
|                    | NA             | NA        | NA                      | 6                 | NA              | NA                            | 100                           | 138                                           | NA                                            | [19]      |
|                    | Portugal       | 2009      | GS/2                    | 2                 | SPE-LC-MS/MS    | 2/5                           | 100                           | 683                                           | 836                                           | [6]       |
|                    | Portugal       | 2011      | TP/1                    | 7                 | SPE-LC-MS/MS    | NA                            | 100                           | 171                                           | 297                                           | [7]       |
|                    | Portugal       | 2013/2014 | FP/2                    | 18                | SPE-UHPLC-MS/MS | 0.16/0.50                     | 66.7                          | NA                                            | 21.5                                          | [20]      |
|                    | Serbia         | NA        | GS/1                    | 2                 | SPE-LC-MS/MS    | 2.58/8.59                     | 50                            | 150                                           | 150                                           | [72]      |
|                    | Spain          | 2008/2009 | TP/5                    | 33                | SPE-LC-MS/MS    | 7.1/23.5                      | 22                            | 440                                           | 1986                                          | [73]      |
|                    | Spain          | 2011      | GS/3                    | 3                 | SPE-UPLC-MS/MS  | 4.6/15.5                      | 100                           | 393                                           | 592                                           | [21]      |
| USA                | 2010           | FP/1      | 6                       | SPE-LC-MS/MS      | 3.7/11          | NA                            | 110                           | 350                                           | [22]                                          |           |



| Pharmaceutical       | Country        | Year      | Sampling Type/Locations | Number Of Samples | Method          | LOD/LOQ (ng L <sup>-1</sup> ) | Frequency (Highest Value) (%) | Average (Highest Value) (ng L <sup>-1</sup> ) | Maximum (Highest Value) (ng L <sup>-1</sup> ) | Reference |
|----------------------|----------------|-----------|-------------------------|-------------------|-----------------|-------------------------------|-------------------------------|-----------------------------------------------|-----------------------------------------------|-----------|
| Clarithromycin (CLA) | USA            | 2014/2015 | GS/2                    | 6                 | SPE-UPLC-MS/MS  | NA                            | NA                            | 1465.2                                        | 5814.8                                        | [74]      |
|                      |                |           |                         |                   |                 |                               | 83.1(100)                     | 300.4(1465.2)                                 | 1379.3(7000.0)                                |           |
|                      | Czech Republic | 2011/2012 | TP/1                    | 136               | SPE-LC-MS/MS    | NA/3                          | 100                           | 930                                           | 2310                                          | [15]      |
|                      | Greece         | 2011      | FP/1                    | 8                 | SPE-LC-MS/MS    | 1.9/5.8                       | 100                           | 1153                                          | 1476                                          | [16]      |
|                      | International  | NA        | NA                      | NA                | NA              | NA                            | NA                            | 290                                           | 800                                           | [11]      |
|                      | Italy          | 2007/2008 | TP/4                    | 24                | SPE-LC-MS/MS    | NA                            | NA                            | 310                                           | NA                                            | [23]      |
|                      | Italy          | 2010      | CS/1                    | 4                 | SPE-LC-MS/MS    | NA                            | NA                            | 265                                           | NA                                            | [70]      |
|                      | Italy          | 2011      | TP/2                    | 6                 | SPE-LC-MS/MS    | NA/13                         | 100                           | 193                                           | 374                                           | [71]      |
|                      | Italy          | NA        | TP/1                    | 4                 | SPE-LC-MS/MS    | 2/NA                          | NA                            | 280                                           | NA                                            | [17]      |
|                      | Japan          | 2007/2009 | NA/9                    | 9                 | NA              | NA                            | NA                            | 593                                           | NA                                            | [18]      |
|                      | NA             | NA        | NA                      | 6                 | NA              | NA                            | 100                           | 359                                           | NA                                            | [19]      |
|                      | Portugal       | 2011      | TP/1                    | 7                 | SPE-LC-MS/MS    | NA                            | 100                           | 22.4                                          | 40.0                                          | [7]       |
|                      | Portugal       | 2013/2014 | FP/2                    | 18                | SPE-UHPLC-MS/MS | 0.08/0.22                     | 44.4                          | 18.11                                         | 70.4                                          | [20]      |
|                      | Spain          | 2007/2009 | CS/3                    | 24                | SPE-LC-MS/MS    | 1.2/NA                        | NA                            | 38                                            | NA                                            | [12]      |
|                      | Spain          | 2008/2009 | TP/5                    | 33                | SPE-LC-MS/MS    | 2.9/9.7                       | 25                            | 202                                           | 589                                           | [73]      |
| Spain                | 2009           | TP/3      | 14                      | SPE-LC-MS/MS      | NA/3            | 100                           | 20                            | 60                                            | [9]                                           |           |
| Spain                | 2011           | GS/3      | 3                       | SPE-UPLC-MS/MS    | 9.1/30.4        | 100                           | 198                           | 229                                           | [21]                                          |           |

| Pharmaceutical      | Country          | Year      | Sampling Type/Locations | Number Of Samples | Method          | LOD/LOQ (ng L <sup>-1</sup> ) | Frequency (Highest Value) (%) | Average (Highest Value) (ng L <sup>-1</sup> ) | Maximum (Highest Value) (ng L <sup>-1</sup> ) | Reference |
|---------------------|------------------|-----------|-------------------------|-------------------|-----------------|-------------------------------|-------------------------------|-----------------------------------------------|-----------------------------------------------|-----------|
| Ciprofloxacin (CIP) | Sweden           | 2013      | FP/1                    | 7                 | SPE-LC-MS/MS    | NA                            | 100                           | 35                                            | NA                                            | [13]      |
|                     | Taiwan           | NA        | GS/1                    | NA                | SPE-LC-MS/MS    | 0.5/NA                        | NA                            | 35.5                                          | NA                                            | [24]      |
|                     | USA              | 2010      | FP/1                    | 6                 | SPE-LC-MS/MS    | 3.2/9.6                       | NA                            | <LOQ                                          | 19                                            | [22]      |
|                     |                  |           |                         |                   |                 |                               | 86.9(100)                     | 274.6(1153.0)                                 | 596.7(2310.0)                                 |           |
|                     | Asia             | NA        | NA                      | NA                | NA              | NA                            | NA                            | NA                                            | 2050                                          | [75]      |
|                     | Belgium          | 2013      | TP/2                    | 10                | SPE-ESI-HRMS-LC | 31/102                        | 40                            | 106                                           | ND                                            | [1]       |
|                     | Czech Republic   | 2011/2012 | TP/1                    | 136               | SPE-LC-MS/MS    | NA/3                          | 91                            | 65                                            | 190                                           | [15]      |
|                     | EU               | 2010      | GS/90                   | 90                | SPE-LC-MS/MS    | NA/15                         | 90                            | 96.3                                          | 264                                           | [68]      |
|                     | Europe           | NA        | NA                      | NA                | NA              | NA                            | NA                            | NA                                            | 499                                           | [75]      |
|                     | France           | 2014/2015 | GS/6                    | 24                | SPE-UHPLC-MS/MS | 24.5/28.2                     | NA                            | NA                                            | NA                                            | [76]      |
|                     | Greece           | 2011      | FP/1                    | 8                 | SPE-LC-MS/MS    | 5.4/16.3                      | 100                           | 1116                                          | 1437                                          | [16]      |
|                     | Greece           | 2013/2014 | TP/1                    | 24                | SPE-LC-MS/MS    | 14.7/48.6                     | 41.7                          | 199                                           | 591                                           | [25]      |
|                     | India (industry) | 2008      | GS/1                    | NA                | SPE-LC-MS       | NA/10                         | NA                            | NA                                            | 14 000 000                                    | [77]      |
|                     | International    | NA        | NA                      | NA                | NA              | NA                            | NA                            | 860                                           | 9000                                          | [11]      |
|                     | Italy            | 2007/2008 | TP/4                    | 24                | SPE-LC-MS/MS    | NA                            | NA                            | 14.5                                          | NA                                            | [23]      |
| Italy               | 2010             | CS/1      | 4                       | SPE-LC-MS/MS      | NA              | NA                            | 208                           | NA                                            | [70]                                          |           |
| Italy               | 2011             | TP/2      | 6                       | SPE-LC-MS/MS      | NA/7            | 100                           | 155                           | 499                                           | [71]                                          |           |

| Pharmaceutical | Country  | Year      | Sampling Type/Locations | Number Of Samples | Method          | LOD/LOQ (ng L <sup>-1</sup> ) | Frequency (Highest Value) (%) | Average (Highest Value) (ng L <sup>-1</sup> ) | Maximum (Highest Value) (ng L <sup>-1</sup> ) | Reference |
|----------------|----------|-----------|-------------------------|-------------------|-----------------|-------------------------------|-------------------------------|-----------------------------------------------|-----------------------------------------------|-----------|
|                | Italy    | NA        | TP/1                    | 4                 | SPE-LC-MS/MS    | 2/NA                          | NA                            | 630                                           | NA                                            | [17]      |
|                | Kenya    | 2012/2013 | GS/3                    | 3                 | SPE-LC-MS       | NA/NA                         | 0                             | 0                                             | 0                                             | [26]      |
|                | Korea    | 2007      | GS/10                   | 10                | SPE-LC-MS/MS    | NA                            | 0                             | ND                                            | ND                                            | [27]      |
|                | Korea    | 2008      | GS/12                   | 30                | SPE-LC-MS/MS    | NA                            | 9                             | 728                                           | 2050                                          | [28]      |
|                | NA       | NA        | NA                      | 29                | NA              | NA                            | 91                            | 72                                            | 140                                           | [19]      |
|                | Portugal | 2007      | TP/1                    | 2                 | SPE-LC-FD       | 17/NA                         | 100                           | 156.2                                         | 100.8                                         | [29]      |
|                | Portugal | 2009      | GS/2                    | 2                 | SPE-LC-MS/MS    | 1/4                           | 0                             | ND                                            | ND                                            | [6]       |
|                | Portugal | 2011      | TP/1                    | 7                 | SPE-LC-MS/MS    | NA                            | 100                           | 369                                           | 1396                                          | [7]       |
|                | Portugal | 2013/2014 | FP/2                    | 18                | SPE-UHPLC-MS/MS | 20.2/61.2                     | 27.8                          | 73                                            | 179                                           | [20]      |
|                | Spain    | 2008/2009 | TP/5                    | 33                | SPE-LC-MS/MS    | 3.1/10.3                      | 94                            | 911                                           | 5692                                          | [73]      |
|                | Spain    | 2009      | TP/3                    | 14                | SPE-LC-MS/MS    | NA/50                         | 100                           | 700                                           | 1080                                          | [9]       |
|                | Spain    | 2011      | GS/3                    | 3                 | SPE-UPLC-MS/MS  | 5.6/18.5                      | 66                            | 101                                           | 147                                           | [21]      |
|                | Spain    | 2016/2017 | GS/3                    | 45                | SPE-LC-MS/MS    | NA/1.8                        | 93.3                          | 321                                           | 4719                                          | [78]      |
|                | Spain    | NA        | NA/1                    | 12                | SPE-LC-MS/MS    | NA                            | NA                            | 2378                                          | 5692                                          | [30]      |
|                | Sweden   | 2002/2003 | FP/5                    | 10                | SPE-LC-MS       | NA/6                          | 90                            | 20                                            | 60                                            | [31]      |
|                | Sweden   | 2013      | FP/1                    | 7                 | SPE-LC-MS/MS    | NA                            | 100                           | 61                                            | NA                                            | [13]      |

| Pharmaceutical     | Country        | Year      | Sampling Type/Locations | Number Of Samples | Method       | LOD/LOQ (ng L <sup>-1</sup> ) | Frequency (Highest Value) (%) | Average (Highest Value) (ng L <sup>-1</sup> ) | Maximum (Highest Value) (ng L <sup>-1</sup> ) | Reference |
|--------------------|----------------|-----------|-------------------------|-------------------|--------------|-------------------------------|-------------------------------|-----------------------------------------------|-----------------------------------------------|-----------|
|                    | Taiwan         | NA        | GS/1                    | NA                | SPE-LC-MS/MS | 0.5/NA                        | 0                             | ND                                            | ND                                            | [24]      |
|                    | USA            | 2010      | FP/1                    | 6                 | SPE-LC-MS/MS | 3.3/6.7                       | 0                             | ND                                            | ND                                            | [22]      |
|                    | USA            | 2011      | TP/50                   | 50                | SPE-LC-MS/MS | 10/NA                         | 61                            | 67                                            | 260                                           | [69]      |
|                    | USA            | NA        | CS/7                    | 10                | SPE-LC-MS    | NA/50                         | 40                            | 60                                            | 140                                           | [32]      |
|                    |                |           |                         |                   |              |                               | 59.8(100)                     | 326.4(2378.0)                                 | 501 292.4(14 000 000)                         |           |
| Erythromycin (ERY) | Croatia        | NA        | NA/5                    | 5                 | SPE-LC-MS/MS | 6/20                          | NA                            | ND                                            | ND                                            | [14]      |
|                    | Czech Republic | 2011/2012 | TP/1                    | 136               | SPE-LC-MS/MS | NA/6                          | 100                           | 77                                            | 300                                           | [15]      |
|                    | Greece         | 2011      | FP/1                    | 8                 | SPE-LC-MS/MS | 155/470                       | 0                             | ND                                            | ND                                            | [16]      |
|                    | Greece         | 2013/2014 | TP/1                    | 24                | SPE-LC-MS/MS | 24.3/80.2                     | 0                             | ND                                            | ND                                            | [25]      |
|                    | International  | NA        | NA                      | NA                | NA           | NA                            | NA                            | NA                                            | 2840                                          | [33]      |
|                    | International  | NA        | NA                      | NA                | NA           | NA                            | NA                            | 730                                           | 9000                                          | [11]      |
|                    | Italy          | 2007/2008 | TP/4                    | 24                | SPE-LC-MS/MS | NA                            | NA                            | 32.4                                          | NA                                            | [23]      |
|                    | Italy          | 2010      | CS/1                    | 4                 | SPE-LC-MS/MS | NA                            | 0                             | ND                                            | ND                                            | [70]      |
|                    | Italy          | NA        | TP/1                    | 4                 | SPE-LC-MS/MS | 8/NA                          | NA                            | 15                                            | NA                                            | [17]      |
|                    | Japan          | 2007/2009 | NA/9                    | 9                 | NA           | NA                            | NA                            | 208                                           | NA                                            | [18]      |
|                    | Korea          | 2004/2005 | GS/7                    | 7                 | SPE-LC-MS/MS | NA                            | 71                            | 130                                           | 294                                           | [79]      |
| Korea              | 2007           | GS/10     | 10                      | SPE-LC-MS/MS      | NA           | NA                            | NA                            | 300                                           | [27]                                          |           |

| Pharmaceutical | Country      | Year      | Sampling Type/Locations | Number Of Samples | Method         | LOD/LOQ (ng L <sup>-1</sup> ) | Frequency (Highest Value) (%) | Average (Highest Value) (ng L <sup>-1</sup> ) | Maximum (Highest Value) (ng L <sup>-1</sup> ) | Reference |
|----------------|--------------|-----------|-------------------------|-------------------|----------------|-------------------------------|-------------------------------|-----------------------------------------------|-----------------------------------------------|-----------|
|                | Korea        | 2008      | GS/12                   | 30                | SPE-LC-MS/MS   | NA                            | 3                             | 146                                           | 146                                           | [28]      |
|                | NA           | NA        | NA                      | 3                 | NA             | NA                            | 100                           | 212                                           | 290                                           | [19]      |
|                | Portugal     | 2011      | TP/1                    | 7                 | SPE-LC-MS/MS   | NA                            | 100                           | 71.2                                          | 134                                           | [7]       |
|                | Scotland     | 2005/2006 | GS/2                    | 40                | SPE-LC-MS/MS   | 0.1/0.5                       | 55                            | 381                                           | 2550                                          | [80]      |
|                | Serbia       | NA        | GS/1                    | 2                 | SPE-LC-MS/MS   | 1.65/5.48                     | 0                             | ND                                            | ND                                            | [72]      |
|                | South Africa | 2013      | GS/3                    | 3                 | SPE-LC-MS/MS   | 3/12                          | NA                            | 240                                           | NA                                            | [34]      |
|                | Spain        | 2008/2009 | TP/5                    | 33                | SPE-LC-MS/MS   | 29.7/98.9                     | 83                            | 679                                           | 6316                                          | [73]      |
|                | Spain        | 2009      | TP/3                    | 14                | SPE-LC-MS/MS   | NA/8                          | 100                           | 80                                            | 120                                           | [9]       |
|                | Spain        | NA        | NA/1                    | 12                | SPE-LC-MS/MS   | NA                            | NA                            | 331                                           | 760                                           | [30]      |
|                | Sweden       | 2002/2003 | FP/5                    | 10                | SPE-LC-MS      | NA/160                        | 0                             | ND                                            | ND                                            | [31]      |
|                | Taiwan       | NA        | GS/1                    | NA                | SPE-LC-MS/MS   | 0.1/NA                        | NA                            | 43.9                                          | NA                                            | [24]      |
|                | UK           | 2007      | GS/2                    | 20                | SPE-LC-MS/MS   | NA                            | 100                           | 1041                                          | 2841                                          | [35]      |
|                | UK           | NA        | GS/1                    | 3                 | SPE-LC-MS/MS   | 10/NA                         | 100                           | 163                                           | 180                                           | [81]      |
|                | UK           | NA        | NA                      | NA                | NA             | NA                            | NA                            | NA                                            | 1385                                          | [36]      |
|                | USA          | 2010      | TP/1                    | 6                 | SPE-LC-MS/MS   | 86.5/288.3                    | 0                             | ND                                            | ND                                            | [37]      |
|                | USA          | 2010      | FP/1                    | 6                 | SPE-LC-MS/MS   | 2.7/8.2                       | 100                           | 180                                           | 340                                           | [22]      |
|                | USA          | 2014/2015 | GS/2                    | 6                 | SPE-UPLC-MS/MS | NA                            | NA                            | 7.8                                           | 15.49                                         | [74]      |

| Pharmaceutical          | Country       | Year      | Sampling Type/Locations | Number Of Samples | Method          | LOD/LOQ (ng L <sup>-1</sup> ) | Frequency (Highest Value) (%) | Average (Highest Value) (ng L <sup>-1</sup> ) | Maximum (Highest Value) (ng L <sup>-1</sup> ) | Reference |
|-------------------------|---------------|-----------|-------------------------|-------------------|-----------------|-------------------------------|-------------------------------|-----------------------------------------------|-----------------------------------------------|-----------|
|                         | USA           | NA        | CS/7                    | 10                | SPE-LC-MS       | NA/50                         | 30                            | 270                                           | 300                                           | [32]      |
|                         |               |           |                         |                   |                 |                               | 52.3(100)                     | 186.6(1041.0)                                 | 1124.5(9000.0)                                |           |
| Total                   |               |           |                         |                   |                 |                               | 66.0(100)                     | 269.5(2378.0)                                 | 185 371.0(14 000 000)                         |           |
| <b>Lipid regulators</b> |               |           |                         |                   |                 |                               |                               |                                               |                                               |           |
| Bezafibrate (BEZ)       | Brazil        | 1997      | TP/1                    | 6                 | SPE-GC-MS       | NA                            | NA                            | 600                                           | 1100                                          | [38]      |
|                         | China         | 2009/2010 | GS/2                    | 24                | SPE-UPLC-MS/MS  | NA                            | 91                            | 16.1                                          | 51.4                                          | [39]      |
|                         | Croatia       | NA        | NA/5                    | 5                 | SPE-LC-MS/MS    | 2/6                           | NA                            | NA                                            | 10                                            | [14]      |
|                         | EU            | 2010      | GS/90                   | 90                | SPE-LC-MS/MS    | NA/1                          | 60                            | 25.4                                          | 343                                           | [68]      |
|                         | France        | 2014/2015 | GS/6                    | 24                | SPE-UHPLC-MS/MS | 31/38.4                       | NA                            | 25.05                                         | 57.6                                          | [76]      |
|                         | Greece        | 2010/2011 | TP/8                    | 32                | SPE-LC-MS/MS    | NA                            | 47                            | 39                                            | 344                                           | [40]      |
|                         | Greece        | 2013/2014 | TP/1                    | 24                | SPE-LC-MS/MS    | 5.3/17.4                      | 8.3                           | <LOD                                          | <LOD                                          | [25]      |
|                         | International | NA        | NA                      | NA                | NA              | NA                            | NA                            | NA                                            | 670                                           | [33]      |
|                         | International | NA        | NA                      | NA                | NA              | NA                            | NA                            | 900                                           | 8000                                          | [11]      |
|                         | Italy         | 2010      | CS/1                    | 4                 | SPE-LC-MS/MS    | NA                            | NA                            | 126                                           | NA                                            | [70]      |
|                         | Italy         | 2011      | TP/2                    | 6                 | SPE-LC-MS/MS    | NA/3                          | 17                            | 3                                             | 3                                             | [71]      |
|                         | Mexico        | 2015/2016 | TP/2                    | 8                 | SPE- LC-MS/MS   | 0.2/0.8                       | 100                           | 529                                           | 950                                           | [41]      |
|                         | NA            | NA        | NA                      | 21                | NA              | NA                            | 78                            | 816                                           | 4800                                          | [19]      |
| Portugal                | 2009          | GS/2      | 2                       | SPE-LC-MS/MS      | 5/17            | 100                           | 1070                          | 1797                                          | [6]                                           |           |

| Pharmaceutical    | Country  | Year      | Sampling Type/Locations | Number Of Samples | Method         | LOD/LOQ (ng L <sup>-1</sup> ) | Frequency (Highest Value) (%) | Average (Highest Value) (ng L <sup>-1</sup> ) | Maximum (Highest Value) (ng L <sup>-1</sup> ) | Reference |
|-------------------|----------|-----------|-------------------------|-------------------|----------------|-------------------------------|-------------------------------|-----------------------------------------------|-----------------------------------------------|-----------|
|                   | Portugal | 2011      | TP/1                    | 7                 | SPE-LC-MS/MS   | NA                            | 100                           | 409                                           | 635                                           | [7]       |
|                   | Spain    | 2007      | TP/1                    | 5                 | SPE-LC-MS/MS   | NA/3                          | 100                           | 97                                            | 130                                           | [82]      |
|                   | Spain    | 2007/2009 | CS/3                    | 24                | SPE-LC-MS/MS   | 0.1/NA                        | NA                            | 190                                           | NA                                            | [12]      |
|                   | Spain    | 2008/2009 | TP/5                    | 33                | SPE-LC-MS/MS   | 2.5/8.3                       | 99                            | 221                                           | 926                                           | [73]      |
|                   | Spain    | 2008/2009 | TP/3                    | 42                | SPE-LC-MS/MS   | NA/10                         | 100                           | 70                                            | 390                                           | [9]       |
|                   | Spain    | 2009      | TP/3                    | 14                | SPE-LC-MS/MS   | NA/10                         | 100                           | 60                                            | 80                                            | [9]       |
|                   | Spain    | 2012      | GS./3                   | 21                | SPE-UPLC-MS/MS | NA/1.0                        | 100                           | 17                                            | 39.9                                          | [42]      |
|                   | Spain    | 2016/2017 | GS/3                    | 45                | SPE-LC-MS/MS   | NA/1.8                        | 93.3                          | 58                                            | 132                                           | [78]      |
|                   | Spain    | NA        | NA/1                    | 12                | SPE-LC-MS/MS   | NA                            | NA                            | 128                                           | 280                                           | [30]      |
|                   | UK       | 2007      | GS/2                    | 20                | SPE-LC-MS/MS   | NA                            | 92                            | 231                                           | 667                                           | [35]      |
|                   | UK       | NA        | NA                      | NA                | NA             | NA                            | NA                            | NA                                            | 418                                           | [43]      |
|                   |          |           |                         |                   |                |                               | 80.4(100)                     | 255.9(1070.0)                                 | 948.9(8000.0)                                 |           |
| Gemfibrozil (GEM) | Brazil   | 1997      | TP/1                    | 6                 | SPE-GC-MS      | NA                            | NA                            | 200                                           | 1800                                          | [38]      |
|                   | Canada   | 2004      | TP/8                    | 8                 | SPE-GC-MS/MS   | 10/NA                         | 100                           | 190                                           | 2090                                          | [44]      |
|                   | Canada   | 2005      | GS/2                    | 4                 | SPE-GC-MS      | 0.3/NA                        | 100                           | 266.3                                         | 478.2                                         | [83]      |
|                   | China    | 2009/2010 | GS/2                    | 24                | SPE-UPLC-MS/MS | NA                            | 77                            | 34.3                                          | 326                                           | [39]      |
|                   | China    | 2012/2013 | GS/1                    | 4                 | SPE-LC-MS/MS   | 0.1/NA                        | NA                            | 20                                            | NA                                            | [45]      |

| Pharmaceutical | Country       | Year      | Sampling Type/Locations | Number Of Samples | Method        | LOD/LOQ (ng L <sup>-1</sup> ) | Frequency (Highest Value) (%) | Average (Highest Value) (ng L <sup>-1</sup> ) | Maximum (Highest Value) (ng L <sup>-1</sup> ) | Reference |
|----------------|---------------|-----------|-------------------------|-------------------|---------------|-------------------------------|-------------------------------|-----------------------------------------------|-----------------------------------------------|-----------|
|                | China         | 2014      | GS/3                    | 12                | SPE-LC-MS/MS  | 0.1/NA                        | 75                            | 1.0                                           | 2.1                                           | [46]      |
|                | Croatia       | NA        | NA/5                    | 5                 | SPE-LC-MS/MS  | 1/3                           | NA                            | 120                                           | 320                                           | [14]      |
|                | EU            | 2010      | GS/90                   | 90                | SPE-LC-MS/MS  | NA/1                          | 60                            | 138                                           | 3619                                          | [68]      |
|                | Greece        | 2010/2011 | TP/8                    | 32                | SPE-LC-MS/MS  | NA                            | 50                            | 21                                            | 356                                           | [40]      |
|                | Greece        | 2011      | FP/1                    | 8                 | SPE-LC-MS/MS  | 2.6/7.9                       | 88                            | 12.3                                          | 35                                            | [16]      |
|                | Greece        | 2013/2014 | TP/1                    | 24                | SPE-LC-MS/MS  | 35/105                        | 0                             | ND                                            | ND                                            | [25]      |
|                | International | NA        | NA                      | NA                | NA            | NA                            | NA                            | NA                                            | 5240                                          | [33]      |
|                | International | NA        | NA                      | NA                | NA            | NA                            | NA                            | 930                                           | 7000                                          | [11]      |
|                | Ireland       | 2011/2012 | TP/2                    | 12                | SPE-LC-MS/MS  | 35/NA                         | 83                            | 365                                           | 650                                           | [84]      |
|                | Italy         | 2010      | CS/1                    | 4                 | SPE-LC-MS/MS  | NA                            | NA                            | 84                                            | NA                                            | [70]      |
|                | Korea         | 2004/2005 | GS/7                    | 7                 | SPE-LC-MS/MS  | NA                            | 43                            | 11.2                                          | 17                                            | [79]      |
|                | Korea         | 2007      | GS/10                   | 10                | SPE-LC-MS/MS  | NA                            | 0                             | ND                                            | ND                                            | [27]      |
|                | Korea         | 2010      | NA/5                    | 5                 | SPE-LC-MS/MS  | NA                            | 100                           | 17                                            | 26                                            | [47]      |
|                | Mexico        | 2015/2016 | TP/2                    | 8                 | SPE- LC-MS/MS | 6.7/22                        | 100                           | 139                                           | 380                                           | [41]      |
|                | NA            | NA        | NA                      | 21                | NA            | NA                            | 70                            | 564                                           | 1340                                          | [19]      |
|                | NA            | NA        | NA                      | NA                | NA            | NA                            | NA                            | NA                                            | 1500                                          | [85]      |
|                | Portugal      | 2009      | GS/2                    | 2                 | SPE-LC-MS/MS  | 10/36                         | 100                           | 968                                           | 1183                                          | [6]       |
|                | Portugal      | 2011      | TP/1                    | 7                 | SPE-LC-MS/MS  | NA                            | NA                            | <LOQ                                          | <LOQ                                          | [7]       |



| Pharmaceutical    | Country | Year      | Sampling Type/Locations | Number Of Samples | Method          | LOD/LOQ (ng L <sup>-1</sup> ) | Frequency (Highest Value) (%) | Average (Highest Value) (ng L <sup>-1</sup> ) | Maximum (Highest Value) (ng L <sup>-1</sup> ) | Reference |
|-------------------|---------|-----------|-------------------------|-------------------|-----------------|-------------------------------|-------------------------------|-----------------------------------------------|-----------------------------------------------|-----------|
|                   | Spain   | 2007      | TP/1                    | 5                 | SPE-LC-MS/MS    | NA/4                          | 100                           | 2123                                          | 3090                                          | [82]      |
|                   | Spain   | 2007/2009 | CS/3                    | 24                | SPE-LC-MS/MS    | 0.3/NA                        | NA                            | 183                                           | NA                                            | [12]      |
|                   | Spain   | 2008/2009 | TP/5                    | 33                | SPE-LC-MS/MS    | 0.1/0.2                       | 98                            | 3903                                          | 36 364                                        | [73]      |
|                   | Spain   | 2008/2009 | TP/3                    | 42                | SPE-LC-MS/MS    | NA/20                         | 100                           | 540                                           | 1240                                          | [9]       |
|                   | Spain   | 2009      | TP/3                    | 14                | SPE-LC-MS/MS    | NA/4                          | 100                           | 490                                           | 910                                           | [9]       |
|                   | Spain   | 2012      | GS/3                    | 21                | SPE-UPLC-MS/MS  | NA/1.5                        | 100                           | 460                                           | 826.2                                         | [42]      |
|                   | Spain   | NA        | NA/1                    | 12                | SPE-LC-MS/MS    | NA                            | NA                            | 845                                           | 5233                                          | [30]      |
|                   | Sweden  | 2002      | FP/1                    | 1                 | SPE-GC/LC-MS/MS | NA                            | 100                           | 180                                           | 180                                           | [48]      |
|                   | USA     | 2010      | FP/1                    | 6                 | SPE-LC-MS/MS    | 1.6/4.8                       | 100                           | 170                                           | 1100                                          | [22]      |
|                   | USA     | 2011      | TP/50                   | 50                | SPE-LC-MS/MS    | 10/NA                         | 76                            | 420                                           | 2300                                          | [69]      |
|                   | USA     | 2014/2015 | GS/2                    | 6                 | SPE-UPLC-MS/MS  | NA                            | NA                            | 755.63                                        | 1584.03                                       | [74]      |
|                   |         |           |                         |                   |                 |                               | 74.8(100)                     | 442.2(3903.0)                                 | 2554.5(36 364)                                |           |
| Simvastatin (SIM) | Canada  | 2002      | NA/1                    | 3                 | SPE-LC-MS/MS    | 0.2/NA                        | NA                            | 1                                             | NA                                            | [49]      |
|                   | Greece  | 2010/2011 | TP/8                    | 32                | SPE-LC-MS/MS    | NA                            | 9                             | <LOQ                                          | <LOQ                                          | [40]      |
|                   | Greece  | 2011      | FP/1                    | 8                 | SPE-LC-MS/MS    | 28/84.2                       | 25                            | ND                                            | 39.1                                          | [16]      |
|                   | Greece  | 2013/2014 | TP/1                    | 24                | SPE-LC-MS/MS    | 9.7/32.1                      | 37.5                          | 205                                           | 1738                                          | [25]      |

| Pharmaceutical      | Country       | Year      | Sampling Type/Locations | Number Of Samples | Method              | LOD/LOQ (ng L <sup>-1</sup> ) | Frequency (Highest Value) (%) | Average (Highest Value) (ng L <sup>-1</sup> ) | Maximum (Highest Value) (ng L <sup>-1</sup> ) | Reference |  |
|---------------------|---------------|-----------|-------------------------|-------------------|---------------------|-------------------------------|-------------------------------|-----------------------------------------------|-----------------------------------------------|-----------|--|
|                     | International | NA        | NA                      | NA                | NA                  | NA                            | NA                            | 2                                             | 2                                             | [11]      |  |
|                     | Malaysia      | 2013      | GS/4                    | 12                | SPE-LC-MS/MS        | NA/4                          | 67                            | 12                                            | 22                                            | [50]      |  |
|                     | Portugal      | 2009      | GS/2                    | 2                 | SPE-LC-MS/MS        | 10/35                         | 100                           | 726                                           | 1255                                          | [6]       |  |
|                     | Spain         | 2008/2009 | TP/5                    | 33                | SPE-LC-MS/MS        | 1.8/6.1                       | 0                             | ND                                            | ND                                            | [73]      |  |
|                     | Spain         | 2009      | TP/3                    | 14                | SPE-LC-MS/MS        | NA/20                         | 0                             | ND                                            | ND                                            | [9]       |  |
|                     | UK            | 2007      | GS/2                    | 20                | SPE-LC-MS/MS        | NA                            | 38                            | 5                                             | 20                                            | [35]      |  |
|                     | UK            | NA        | NA                      | NA                | NA                  | NA                            | NA                            | NA                                            | 5                                             | [43]      |  |
|                     | USA           | 2011      | TP/50                   | 50                | SPE-LC-MS/MS        | 41/NA                         | 24                            | <LOQ                                          | <LOQ                                          | [69]      |  |
|                     |               |           |                         |                   |                     |                               | 33.4(100)                     | 86.5(726.0)                                   | 280.1(1738.0)                                 |           |  |
| Total               |               |           |                         |                   |                     |                               | 68.9(100)                     | 319.0(3903.0)                                 | 1601.5(36 364)                                |           |  |
| Antiepileptic       |               |           |                         |                   |                     |                               |                               |                                               |                                               |           |  |
| Carbamazepine (CAR) | America       | NA        | NA                      | NA                | NA                  | NA                            | NA                            | NA                                            | 1550                                          | [75]      |  |
|                     | Asia          | NA        | NA                      | NA                | NA                  | NA                            | NA                            | NA                                            | 21 000                                        | [75]      |  |
|                     | Belgium       | 2013      | TP/2                    | 10                | SPE-ESI-HRMS-LC     | 97/323                        | 100                           | 637                                           | ND                                            | [1]       |  |
|                     | Canada        | NA        | TP/1                    | NA                | SPE-LDTD-APCI-MS/MS | 54/108                        | NA                            | 274                                           | NA                                            | [51]      |  |
|                     | China         | 2009/2010 | GS/2                    | 24                | SPE-UPLC-MS/MS      | NA                            | 100                           | 88.2                                          | 277                                           | [39]      |  |
|                     | China         | 2011      | GS/3                    | 16                | SPE-LC-MS/MS        | NA/0.5                        | 100                           | NA                                            | 21.6                                          | [3]       |  |
|                     | China         | 2011      | GS/3                    | 3                 | SPE-LC-MS/MS        | NA                            | 100                           | 17.3                                          | 22                                            | [2]       |  |
|                     | China         | 2012/2013 | GS/1                    | 4                 | SPE-LC-MS/MS        | 0.1/NA                        | NA                            | 60                                            | NA                                            | [45]      |  |

| Pharmaceutical | Country        | Year      | Sampling Type/Locations | Number Of Samples | Method          | LOD/LOQ (ng L <sup>-1</sup> ) | Frequency (Highest Value) (%) | Average (Highest Value) (ng L <sup>-1</sup> ) | Maximum (Highest Value) (ng L <sup>-1</sup> ) | Reference |
|----------------|----------------|-----------|-------------------------|-------------------|-----------------|-------------------------------|-------------------------------|-----------------------------------------------|-----------------------------------------------|-----------|
|                | China          | 2014      | GS/3                    | 12                | SPE-LC-MS/MS    | 0.1/NA                        | 83                            | 6.4                                           | 19.5                                          | [46]      |
|                | China          | 2014      | TP/5                    | 5                 | SPE-LC-MS/MS    | NA/1.6                        | 100                           | 34.5                                          | 47.3                                          | [4]       |
|                | Croatia        | NA        | NA/5                    | 5                 | SPE-LC-MS/MS    | 10/40                         | NA                            | 410                                           | 630                                           | [14]      |
|                | Czech Republic | 2011/2012 | TP/1                    | 136               | SPE-LC-MS/MS    | NA/8                          | 100                           | 510                                           | 730                                           | [15]      |
|                | EU             | 2010      | GS/90                   | 90                | SPE-LC-MS/MS    | NA/1                          | 90                            | 832                                           | 4609                                          | [68]      |
|                | Europe         | NA        | NA                      | NA                | NA              | NA                            | NA                            | NA                                            | 150                                           | [75]      |
|                | France         | 2014/2015 | GS/6                    | 24                | SPE-UHPLC-MS/MS | 0.03/0.1                      | NA                            | 706.73                                        | 1007                                          | [76]      |
|                | Greece         | 2010/2011 | TP/8                    | 32                | SPE-LC-MS/MS    | NA                            | 94                            | 126                                           | 417                                           | [40]      |
|                | Greece         | 2011      | FP/1                    | 8                 | SPE-LC-MS/MS    | 21/64.2                       | 100                           | 461                                           | 501                                           | [16]      |
|                | Greece         | 2013/2014 | TP/1                    | 24                | SPE-LC-MS/MS    | 1.4/4.6                       | 91.7                          | 74.2                                          | 125                                           | [25]      |
|                | India          | 2013      | GS/2                    | 7                 | SPE-LC-MS/MS    | NA/NA                         | 100                           | 530                                           | 770                                           | [5]       |
|                | International  | NA        | NA                      | NA                | NA              | NA                            | NA                            | NA                                            | 4600                                          | [33]      |
|                | International  | NA        | NA                      | NA                | NA              | NA                            | NA                            | 1040                                          | 13 000                                        | [11]      |
|                | Ireland        | 2011/2012 | TP/2                    | 12                | SPE-LC-MS/MS    | 15/NA                         | 100                           | 1567                                          | 3160                                          | [84]      |
|                | Italy          | 2010      | CS/1                    | 4                 | SPE-LC-MS/MS    | NA                            | NA                            | 387                                           | NA                                            | [70]      |
|                | Italy          | 2011      | TP/2                    | 6                 | SPE-LC-MS/MS    | NA/10                         | 100                           | 183                                           | 265                                           | [71]      |
|                | Italy          | NA        | TP/1                    | 4                 | SPE-LC-MS/MS    | 5/NA                          | NA                            | 370                                           | NA                                            | [17]      |

| Pharmaceutical | Country      | Year      | Sampling Type/Locations | Number Of Samples | Method          | LOD/LOQ (ng L <sup>-1</sup> ) | Frequency (Highest Value) (%) | Average (Highest Value) (ng L <sup>-1</sup> ) | Maximum (Highest Value) (ng L <sup>-1</sup> ) | Reference |
|----------------|--------------|-----------|-------------------------|-------------------|-----------------|-------------------------------|-------------------------------|-----------------------------------------------|-----------------------------------------------|-----------|
|                | Japan        | 2001/2003 | TP/5                    | 12                | SPE-GC-MS       | NA                            | NA                            | NA                                            | 1200                                          | [52]      |
|                | Kenya        | 2012/2013 | GS/3                    | 3                 | SPE-LC-MS       | NA/NA                         | 33.3                          | 106.6                                         | 320                                           | [26]      |
|                | Korea        | 2004/2005 | GS/7                    | 7                 | SPE-LC-MS/MS    | NA                            | 86                            | 226                                           | 729                                           | [79]      |
|                | Korea        | 2007      | GS/10                   | 10                | SPE-LC-MS/MS    | NA                            | NA                            | NA                                            | 250                                           | [27]      |
|                | Korea        | 2008      | GS/12                   | 30                | SPE-LC-MS/MS    | NA                            | 100                           | 1750                                          | 21 000                                        | [28]      |
|                | Korea        | 2010      | NA/5                    | 5                 | SPE-LC-MS/MS    | NA                            | 100                           | 55                                            | 74                                            | [47]      |
|                | Malaysia     | 2013      | GS/4                    | 12                | SPE-LC-MS/MS    | NA/4                          | 83.3                          | 27                                            | 53                                            | [50]      |
|                | Mexico       | 2015/2016 | TP/2                    | 8                 | SPE- LC-MS/MS   | 0.7/2.3                       | 100                           | 284.5                                         | 476                                           | [41]      |
|                | NA           | NA        | NA                      | 63                | NA              | NA                            | 100                           | 674                                           | 2300                                          | [19]      |
|                | Portugal     | 2011      | TP/1                    | 7                 | SPE-LC-MS/MS    | NA                            | 100                           | 460                                           | 196                                           | [7]       |
|                | Portugal     | 2013/2014 | FP/2                    | 18                | SPE-UHPLC-MS/MS | 0.12/0.34                     | 100                           | 117                                           | 245                                           | [20]      |
|                | Portugal     | NA        | GS/5                    | 9                 | SPE-LC-MS       | 2/7                           | 10                            | NA                                            | 238                                           | [53]      |
|                | Serbia       | NA        | GS/1                    | 2                 | SPE-LC-MS/MS    | 0.27/0.9                      | 100                           | 14                                            | 15                                            | [72]      |
|                | South Africa | 2013      | GS/3                    | 3                 | SPE-LC-MS/MS    | 268/891                       | NA                            | 1460                                          | NA                                            | [34]      |
|                | Spain        | 2003/2004 | TP/1                    | 10                | SPE-LC-MS/MS    | 30/NA                         | 100                           | 130                                           | 230                                           | [54]      |
|                | Spain        | 2007/2009 | CS/3                    | 24                | SPE-LC-MS/MS    | 0.6/NA                        | NA                            | 472                                           | NA                                            | [12]      |

| Pharmaceutical                          | Country | Year      | Sampling Type/Locations | Number Of Samples | Method          | LOD/LOQ (ng L <sup>-1</sup> ) | Frequency (Highest Value) (%) | Average (Highest Value) (ng L <sup>-1</sup> ) | Maximum (Highest Value) (ng L <sup>-1</sup> ) | Reference |
|-----------------------------------------|---------|-----------|-------------------------|-------------------|-----------------|-------------------------------|-------------------------------|-----------------------------------------------|-----------------------------------------------|-----------|
|                                         | Spain   | 2008/2009 | TP/5                    | 33                | SPE-LC-MS/MS    | 0.5/1.2                       | 99                            | 176                                           | 1593                                          | [73]      |
|                                         | Spain   | 2016/2017 | GS/3                    | 45                | SPE-LC-MS/MS    | NA/1.8                        | 100                           | 64                                            | 390                                           | [78]      |
|                                         | Spain   | NA        | NA/1                    | 12                | SPE-LC-MS/MS    | NA                            | NA                            | 117                                           | 173                                           | [30]      |
|                                         | Sweden  | 2002      | FP/1                    | 1                 | SPE-GC/LC-MS/MS | NA                            | 100                           | 1180                                          | 1180                                          | [48]      |
|                                         | Sweden  | 2007/2008 | GS/1                    | 10                | SPE-LC-MS/MS    | NA                            | 100                           | 437                                           | NA                                            | [86]      |
|                                         | Sweden  | 2013      | FP/1                    | 7                 | SPE-LC-MS/MS    | NA                            | 100                           | 305                                           | NA                                            | [13]      |
|                                         | Taiwan  | NA        | GS/1                    | NA                | SPE-LC-MS/MS    | 0.1                           | NA                            | 0.9                                           | NA                                            | [24]      |
|                                         | UK      | 2007      | GS/2                    | 20                | SPE-LC-MS/MS    | NA                            | 100                           | 1663                                          | 4596                                          | [35]      |
|                                         | UK      | NA        | NA                      | NA                | NA              | NA                            | NA                            | NA                                            | 3117                                          | [43]      |
|                                         | USA     | 2010      | TP/1                    | 6                 | SPE-LC-MS/MS    | 2.2/7.3                       | NA                            | 7                                             | NA                                            | [37]      |
|                                         | USA     | 2010      | FP/1                    | 6                 | SPE-LC-MS/MS    | 2.7/8.2                       | 100                           | 180                                           | 340                                           | [22]      |
|                                         | USA     | 2011      | TP/50                   | 50                | SPE-LC-MS/MS    | 4.4/NA                        | 96                            | 97                                            | 240                                           | [69]      |
|                                         | USA     | 2012/2013 | GS/4                    | 28                | SPE-UPLC-MS/MS  | 0.03/NA                       | 71                            | 0.61                                          | 2.04                                          | [87]      |
|                                         | USA     | 2013      | TP/2                    | 14                | SPE-LC-MS/MS    | NA                            | 100                           | 289                                           | 731                                           | [10]      |
|                                         | USA     | 2014/2015 | GS/2                    | 6                 | SPE-UPLC-MS/MS  | NA                            | NA                            | 118.83                                        | 158.35                                        | [74]      |
|                                         |         |           |                         |                   |                 |                               | 92.7(100)                     | 398.4(1750.0)                                 | 2016.3(21 000)                                |           |
| Selective serotonin reuptake inhibitors |         |           |                         |                   |                 |                               |                               |                                               |                                               |           |

| Pharmaceutical      | Country          | Year      | Sampling Type/Locations | Number Of Samples | Method          | LOD/LOQ (ng L <sup>-1</sup> ) | Frequency (Highest Value) (%) | Average (Highest Value) (ng L <sup>-1</sup> ) | Maximum (Highest Value) (ng L <sup>-1</sup> ) | Reference |
|---------------------|------------------|-----------|-------------------------|-------------------|-----------------|-------------------------------|-------------------------------|-----------------------------------------------|-----------------------------------------------|-----------|
| (SSRIs)             |                  |           |                         |                   |                 |                               |                               |                                               |                                               |           |
| Citalopram (CIT)    | Canada           | 2007      | FP/1                    | 6                 | SPE-LC-MS/MS    | 0.077/NA                      | 100                           | 52.3                                          | 57.8                                          | [55]      |
|                     | China            | 2011      | GS/3                    | 19                | SPE-LC-MS/MS    | NA/0.2                        | 100                           | NA                                            | 5.0                                           | [3]       |
|                     | China            | 2011      | GS/3                    | 3                 | SPE-LC-MS/MS    | NA                            | 100                           | 11                                            | 5                                             | [2]       |
|                     | Czech Republic   | 2011/2012 | TP/1                    | 136               | SPE-LC-MS/MS    | NA/5                          | 100                           | 73                                            | 120                                           | [15]      |
|                     | EU               | 2010      | GS/90                   | 90                | SPE-LC-MS/MS    | NA/5                          | 83                            | 33.8                                          | 189                                           | [68]      |
|                     | India (industry) | 2008      | GS/1                    | NA                | SPE-LC-MS       | NA/10                         | NA                            | NA                                            | 430 000                                       | [77]      |
|                     | Norway           | 2005      | FP/3                    | 3                 | SPE-LC-MS/MS    | NA/0.16                       | 100                           | 151                                           | 382                                           | [56]      |
|                     | Norway           | 2007      | FP/2                    | 8                 | LPME-LC-MS/MS   | 0.017/0.057                   | 100                           | 75                                            | 238.4                                         | [57]      |
|                     | Portugal         | 2011      | TP/1                    | 7                 | SPE-LC-MS/MS    | NA                            | 100                           | 34.0                                          | 49.1                                          | [7]       |
|                     | Portugal         | 2013/2014 | FP/2                    | 18                | SPE-UHPLC-MS/MS | 0.70/2.12                     | 44.4                          | 25.05                                         | 67.4                                          | [20]      |
|                     | Spain            | 2008/2009 | TP/5                    | 33                | SPE-LC-MS/MS    | 1.3/4.4                       | 23                            | 108                                           | 228                                           | [73]      |
|                     | Sweden           | 2013      | FP/1                    | 7                 | SPE-LC-MS/MS    | NA                            | 100                           | 268                                           | NA                                            | [13]      |
|                     | USA              | 2013      | TP/2                    | 14                | SPE-LC-MS/MS    | NA                            | 100                           | 215                                           | 414                                           | [10]      |
|                     |                  |           |                         |                   |                 |                               | 87.5(100)                     | 95.1(268.0)                                   | 35 979.6(430 000)                             |           |
| Desmethylcitalopram | Norway           | 2007      | FP/2                    | 8                 | LPME-LC-MS/MS   | 0.229/0.762                   | 100                           | 114                                           | 300.5                                         | [57]      |

| Pharmaceutical   | Country       | Year      | Sampling Type/Locations | Number Of Samples | Method          | LOD/LOQ (ng L <sup>-1</sup> ) | Frequency (Highest Value) (%) | Average (Highest Value) (ng L <sup>-1</sup> ) | Maximum (Highest Value) (ng L <sup>-1</sup> ) | Reference |
|------------------|---------------|-----------|-------------------------|-------------------|-----------------|-------------------------------|-------------------------------|-----------------------------------------------|-----------------------------------------------|-----------|
| (N-CIT)          | USA           | 2013      | TP/2                    | 14                | SPE-LC-MS/MS    | NA                            | 93                            | 99                                            | 310                                           | [10]      |
|                  |               |           |                         |                   |                 |                               | 96.5(100)                     | 106.5(114.0)                                  | 305.3(310.0)                                  |           |
| Fluoxetine (FLU) | Belgium       | 2013      | TP/2                    | 10                | SPE-ESI-HRMS-LC | 11/37                         | 0                             | ND                                            | ND                                            | [1]       |
|                  | Canada        | 2007      | FP/1                    | 6                 | SPE-LC-MS/MS    | 0.050/NA                      | 100                           | 2.9                                           | 3.7                                           | [55]      |
|                  | China         | 2011      | GS/3                    | 19                | SPE-LC-MS/MS    | NA/10                         | 100                           | <LOQ                                          | <LOQ                                          | [3]       |
|                  | China         | 2011      | GS/3                    | 3                 | SPE-LC-MS/MS    | NA                            | 0                             | ND                                            | ND                                            | [2]       |
|                  | China         | 2012/2013 | GS/1                    | 4                 | SPE-LC-MS/MS    | 0.1/NA                        | 0                             | ND                                            | ND                                            | [45]      |
|                  | China         | 2014      | TP/5                    | 5                 | SPE-LC-MS/MS    | NA/0.2                        | 100                           | 1.4                                           | 2.2                                           | [4]       |
|                  | China         | 2014      | GS/3                    | 12                | SPE-LC-MS/MS    | 0.1/NA                        | 0                             | ND                                            | ND                                            | [46]      |
|                  | Croatia       | NA        | NA/5                    | 5                 | SPE-LC-MS/MS    | 20/70                         | NA                            | ND                                            | ND                                            | [14]      |
|                  | England       | NA        | GS/7                    | 81                | SPE-LC-MS/MS    | NA                            | 57                            | 16.2                                          | 44.9                                          | [43]      |
|                  | EU            | 2010      | GS/90                   | 90                | SPE-LC-MS/MS    | NA/5                          | 2                             | 2.1                                           | 21.5                                          | [68]      |
|                  | International | NA        | NA                      | NA                | NA              | NA                            | NA                            | 240                                           | 12 000                                        | [11]      |
|                  | Italy         | 2010      | CS/1                    | 4                 | SPE-LC-MS/MS    | NA                            | NA                            | 44                                            | NA                                            | [70]      |
|                  | Korea         | 2004/2005 | GS/7                    | 7                 | SPE-LC-MS/MS    | NA                            | 14                            | 1.7                                           | 1.7                                           | [79]      |
|                  | NA            | NA        | NA                      | NA                | NA              | NA                            | NA                            | NA                                            | 841                                           | [85]      |
|                  | Norway        | 2005      | FP/3                    | 3                 | SPE-LC-MS/MS    | NA/0.12                       | 67                            | 1.3                                           | 1.3                                           | [56]      |

| Pharmaceutical          | Country       | Year      | Sampling Type/Locations | Number Of Samples | Method          | LOD/LOQ (ng L <sup>-1</sup> ) | Frequency (Highest Value) (%) | Average (Highest Value) (ng L <sup>-1</sup> ) | Maximum (Highest Value) (ng L <sup>-1</sup> ) | Reference |
|-------------------------|---------------|-----------|-------------------------|-------------------|-----------------|-------------------------------|-------------------------------|-----------------------------------------------|-----------------------------------------------|-----------|
|                         | Norway        | 2007      | FP/2                    | 8                 | LPME-LC-MS/MS   | 0.150/0.490                   | 100                           | 3.6                                           | 8.4                                           | [57]      |
|                         | Portugal      | 2009      | GS/2                    | 2                 | SPE-LC-MS/MS    | 1/4                           | 0                             | ND                                            | ND                                            | [6]       |
|                         | Portugal      | 2011      | TP/1                    | 7                 | SPE-LC-MS/MS    | NA                            | NA                            | <LOQ                                          | <LOQ                                          | [7]       |
|                         | Portugal      | 2013/2014 | FP/2                    | 18                | SPE-UHPLC-MS/MS | 0.04/0.12                     | 100                           | 14.8                                          | 34                                            | [20]      |
|                         | Portugal      | NA        | GS/5                    | 9                 | SPE-LC-MS       | 15/57                         | 0                             | ND                                            | ND                                            | [53]      |
|                         | Spain         | 2008/2009 | TP/5                    | 33                | SPE-LC-MS/MS    | 0.9/2.9                       | 48                            | 178                                           | 1972                                          | [73]      |
|                         | Spain         | NA        | NA/1                    | 12                | SPE-LC-MS/MS    | NA                            | NA                            | 223                                           | 929                                           | [30]      |
|                         | Sweden        | 2013      | FP/1                    | 7                 | SPE-LC-MS/MS    | NA                            | 43                            | 9                                             | NA                                            | [13]      |
|                         | UK            | NA        | NA                      | NA                | NA              | NA                            | NA                            | NA                                            | 29                                            | [36]      |
|                         | USA           | 2010      | FP/1                    | 6                 | SPE-LC-MS/MS    | 3.5/10.5                      | NA                            | 28                                            | 96                                            | [22]      |
|                         | USA           | 2011      | TP/50                   | 50                | SPE-LC-MS/MS    | 2.8/NA                        | 38                            | 8.7                                           | 31                                            | [69]      |
|                         | USA           | 2014/2015 | GS/2                    | 6                 | SPE-UPLC-MS/MS  | NA                            | NA                            | 399.89                                        | 1187.40                                       | [74]      |
|                         |               |           |                         |                   |                 |                               | 42.7(100)                     | 47.0(399.9)                                   | 688.1(12 000)                                 |           |
| Norfluoxetine (Nor-FLU) | Canada        | 2007      | FP/1                    | 6                 | SPE-LC-MS/MS    | 0.087/NA                      | 100                           | 1.8                                           | 1.8                                           | [55]      |
|                         | England       | NA        | GS/7                    | 81                | SPE-LC-MS/MS    | NA                            | 36                            | 5.8                                           | 20.2                                          | [43]      |
|                         | International | NA        | NA                      | NA                | NA              | NA                            | NA                            | 10                                            | 10                                            | [11]      |
|                         | Norway        | 2007      | FP/2                    | 8                 | LPME-LC-MS/MS   | 0.1600.540                    | 75                            | 1.9                                           | 46.2                                          | [57]      |



| Pharmaceutical   | Country       | Year      | Sampling Type/Locations | Number Of Samples | Method          | LOD/LOQ (ng L <sup>-1</sup> ) | Frequency (Highest Value) (%) | Average (Highest Value) (ng L <sup>-1</sup> ) | Maximum (Highest Value) (ng L <sup>-1</sup> ) | Reference |
|------------------|---------------|-----------|-------------------------|-------------------|-----------------|-------------------------------|-------------------------------|-----------------------------------------------|-----------------------------------------------|-----------|
|                  | Portugal      | 2011      | TP/1                    | 7                 | SPE-LC-MS/MS    | NA                            | NA                            | 36.1                                          | 99.6                                          | [7]       |
|                  | Portugal      | 2013/2014 | FP/2                    | 18                | SPE-UHPLC-MS/MS | 0.34/1.04                     | 0                             | 0                                             | 0                                             | [20]      |
|                  | UK            | NA        | NA                      | NA                | NA              | NA                            | NA                            | NA                                            | 13                                            | [36]      |
|                  | USA           | 2011      | TP/50                   | 50                | SPE-LC-MS/MS    | 7.2/NA                        | 17                            | 7.7                                           | 15                                            | [69]      |
|                  |               |           |                         |                   |                 |                               | 45.6(100)                     | 9.0(36.1)                                     | 25.7(99.6)                                    |           |
| Paroxetine (PAR) | Belgium       | 2013      | TP/2                    | 10                | SPE-ESI-HRMS-LC | 74/248                        | 0                             | ND                                            | ND                                            | [1]       |
|                  | Canada        | 2007      | FP/1                    | 6                 | SPE-LC-MS/MS    | 0.096/NA                      | 100                           | 4.8                                           | 5.2                                           | [55]      |
|                  | China         | 2011      | GS/3                    | 19                | SPE-LC-MS/MS    | NA/80                         | 88                            | <LOQ                                          | <LOQ                                          | [3]       |
|                  | China         | 2011      | GS/3                    | 3                 | SPE-LC-MS/MS    | NA                            | 0                             | ND                                            | ND                                            | [2]       |
|                  | Croatia       | NA        | NA/5                    | 5                 | SPE-LC-MS/MS    | 7/26                          | NA                            | ND                                            | ND                                            | [14]      |
|                  | EU            | 2010      | GS/90                   | 90                | SPE-LC-MS/MS    | NA                            | 0                             | ND                                            | ND                                            | [68]      |
|                  | International | NA        | NA                      | NA                | NA              | NA                            | NA                            | 7                                             | 7                                             | [11]      |
|                  | Italy         | 2010      | CS/1                    | 4                 | SPE-LC-MS/MS    | NA                            | 0                             | ND                                            | ND                                            | [70]      |
|                  | Norway        | 2005      | FP/3                    | 3                 | SPE-LC-MS/MS    | NA/0.12                       | 100                           | 0.9                                           | 1.6                                           | [56]      |
|                  | Norway        | 2007      | FP/2                    | 8                 | LPME-LC-MS/MS   | 0.053/0.205                   | 100                           | 4.8                                           | 11.7                                          | [57]      |
|                  | Portugal      | 2009      | GS/2                    | 2                 | SPE-LC-MS/MS    | 1/3                           | 100                           | 150                                           | 240                                           | [6]       |
| Portugal         | 2011          | TP/1      | 7                       | SPE-LC-MS/MS      | NA              | 0                             | ND                            | ND                                            | [7]                                           |           |

| Pharmaceutical   | Country        | Year      | Sampling Type/Locations | Number Of Samples | Method          | LOD/LOQ (ng L <sup>-1</sup> ) | Frequency (Highest Value) (%) | Average (Highest Value) (ng L <sup>-1</sup> ) | Maximum (Highest Value) (ng L <sup>-1</sup> ) | Reference |
|------------------|----------------|-----------|-------------------------|-------------------|-----------------|-------------------------------|-------------------------------|-----------------------------------------------|-----------------------------------------------|-----------|
|                  | Portugal       | 2013/2014 | FP/2                    | 18                | SPE-UHPLC-MS/MS | 9.26/28.0                     | 5.55                          | 13.25                                         | 26.5                                          | [20]      |
|                  | Portugal       | NA        | GS/5                    | 9                 | SPE-LC-MS       | 27/89                         | 33                            | NA                                            | 3367                                          | [53]      |
|                  | Spain          | 2008/2009 | TP/5                    | 33                | SPE-LC-MS/MS    | 4.3/14.5                      | 2                             | 206                                           | 381                                           | [73]      |
|                  | Spain          | 2008/2009 | TP/3                    | 42                | SPE-LC-MS/MS    | NA/40                         | 0                             | ND                                            | ND                                            | [9]       |
|                  | Spain          | 2009      | TP/3                    | 14                | SPE-LC-MS/MS    | NA/170                        | 0                             | ND                                            | ND                                            | [9]       |
|                  | USA            | 2011      | TP/50                   | 50                | SPE-LC-MS/MS    | 9.1/NA                        | 0                             | ND                                            | ND                                            | [69]      |
|                  | USA            | 2014/2015 | GS/2                    | 6                 | SPE-UPLC-MS/MS  | NA                            | NA                            | 3.42                                          | 5.24                                          | [74]      |
|                  |                |           |                         |                   |                 |                               | 33.0(100)                     | 21.7(206.0)                                   | 212.9(3367.0)                                 |           |
| Sertraline (SER) | Canada         | 2007      | FP/1                    | 6                 | SPE-LC-MS/MS    | 0.048/NA                      | 100                           | 5.5                                           | 5.8                                           | [55]      |
|                  | China          | 2011      | GS/3                    | 19                | SPE-LC-MS/MS    | NA/12                         | 100                           | <LOQ                                          | <LOQ                                          | [3]       |
|                  | China          | 2011      | GS/3                    | 3                 | SPE-LC-MS/MS    | NA                            | 0                             | ND                                            | ND                                            | [2]       |
|                  | Czech Republic | 2011/2012 | TP/1                    | 136               | SPE-LC-MS/MS    | NA/3                          | 37                            | 3                                             | 6                                             | [15]      |
|                  | EU             | 2010      | GS/90                   | 90                | SPE-LC-MS/MS    | NA/10                         | 12                            | 2.1                                           | 37.5                                          | [68]      |
|                  | Greece         | 2013/2014 | TP/1                    | 24                | SPE-LC-MS/MS    | 1/3.3                         | 45.8                          | <LOD                                          | <LOD                                          | [25]      |
|                  | India          | 2013      | GS/2                    | 7                 | SPE-LC-MS/MS    | NA/NA                         | 78.5                          | 8.85                                          | 21                                            | [5]       |
|                  | Norway         | 2005      | FP/3                    | 3                 | SPE-LC-MS/MS    | NA/0.29                       | 100                           | 4.5                                           | 2.0                                           | [56]      |

| Pharmaceutical                | Country  | Year      | Sampling Type/Locations | Number Of Samples | Method          | LOD/LOQ (ng L <sup>-1</sup> ) | Frequency (Highest Value) (%) | Average (Highest Value) (ng L <sup>-1</sup> ) | Maximum (Highest Value) (ng L <sup>-1</sup> ) | Reference |
|-------------------------------|----------|-----------|-------------------------|-------------------|-----------------|-------------------------------|-------------------------------|-----------------------------------------------|-----------------------------------------------|-----------|
|                               | Norway   | 2007      | FP/2                    | 8                 | LPME-LC-MS/MS   | 0.160/0.520                   | 100                           | 8.7                                           | 14.6                                          | [57]      |
|                               | Portugal | 2011      | TP/1                    | 7                 | SPE-LC-MS/MS    | NA                            | 0                             | ND                                            | ND                                            | [7]       |
|                               | Portugal | 2013/2014 | FP/2                    | 18                | SPE-UHPLC-MS/MS | 0.04/0.14                     | 55.6                          | NA                                            | NA                                            | [20]      |
|                               | Sweden   | 2013      | FP/1                    | 7                 | SPE-LC-MS/MS    | NA                            | 100                           | 28                                            | NA                                            | [13]      |
|                               | USA      | 2011      | TP/50                   | 50                | SPE-LC-MS/MS    | 5/NA                          | 64                            | 21                                            | 71                                            | [69]      |
|                               | USA      | 2013      | TP/2                    | 14                | SPE-LC-MS/MS    | NA                            | 100                           | 44                                            | 73                                            | [10]      |
|                               |          |           |                         |                   |                 |                               | 63.8(100)                     | 9.7(44.0)                                     | 19.2(73.0)                                    |           |
| Desmethylsertraline (Nor-SER) | Canada   | 2007      | FP/1                    | 6                 | SPE-LC-MS/MS    | 0.072/NA                      | 100                           | 4.2                                           | 4.7                                           | [55]      |
|                               | Norway   | 2007      | FP/2                    | 8                 | LPME-LC-MS/MS   | 0.618/4.1                     | 63                            | 8.8                                           | 10.6                                          | [57]      |
|                               | USA      | 2011      | TP/50                   | 50                | SPE-LC-MS/MS    | 9.4/NA                        | 18                            | 9.9                                           | 24                                            | [69]      |
|                               | USA      | 2013      | TP/2                    | 14                | SPE-LC-MS/MS    | NA                            | 93                            | 64                                            | 83.6                                          | [10]      |
|                               |          |           |                         |                   |                 |                               | 68.5(100)                     | 21.7(64.0)                                    | 30.7(83.6)                                    |           |
| <b>Total</b>                  |          |           |                         |                   |                 |                               | 55.4(100)                     | 38.7(399.9)                                   | 5538.7(430 000)                               |           |
| <i>Anti-inflammatories</i>    |          |           |                         |                   |                 |                               |                               |                                               |                                               |           |
| Diclofenac (DIC)              | America  | NA        | NA                      | NA                | NA              | NA                            | NA                            | NA                                            | 4200                                          | [75]      |
|                               | Asia     | NA        | NA                      | NA                | NA              | NA                            | NA                            | NA                                            | 1760                                          | [75]      |
|                               | Belgium  | 2013      | TP/2                    | 10                | SPE-ESI-HRMS-LC | 17/57                         | 100                           | 1051                                          | ND                                            | [1]       |
|                               | Brazil   | 1997      | TP/1                    | 6                 | SPE-GC-MS       | NA                            | NA                            | 200                                           | 1500                                          | [38]      |

| Pharmaceutical | Country       | Year      | Sampling Type/Locations | Number Of Samples | Method              | LOD/LOQ (ng L <sup>-1</sup> ) | Frequency (Highest Value) (%) | Average (Highest Value) (ng L <sup>-1</sup> ) | Maximum (Highest Value) (ng L <sup>-1</sup> ) | Reference |
|----------------|---------------|-----------|-------------------------|-------------------|---------------------|-------------------------------|-------------------------------|-----------------------------------------------|-----------------------------------------------|-----------|
|                | Canada        | 2004      | TP/8                    | 8                 | SPE-GC-MS/MS        | 10/NA                         | 100                           | 110                                           | 250                                           | [44]      |
|                | Canada        | 2005      | GS/2                    | 4                 | SPE-GC-MS           | 1.0/NA                        | 100                           | 244.8                                         | 32                                            | [83]      |
|                | Canada        | NA        | TP/1                    | NA                | SPE-LDTD-APCI-MS/MS | 70/196                        | NA                            | 200                                           | NA                                            | [51]      |
|                | China         | 2009/2010 | GS/2                    | 24                | SPE-UPLC-MS/MS      | NA                            | 100                           | 185                                           | 463                                           | [39]      |
|                | China         | 2012/2013 | GS/1                    | 4                 | SPE-LC-MS/MS        | 0.1/NA                        | NA                            | 80                                            | NA                                            | [45]      |
|                | China         | 2014      | GS/3                    | 12                | SPE-LC-MS/MS        | 0.1/NA                        | 100                           | 40                                            | 69.2                                          | [46]      |
|                | Croatia       | NA        | NA/5                    | 5                 | SPE-LC-MS/MS        | 10/30                         | NA                            | 215                                           | 390                                           | [14]      |
|                | EU            | 2010      | GS/90                   | 90                | SPE-LC-MS/MS        | NA/1                          | 89                            | 49.5                                          | 174                                           | [68]      |
|                | Europe        | NA        | NA                      | NA                | NA                  | NA                            | NA                            | NA                                            | 740                                           | [75]      |
|                | France        | 2014/2015 | GS/6                    | 24                | SPE-UHPLC-MS/MS     | 130/171                       | NA                            | 1241                                          | 2476.3                                        | [76]      |
|                | Greece        | 1998/1999 | NA/4                    | 11                | SPE-GC-MS           | 1/2                           | 0                             | ND                                            | ND                                            | [58]      |
|                | Greece        | 2009      | FP/2                    | 18                | SPE-GC-MS           | NA                            | NA                            | 605                                           | 1070                                          | [59]      |
|                | Greece        | 2010/2011 | TP/8                    | 32                | SPE-LC-MS/MS        | NA                            | 72                            | 97                                            | 383                                           | [40]      |
|                | Greece        | 2011      | FP/1                    | 8                 | SPE-LC-MS/MS        | 21/63.6                       | 100                           | 874                                           | 987                                           | [16]      |
|                | Greece        | 2013/2014 | TP/1                    | 24                | SPE-LC-MS/MS        | 16.7/50.1                     | 87.5                          | 961                                           | 266.8                                         | [25]      |
|                | International | NA        | NA                      | NA                | NA                  | NA                            | NA                            | NA                                            | 690                                           | [33]      |

| Pharmaceutical | Country    | Year      | Sampling Type/Locations | Number Of Samples | Method          | LOD/LOQ (ng L <sup>-1</sup> ) | Frequency (Highest Value) (%) | Average (Highest Value) (ng L <sup>-1</sup> ) | Maximum (Highest Value) (ng L <sup>-1</sup> ) | Reference |
|----------------|------------|-----------|-------------------------|-------------------|-----------------|-------------------------------|-------------------------------|-----------------------------------------------|-----------------------------------------------|-----------|
|                | Ireland    | 2011/2012 | TP/2                    | 12                | SPE-LC-MS/MS    | 225/NA                        | 100                           | 880                                           | 1690                                          | [84]      |
|                | Italy      | 2010      | CS/1                    | 4                 | SPE-LC-MS/MS    | NA                            | NA                            | 271                                           | NA                                            | [70]      |
|                | Italy      | 2011      | TP/2                    | 6                 | SPE-LC-MS/MS    | NA/13                         | 100                           | 502                                           | 800                                           | [71]      |
|                | Kenya      | 2012/2013 | GS/3                    | 3                 | SPE-LC-MS       | NA/NA                         | 100                           | 40.3                                          | 61                                            | [26]      |
|                | Korea      | 2004/2005 | GS/7                    | 7                 | SPE-LC-MS/MS    | NA                            | 100                           | 40                                            | 127                                           | [79]      |
|                | Korea      | 2007      | GS/10                   | 10                | SPE-LC-MS/MS    | NA                            | 0                             | ND                                            | ND                                            | [27]      |
|                | Korea      | 2008      | GS/12                   | 30                | SPE-LC-MS/MS    | NA                            | 65                            | 191                                           | 1760                                          | [28]      |
|                | Korea      | 2010      | NA/5                    | 5                 | SPE-LC-MS/MS    | NA                            | 100                           | 24                                            | 49                                            | [47]      |
|                | Luxembourg | 2007/2008 | TP/1                    | 24                | SPE-LC-MS/MS    | 0.3/1.0                       | NA                            | NA                                            | 78                                            | [60]      |
|                | Malaysia   | 2013      | GS/4                    | 12                | SPE-LC-MS/MS    | NA/46                         | 0                             | ND                                            | ND                                            | [50]      |
|                | Mexico     | 2015/2016 | TP/2                    | 8                 | SPE- LC-MS/MS   | 1.5/4.9                       | 100                           | 1311.5                                        | 2180                                          | [41]      |
|                | NA         | NA        | NA                      | 101               | NA              | NA                            | 85                            | 680                                           | 1950                                          | [19]      |
|                | NA         | NA        | NA                      | NA                | NA              | NA                            | NA                            | NA                                            | 33 900                                        | [85]      |
|                | Portugal   | 2009      | GS/2                    | 2                 | SPE-LC-MS/MS    | 17/79                         | 100                           | 1268                                          | 1429                                          | [6]       |
|                | Portugal   | 2011      | TP/1                    | 7                 | SPE-LC-MS/MS    | NA                            | 100                           | 42.9                                          | 83.1                                          | [7]       |
|                | Portugal   | 2013/2014 | FP/2                    | 18                | SPE-UHPLC-MS/MS | 1.40/4.20                     | 38.9                          | 236                                           | 724                                           | [20]      |

| Pharmaceutical | Country               | Year      | Sampling Type/Locations | Number Of Samples | Method          | LOD/LOQ (ng L <sup>-1</sup> ) | Frequency (Highest Value) (%) | Average (Highest Value) (ng L <sup>-1</sup> ) | Maximum (Highest Value) (ng L <sup>-1</sup> ) | Reference |
|----------------|-----------------------|-----------|-------------------------|-------------------|-----------------|-------------------------------|-------------------------------|-----------------------------------------------|-----------------------------------------------|-----------|
|                | Portugal              | NA        | GS/5                    | 9                 | SPE-LC-MS       | 7/24                          | 22                            | NA                                            | 1612                                          | [53]      |
|                | Scotland              | 2005/2006 | GS/2                    | 40                | SPE-LC-MS/MS    | 0.2/0.5                       | 100                           | 34                                            | 203                                           | [80]      |
|                | Serbia                | NA        | GS/1                    | 2                 | SPE-LC-MS/MS    | 0.15/0.49                     | 0                             | ND                                            | ND                                            | [72]      |
|                | Spain                 | 2003/2004 | TP/1                    | 10                | SPE-LC-MS/MS    | 100/NA                        | NA                            | 900                                           | 2200                                          | [54]      |
|                | Spain                 | 2007      | TP/1                    | 5                 | SPE-LC-MS/MS    | NA/4                          | 100                           | 1293                                          | 1440                                          | [82]      |
|                | Spain                 | 2007/2009 | CS/3                    | 24                | SPE-LC-MS/MS    | 1.2/NA                        | NA                            | 526                                           | NA                                            | [12]      |
|                | Spain                 | 2008/2009 | TP/5                    | 33                | SPE-LC-MS/MS    | 0.4/1.2                       | 21                            | 3968                                          | 25 552                                        | [73]      |
|                | Spain                 | 2008/2009 | TP/3                    | 42                | SPE-LC-MS/MS    | NA/50                         | 100                           | 330                                           | 740                                           | [9]       |
|                | Spain                 | 2009      | TP/3                    | 14                | SPE-LC-MS/MS    | NA/50                         | 100                           | 340                                           | 620                                           | [9]       |
|                | Spain                 | 2012      | GS/3                    | 21                | SPE-UPLC-MS/MS  | NA/4.0                        | 100                           | 233                                           | 293.7                                         | [42]      |
|                | Spain                 | 2016/2017 | GS/3                    | 45                | SPE-LC-MS/MS    | NA/1.8                        | 86.6                          | 701                                           | 1932                                          | [78]      |
|                | Spain                 | NA        | NA/1                    | 12                | SPE-LC-MS/MS    | NA                            | NA                            | 220                                           | 431                                           | [30]      |
|                | Spain/Belgium/Germany | NA        | TP/NA                   | 25                | SPE-GC/LC-MS/MS | 7/20                          | NA                            | NA                                            | 1420                                          | [62]      |
|                | Sweden                | 2002      | FP/1                    | 1                 | SPE-GC/LC-MS/MS | NA                            | 100                           | 120                                           | 120                                           | [48]      |
|                | Sweden                | 2013      | FP/1                    | 7                 | SPE-LC-MS/MS    | NA                            | 100                           | 536                                           | NA                                            | [13]      |

| Pharmaceutical  | Country     | Year      | Sampling Type/Locations | Number Of Samples | Method          | LOD/LOQ (ng L <sup>-1</sup> ) | Frequency (Highest Value) (%) | Average (Highest Value) (ng L <sup>-1</sup> ) | Maximum (Highest Value) (ng L <sup>-1</sup> ) | Reference |
|-----------------|-------------|-----------|-------------------------|-------------------|-----------------|-------------------------------|-------------------------------|-----------------------------------------------|-----------------------------------------------|-----------|
|                 | Switzerland | 2003/2004 | FP/5                    | 44                | SPE-GC-MS       | 6/20                          | 100                           | 1350                                          | 1900                                          | [63]      |
|                 | Taiwan      | NA        | GS/1                    | NA                | SPE-LC-MS/MS    | 1                             | NA                            | 12.6                                          | NA                                            | [24]      |
|                 | UK          | 2007      | GS/2                    | 20                | SPE-LC-MS/MS    | NA                            | 100                           | 139                                           | 496                                           | [35]      |
|                 | UK          | NA        | GS/1                    | 3                 | SPE-LC-MS/MS    | 20/NA                         | 100                           | 407                                           | 460                                           | [81]      |
|                 | UK          | NA        | NA                      | NA                | NA              | NA                            | NA                            | NA                                            | 599                                           | [36]      |
|                 |             |           |                         |                   |                 |                               | 80.2(100)                     | 484.0(3968.0)                                 | 2006.0(33 900)                                |           |
| Ibuprofen (IBU) | America     | NA        | NA                      | NA                | NA              | NA                            | NA                            | NA                                            | 11 900                                        | [75]      |
|                 | Asia        | NA        | NA                      | NA                | NA              | NA                            | NA                            | NA                                            | 1600                                          | [75]      |
|                 | Belgium     | 2013      | TP/2                    | 10                | SPE-ESI-HRMS-LC | 140/466                       | 0                             | ND                                            | ND                                            | [1]       |
|                 | Brazil      | 1997      | TP/1                    | 6                 | SPE-GC-MS       | NA                            | NA                            | 100                                           | 3700                                          | [38]      |
|                 | Canada      | 2004      | TP/8                    | 8                 | SPE-GC-MS/MS    | 10/NA                         | 100                           | 310                                           | 2170                                          | [44]      |
|                 | Canada      | 2005      | GS/2                    | 4                 | SPE-GC-MS       | 0.8/NA                        | 100                           | 4766                                          | 67 118                                        | [83]      |
|                 | Canada      | 2010      | GS/9                    | 9                 | SPE-GC-MS/MS    | 7/NA                          | NA                            | NA                                            | 5200                                          | [88]      |
|                 | China       | 2012/2013 | GS/1                    | 4                 | SPE-LC-MS/MS    | 0.1/NA                        | NA                            | 180                                           | NA                                            | [45]      |
|                 | China       | 2014      | GS/3                    | 12                | SPE-LC-MS/MS    | 0.1/NA                        | 92                            | 50                                            | 99.4                                          | [46]      |
|                 | Croatia     | NA        | NA/5                    | 5                 | SPE-LC-MS/MS    | 12/20                         | 100                           | 266                                           | 800                                           | [14]      |
|                 | EU          | 2010      | GS/90                   | 90                | SPE-LC-MS/MS    | NA/2                          | 57                            | 80.5                                          | 2129                                          | [68]      |
|                 | Europe      | NA        | NA                      | NA                | NA              | NA                            | NA                            | NA                                            | 8000                                          | [75]      |

| Pharmaceutical | Country       | Year      | Sampling Type/Locations | Number Of Samples | Method          | LOD/LOQ (ng L <sup>-1</sup> ) | Frequency (Highest Value) (%) | Average (Highest Value) (ng L <sup>-1</sup> ) | Maximum (Highest Value) (ng L <sup>-1</sup> ) | Reference |
|----------------|---------------|-----------|-------------------------|-------------------|-----------------|-------------------------------|-------------------------------|-----------------------------------------------|-----------------------------------------------|-----------|
|                | France        | 2014/2015 | GS/6                    | 24                | SPE-UHPLC-MS/MS | 4.8/9.8                       | NA                            | 163.2                                         | 526.7                                         | [76]      |
|                | Greece        | 1998/1999 | NA/4                    | 11                | SPE-GC-MS       | 0.6/1.6                       | 100                           | ND                                            | 365                                           | [58]      |
|                | Greece        | 2009      | FP/2                    | 18                | SPE-GC-MS       | NA                            | 0                             | ND                                            | ND                                            | [59]      |
|                | Greece        | 2010/2011 | TP/8                    | 32                | SPE-LC-MS/MS    | NA                            | 25                            | <LOQ                                          | 301                                           | [40]      |
|                | Greece        | 2011      | FP/1                    | 8                 | SPE-LC-MS/MS    | 16/47                         | 0                             | ND                                            | ND                                            | [16]      |
|                | India         | 2013      | GS/2                    | 7                 | SPE-LC-MS/MS    | NA/NA                         | 100                           | 805                                           | 1940                                          | [5]       |
|                | International | NA        | NA                      | NA                | NA              | NA                            | NA                            | NA                                            | 55 000                                        | [33]      |
|                | Italy         | 2010      | CS/1                    | 4                 | SPE-LC-MS/MS    | NA                            | NA                            | 58                                            | NA                                            | [70]      |
|                | Japan         | 2001/2003 | TP/5                    | 12                | SPE-GC-MS       | NA                            | NA                            | NA                                            | 200                                           | [52]      |
|                | Kenya         | 2012/2013 | GS/3                    | 3                 | SPE-LC-MS       | NA/NA                         | 66.6                          | 1326.6                                        | 2070                                          | [26]      |
|                | Korea         | 2004/2005 | GS/7                    | 7                 | SPE-LC-MS/MS    | NA                            | 71                            | 65                                            | 137                                           | [79]      |
|                | Korea         | 2007      | GS/10                   | 10                | SPE-LC-MS/MS    | NA                            | NA                            | NA                                            | 40                                            | [27]      |
|                | Korea         | 2008      | GS/12                   | 30                | SPE-LC-MS/MS    | NA                            | 0                             | ND                                            | ND                                            | [28]      |
|                | Korea         | 2010      | NA/5                    | 5                 | SPE-LC-MS/MS    | NA                            | 100                           | 40                                            | 75                                            | [47]      |
|                | Luxembourg    | 2007/2008 | TP/1                    | 24                | SPE-LC-MS/MS    | 0.3/1.0                       | 100                           | NA                                            | 359                                           | [60]      |
|                | Mexico        | 2015/2016 | TP/2                    | 8                 | SPE-LC-MS/MS    | 2.3/7.6                       | 0                             | 0                                             | 0                                             | [41]      |



| Pharmaceutical | Country      | Year      | Sampling Type/Locations | Number Of Samples | Method          | LOD/LOQ (ng L <sup>-1</sup> ) | Frequency (Highest Value) (%) | Average (Highest Value) (ng L <sup>-1</sup> ) | Maximum (Highest Value) (ng L <sup>-1</sup> ) | Reference |
|----------------|--------------|-----------|-------------------------|-------------------|-----------------|-------------------------------|-------------------------------|-----------------------------------------------|-----------------------------------------------|-----------|
|                | NA           | NA        | NA                      | 109               | NA              | NA                            | 93                            | 1960                                          | 24 600                                        | [19]      |
|                | NA           | NA        | NA                      | NA                | NA              | NA                            | NA                            | NA                                            | 850                                           | [85]      |
|                | Portugal     | 2009      | GS/2                    | 2                 | SPE-LC-MS/MS    | 62/208                        | 100                           | 1308                                          | 1527                                          | [6]       |
|                | Portugal     | 2011      | TP/1                    | 7                 | SPE-LC-MS/MS    | NA                            | NA                            | 119                                           | 369                                           | [7]       |
|                | Portugal     | 2013/2014 | FP/2                    | 18                | SPE-UHPLC-MS/MS | 27.8/92.7                     | 100                           | 1406                                          | 3304                                          | [20]      |
|                | Portugal     | NA        | GS/5                    | 9                 | SPE-LC-MS       | 14/46                         | 89                            | NA                                            | 43 653                                        | [53]      |
|                | Scotland     | 2005/2006 | GS/2                    | 40                | SPE-LC-MS/MS    | 1.1/3.7                       | 98                            | 278                                           | 2206                                          | [80]      |
|                | Serbia       | NA        | GS/1                    | 2                 | SPE-LC-MS/MS    | 3.28/10.93                    | 0                             | ND                                            | ND                                            | [72]      |
|                | South Africa | 2013      | GS/3                    | 3                 | SPE-LC-MS/MS    | 244/813                       | NA                            | 12 940                                        | NA                                            | [34]      |
|                | Spain        | 2003/2004 | TP/1                    | 10                | SPE-LC-MS/MS    | 23/NA                         | 100                           | 7100                                          | 28 000                                        | [54]      |
|                | Spain        | 2007      | TP/1                    | 5                 | SPE-LC-MS/MS    | NA/13                         | 100                           | 180                                           | 340                                           | [82]      |
|                | Spain        | 2008/2009 | TP/5                    | 33                | SPE-LC-MS/MS    | 1.1/3.7                       | 13                            | 618                                           | 2351                                          | [73]      |
|                | Spain        | 2008/2009 | TP/3                    | 42                | SPE-LC-MS/MS    | NA/250                        | 33                            | <LOQ                                          | <LOQ                                          | [9]       |
|                | Spain        | 2009      | TP/3                    | 14                | SPE-LC-MS/MS    | NA/150                        | 0                             | ND                                            | ND                                            | [9]       |
|                | Spain        | 2011/2012 | NA/1                    | 5                 | SPE-LC-MS/MS    | 2.1/6.9                       | 100                           | 1112                                          | 1900                                          | [64]      |
|                | Spain        | 2012      | GS/3                    | 21                | SPE-UPLC-MS/MS  | NA/20                         | 0                             | ND                                            | ND                                            | [42]      |

| Pharmaceutical | Country               | Year      | Sampling Type/Locations | Number Of Samples | Method          | LOD/LOQ (ng L <sup>-1</sup> ) | Frequency (Highest Value) (%) | Average (Highest Value) (ng L <sup>-1</sup> ) | Maximum (Highest Value) (ng L <sup>-1</sup> ) | Reference |
|----------------|-----------------------|-----------|-------------------------|-------------------|-----------------|-------------------------------|-------------------------------|-----------------------------------------------|-----------------------------------------------|-----------|
|                | Spain                 | NA        | NA/1                    | 12                | SPE-LC-MS/MS    | NA                            | NA                            | 135                                           | 653                                           | [30]      |
|                | Spain/Belgium/Germany | NA        | TP/NA                   | 14                | SPE-GC/LC-MS/MS | 12/42                         | NA                            | NA                                            | 6900                                          | [62]      |
|                | Spain/Belgium/Germany | NA        | TP/NA                   | 14                | SPE-GC/LC-MS/MS | 26/75                         | NA                            | NA                                            | 455                                           | [62]      |
|                | Sweden                | 2002      | FP/1                    | 1                 | SPE-GC/LC-MS/MS | NA                            | 100                           | 150                                           | 150                                           | [48]      |
|                | Sweden                | 2013      | FP/1                    | 7                 | SPE-LC-MS/MS    | NA                            | 0                             | ND                                            | ND                                            | [13]      |
|                | Switzerland           | 2003/2004 | FP/4                    | 44                | SPE-GC-MS       | 8/30                          | 100                           | 1350                                          | 2500                                          | [63]      |
|                | Taiwan                | NA        | GS/1                    | NA                | SPE-LC-MS/MS    | 5                             | NA                            | 228                                           | NA                                            | [24]      |
|                | UK                    | 2007      | GS/2                    | 20                | SPE-LC-MS/MS    | NA                            | 100                           | 203                                           | 491                                           | [35]      |
|                | UK                    | NA        | GS/1                    | 3                 | SPE-LC-MS/MS    | 50/NA                         | 100                           | 2433                                          | 3800                                          | [81]      |
|                | UK                    | NA        | NA                      | NA                | NA              | NA                            | NA                            | NA                                            | 4239                                          | [36]      |
|                | USA                   | 2010      | FP/1                    | 6                 | SPE-LC-MS/MS    | 4.7/14                        | 0                             | ND                                            | ND                                            | [22]      |
|                | USA                   | 2011      | TP/50                   | 50                | SPE-LC-MS/MS    | 12/NA                         | 46                            | 460                                           | 4200                                          | [69]      |
|                | USA                   | 2012/2013 | GS/4                    | 28                | SPE-UPLC-MS/MS  | 0.085/NA                      | 68                            | 927                                           | 10 600                                        | [87]      |
|                | USA                   | 2014/2015 | GS/2                    | 6                 | SPE-UPLC-MS/MS  | NA                            | NA                            | 286.06                                        | 536.72                                        | [74]      |
|                |                       |           |                         |                   |                 |                               | 61.9(100)                     | 920.1(12 940)                                 | 5691.8(67 118)                                |           |
| Naproxen       | America               | NA        | NA                      | NA                | NA              | NA                            | NA                            | NA                                            | 1550                                          | [75]      |

| Pharmaceutical | Country       | Year      | Sampling Type/Locations | Number Of Samples | Method          | LOD/LOQ (ng L <sup>-1</sup> ) | Frequency (Highest Value) (%) | Average (Highest Value) (ng L <sup>-1</sup> ) | Maximum (Highest Value) (ng L <sup>-1</sup> ) | Reference |
|----------------|---------------|-----------|-------------------------|-------------------|-----------------|-------------------------------|-------------------------------|-----------------------------------------------|-----------------------------------------------|-----------|
| (NAP)          | Belgium       | 2013      | TP/2                    | 10                | SPE-ESI-HRMS-LC | 345/1149                      | 0                             | ND                                            | ND                                            | [1]       |
|                | Brazil        | 1997      | TP/1                    | 6                 | SPE-GC-MS       | NA                            | NA                            | 100                                           | 3000                                          | [38]      |
|                | Canada        | 2004      | TP/8                    | 8                 | SPE-GC-MS/MS    | 10/NA                         | 100                           | 820                                           | 2540                                          | [44]      |
|                | Canada        | 2005      | GS/2                    | 4                 | SPE-GC-MS       | 0.5/NA                        | 100                           | 4184                                          | 7962                                          | [83]      |
|                | Canada        | 2010      | GS/9                    | 9                 | SPE-GC-MS/MS    | 41/NA                         | NA                            | NA                                            | 3200                                          | [88]      |
|                | China         | 2012/2013 | GS/1                    | 4                 | SPE-LC-MS/MS    | 0.1/NA                        | NA                            | 5                                             | NA                                            | [45]      |
|                | China         | 2014      | GS/3                    | 12                | SPE-LC-MS/MS    | 0.1/NA                        | 42                            | 4.5                                           | 13.8                                          | [46]      |
|                | Croatia       | NA        | NA/5                    | 5                 | SPE-LC-MS/MS    | 9/32                          | NA                            | 108                                           | 160                                           | [14]      |
|                | EU            | 2010      | GS/90                   | 90                | SPE-LC-MS/MS    | NA/5                          | 66                            | 26.7                                          | 958                                           | [68]      |
|                | France        | 2014/2015 | GS/6                    | 24                | SPE-UHPLC-MS/MS | 12.7/19.2                     | NA                            | 177.5                                         | 355.3                                         | [76]      |
|                | Greece        | 2009      | FP/2                    | 18                | SPE-GC-MS       | NA                            | NA                            | 45                                            | 110                                           | [59]      |
|                | Greece        | 2010/2011 | TP/8                    | 32                | SPE-LC-MS/MS    | NA                            | 50                            | 158                                           | 1076                                          | [40]      |
|                | Greece        | 2011      | FP/1                    | 8                 | SPE-LC-MS/MS    | 16/47                         | 100                           | 142                                           | 176                                           | [16]      |
|                | Greece        | 2013/2014 | TP/1                    | 24                | SPE-LC-MS/MS    | 18.1/54.3                     | 0                             | ND                                            | ND                                            | [25]      |
|                | International | NA        | NA                      | NA                | NA              | NA                            | NA                            | NA                                            | 5090                                          | [33]      |
|                | Italy         | 2010      | CS/1                    | 4                 | SPE-LC-MS/MS    | NA                            | NA                            | 114                                           | NA                                            | [70]      |

| Pharmaceutical | Country  | Year      | Sampling Type/Locations | Number Of Samples | Method          | LOD/LOQ (ng L <sup>-1</sup> ) | Frequency (Highest Value) (%) | Average (Highest Value) (ng L <sup>-1</sup> ) | Maximum (Highest Value) (ng L <sup>-1</sup> ) | Reference |
|----------------|----------|-----------|-------------------------|-------------------|-----------------|-------------------------------|-------------------------------|-----------------------------------------------|-----------------------------------------------|-----------|
|                | Italy    | 2011      | TP/2                    | 6                 | SPE-LC-MS/MS    | NA/13                         | 17                            | 21                                            | 21                                            | [71]      |
|                | Japan    | 2001/2003 | TP/5                    | 12                | SPE-GC-MS       | NA                            | NA                            | NA                                            | 200                                           | [52]      |
|                | Korea    | 2004/2005 | GS/7                    | 7                 | SPE-LC-MS/MS    | NA                            | 100                           | 128                                           | 483                                           | [79]      |
|                | Korea    | 2007      | GS/10                   | 10                | SPE-LC-MS/MS    | NA                            | NA                            | NA                                            | 250                                           | [27]      |
|                | Korea    | 2008      | GS/12                   | 30                | SPE-LC-MS/MS    | NA                            | 26                            | 250                                           | 740                                           | [28]      |
|                | Korea    | 2010      | NA/5                    | 5                 | SPE-LC-MS/MS    | NA                            | 100                           | 111                                           | 166                                           | [47]      |
|                | Mexico   | 2015/2016 | TP/2                    | 8                 | SPE-LC-MS/MS    | 1.2/4.2                       | 100                           | 168.5                                         | 392                                           | [41]      |
|                | NA       | NA        | NA                      | 53                | NA              | NA                            | 87                            | 1890                                          | 33900                                         | [19]      |
|                | NA       | NA        | NA                      | NA                | NA              | NA                            | NA                            | NA                                            | 520                                           | [85]      |
|                | Portugal | 2009      | GS/2                    | 2                 | SPE-LC-MS/MS    | 14/49                         | 100                           | 1575                                          | 2748                                          | [6]       |
|                | Portugal | 2011      | TP/1                    | 7                 | SPE-LC-MS/MS    | NA                            | NA                            | 303                                           | 774                                           | [7]       |
|                | Portugal | 2013/2014 | FP/2                    | 18                | SPE-UHPLC-MS/MS | 0.10/0.30                     | 55.55                         | 44                                            | 270                                           | [20]      |
|                | Portugal | NA        | GS/5                    | 9                 | SPE-LC-MS       | 18/59                         | 0                             | ND                                            | ND                                            | [53]      |
|                | Spain    | 2007      | TP/1                    | 5                 | SPE-LC-MS/MS    | NA/18                         | 100                           | 717                                           | 1150                                          | [82]      |
|                | Spain    | 2007/2009 | CS/3                    | 24                | SPE-LC-MS/MS    | 0.9/NA                        | NA                            | 562                                           | NA                                            | [12]      |
|                | Spain    | 2008/2009 | TP/5                    | 33                | SPE-LC-MS/MS    | 7.2/24.1                      | 65                            | 1636                                          | 32241                                         | [73]      |

| Pharmaceutical     | Country               | Year      | Sampling Type/Locations | Number Of Samples | Method          | LOD/LOQ (ng L <sup>-1</sup> ) | Frequency (Highest Value) (%) | Average (Highest Value) (ng L <sup>-1</sup> ) | Maximum (Highest Value) (ng L <sup>-1</sup> ) | Reference |
|--------------------|-----------------------|-----------|-------------------------|-------------------|-----------------|-------------------------------|-------------------------------|-----------------------------------------------|-----------------------------------------------|-----------|
|                    | Spain                 | 2008/2009 | TP/3                    | 42                | SPE-LC-MS/MS    | NA/30                         | 100                           | 170                                           | 720                                           | [9]       |
|                    | Spain                 | 2009      | TP/3                    | 14                | SPE-LC-MS/MS    | NA/20                         | 100                           | 130                                           | 280                                           | [9]       |
|                    | Spain                 | 2012      | GS/3                    | 21                | SPE-UPLC-MS/MS  | NA/2                          | 100                           | 102                                           | 306.6                                         | [42]      |
|                    | Spain                 | NA        | NA/1                    | 12                | SPE-LC-MS/MS    | NA                            | NA                            | 923                                           | 2208                                          | [30]      |
|                    | Spain/Belgium/Germany | NA        | TP/NA                   | 14                | SPE-GC/LC-MS/MS | 26/75                         | NA                            | NA                                            | 625                                           | [62]      |
|                    | Sweden                | 2002      | FP/1                    | 1                 | SPE-GC/LC-MS/MS | NA                            | 100                           | 250                                           | 250                                           | [48]      |
|                    | Sweden                | 2013      | FP/1                    | 7                 | SPE-LC-MS/MS    | NA                            | NA                            | 785                                           | NA                                            | [13]      |
|                    | Taiwan                | NA        | GS/1                    | NA                | SPE-LC-MS/MS    | 5                             | NA                            | 15.7                                          | NA                                            | [24]      |
|                    | UK                    | 2007      | GS/2                    | 20                | SPE-LC-MS/MS    | NA                            | 96                            | 270                                           | 703                                           | [35]      |
|                    | UK                    | NA        | NA                      | NA                | NA              | NA                            | NA                            | NA                                            | 370                                           | [36]      |
|                    | USA                   | 2010      | FP/1                    | 6                 | SPE-LC-MS/MS    | 1.0/2.9                       | 100                           | 140                                           | 580                                           | [22]      |
|                    | USA                   | 2014/2015 | GS/2                    | 6                 | SPE-UPLC-MS/MS  | NA                            | NA                            | 166.08                                        | 346.18                                        | [74]      |
|                    |                       |           |                         |                   |                 |                               | 72.2(100)                     | 439.0(4184.0)                                 | 2660.9(33 900)                                |           |
| Paracetamol (PARA) | Belgium               | 2013      | TP/2                    | 10                | SPE-ESI-HRMS-LC | 60/200                        | 0                             | ND                                            | ND                                            | [1]       |
|                    | China                 | 2012/2013 | GS/1                    | 4                 | SPE-LC-MS/MS    | 0.1/NA                        | NA                            | 10                                            | NA                                            | [45]      |
|                    | China                 | 2014      | GS/3                    | 12                | SPE-LC-MS/MS    | 0.1/NA                        | 8.3                           | 0.9                                           | 11.1                                          | [46]      |

| Pharmaceutical | Country       | Year      | Sampling Type/Locations | Number Of Samples | Method          | LOD/LOQ (ng L <sup>-1</sup> ) | Frequency (Highest Value) (%) | Average (Highest Value) (ng L <sup>-1</sup> ) | Maximum (Highest Value) (ng L <sup>-1</sup> ) | Reference |
|----------------|---------------|-----------|-------------------------|-------------------|-----------------|-------------------------------|-------------------------------|-----------------------------------------------|-----------------------------------------------|-----------|
|                | Croatia       | NA        | NA/5                    | 5                 | SPE-LC-MS/MS    | 10/58                         | NA                            | 2102                                          | 5990                                          | [14]      |
|                | France        | 2014/2015 | GS/6                    | 24                | SPE-UHPLC-MS/MS | 75.9/130.3                    | NA                            | NA                                            | NA                                            | [76]      |
|                | Greece        | 2010/2011 | TP/8                    | 32                | SPE-LC-MS/MS    | NA                            | 78                            | 154                                           | 1060                                          | [40]      |
|                | Greece        | 2011      | FP/1                    | 8                 | SPE-LC-MS/MS    | 23/64.2                       | 100                           | 1926                                          | 7420                                          | [16]      |
|                | Greece        | 2013/2014 | TP/1                    | 24                | SPE-LC-MS/MS    | 10.1/33.3                     | 8.3                           | <LOD                                          | 305                                           | [25]      |
|                | International | NA        | NA                      | NA                | NA              | NA                            | NA                            | NA                                            | 30                                            | [33]      |
|                | Italy         | 2010      | CS/1                    | 4                 | SPE-LC-MS/MS    | NA                            | NA                            | 16                                            | NA                                            | [70]      |
|                | Kenya         | 2012/2013 | GS/3                    | 3                 | SPE-LC-MS       | NA/NA                         | 33.3                          | 33.3                                          | 100                                           | [26]      |
|                | Korea         | 2004/2005 | GS/7                    | 7                 | SPE-LC-MS/MS    | NA                            | 43                            | 9.5                                           | 19                                            | [79]      |
|                | Korea         | 2007      | GS/10                   | 10                | SPE-LC-MS/MS    | NA                            | 0                             | ND                                            | ND                                            | [27]      |
|                | Korea         | 2008      | GS/12                   | 30                | SPE-LC-MS/MS    | NA                            | 3                             | 652                                           | 652                                           | [28]      |
|                | Korea         | 2010      | NA/5                    | 5                 | SPE-LC-MS/MS    | NA                            | NA                            | 10                                            | 27                                            | [47]      |
|                | NA            | NA        | NA                      | 5                 | NA              | NA                            | 0                             | ND                                            | ND                                            | [19]      |
|                | Portugal      | 2009      | GS/2                    | 2                 | SPE-LC-MS/MS    | 6/22                          | 0                             | ND                                            | ND                                            | [6]       |
|                | Portugal      | 2011      | TP/1                    | 7                 | SPE-LC-MS/MS    | NA                            | 100                           | 96.1                                          | 106                                           | [7]       |
|                | Scotland      | 2005/2006 | GS/2                    | 40                | SPE-LC-MS/MS    | 10.9/36.7                     | 75                            | 762                                           | 22782                                         | [80]      |

| Pharmaceutical  | Country      | Year      | Sampling Type/Locations | Number Of Samples | Method         | LOD/LOQ (ng L <sup>-1</sup> ) | Frequency (Highest Value) (%) | Average (Highest Value) (ng L <sup>-1</sup> ) | Maximum (Highest Value) (ng L <sup>-1</sup> ) | Reference |
|-----------------|--------------|-----------|-------------------------|-------------------|----------------|-------------------------------|-------------------------------|-----------------------------------------------|-----------------------------------------------|-----------|
|                 | Serbia       | NA        | GS/1                    | 2                 | SPE-LC-MS/MS   | 0.50/1.67                     | 0                             | ND                                            | ND                                            | [72]      |
|                 | South Africa | 2013      | GS/3                    | 3                 | SPE-LC-MS/MS   | 8.1/273                       | NA                            | 3270                                          | NA                                            | [34]      |
|                 | Spain        | 2003/2004 | TP/1                    | 10                | SPE-LC-MS/MS   | 32/NA                         | NA                            | 220                                           | 4300                                          | [54]      |
|                 | Spain        | 2008/2009 | TP/5                    | 33                | SPE-LC-MS/MS   | 9.8/32.7                      | 98                            | 103                                           | 2308                                          | [73]      |
|                 | Spain        | 2008/2009 | TP/3                    | 42                | SPE-LC-MS/MS   | NA/90                         | 0                             | ND                                            | ND                                            | [9]       |
|                 | Spain        | 2009      | TP/3                    | 14                | SPE-LC-MS/MS   | NA/90                         | 0                             | ND                                            | ND                                            | [9]       |
|                 | Spain        | NA        | NA/1                    | 12                | SPE-LC-MS/MS   | NA                            | 0                             | ND                                            | ND                                            | [30]      |
|                 | Sweden       | 2013      | FP/1                    | 7                 | SPE-LC-MS/MS   | NA                            | 14                            | 89                                            | NA                                            | [13]      |
|                 | Taiwan       | NA        | GS/1                    | NA                | SPE-LC-MS/MS   | 0.1                           | NA                            | 6.9                                           | NA                                            | [24]      |
|                 | UK           | 2007      | GS/2                    | 20                | SPE-LC-MS/MS   | NA                            | 93                            | 309                                           | 1575                                          | [35]      |
|                 | UK           | NA        | NA                      | NA                | NA             | NA                            | NA                            | NA                                            | 11733                                         | [43]      |
|                 | USA          | 2010      | TP/1                    | 6                 | SPE-LC-MS/MS   | 2.6/8.7                       | NA                            | 6                                             | NA                                            | [37]      |
|                 | USA          | 2010      | FP/1                    | 6                 | SPE-LC-MS/MS   | 2.5/7.5                       | NA                            | 39                                            | 650                                           | [22]      |
|                 | USA          | 2011      | TP/50                   | 50                | SPE-LC-MS/MS   | 5/NA                          | 14                            | 79                                            | 1560                                          | [69]      |
|                 | USA          | 2014/2015 | GS/2                    | 6                 | SPE-UPLC-MS/MS | NA                            | NA                            | 9.5                                           | 22.2                                          | [74]      |
|                 |              |           |                         |                   |                |                               | 31.8(100)                     | 319.5(3270.0)                                 | 2246.3(22 782)                                |           |
| <b>Total</b>    |              |           |                         |                   |                |                               | <b>64.4(100)</b>              | <b>564.4(12 940)</b>                          | <b>3361.1(67 118)</b>                         |           |
| <b>Hormones</b> |              |           |                         |                   |                |                               |                               |                                               |                                               |           |

| Pharmaceutical | Country       | Year      | Sampling Type/Locations | Number Of Samples | Method          | LOD/LOQ (ng L <sup>-1</sup> ) | Frequency (Highest Value) (%) | Average (Highest Value) (ng L <sup>-1</sup> ) | Maximum (Highest Value) (ng L <sup>-1</sup> ) | Reference |
|----------------|---------------|-----------|-------------------------|-------------------|-----------------|-------------------------------|-------------------------------|-----------------------------------------------|-----------------------------------------------|-----------|
| Estrone (E1)   | Canada        | 2004      | TP/8                    | 8                 | SPE-GC-MS/MS    | 1/NA                          | 87.5                          | 5                                             | 54                                            | [44]      |
|                | EU            | 2010      | GS/90                   | 90                | SPE-LC-MS/MS    | NA                            | 0                             | ND                                            | ND                                            | [68]      |
|                | France        | 2014/2015 | GS/6                    | 24                | SPE-UHPLC-MS/MS | 0.4/1.2                       | NA                            | 14.8                                          | 44.2                                          | [76]      |
|                | Germany       | 2002      | NA/1                    | 18                | SPE-LC-MS/MS    | NA/0.2                        | 100                           | 12.6                                          | NA                                            | [65]      |
|                | International | NA        | 7                       | 70                | NA              | NA                            | NA                            | 16.4                                          | 82                                            | [66]      |
|                | International | NA        | NA                      | NA                | NA              | NA                            | NA                            | 30                                            | 100                                           | [11]      |
|                | Italy         | 2002      | FP/1                    | 7                 | SPE-LC-MS/MS    | 0.8/NA                        | 100                           | 16                                            | 30                                            | [67]      |
|                | Japan         | 2001      | GS/2                    | 2                 | SPE-GC-MS/MS    | 0.1                           | 100                           | 18.3                                          | 34                                            | [89]      |
|                | Japan         | 2001/2003 | TP/5                    | 12                | SPE-GC-MS       | NA                            | NA                            | NA                                            | 110                                           | [52]      |
|                | Korea         | 2004/2005 | GS/7                    | 7                 | SPE-LC-MS/MS    | NA                            | 71                            | 14                                            | 36                                            | [79]      |
|                | Korea         | 2010      | NA/5                    | 5                 | SPE-LC-MS/MS    | NA                            | NA                            | 6                                             | 24                                            | [47]      |
|                | Korea         | NA        | NA                      | NA                | NA              | NA                            | NA                            | NA                                            | 36                                            | [75]      |
|                | Luxembourg    | 2007/2008 | TP/1                    | 24                | SPE-LC-MS/MS    | 0.3/1.0                       | NA                            | NA                                            | 14                                            | [60]      |
|                | NA            | NA        | NA                      | 79                | NA              | NA                            | 93                            | 20.9                                          | 95                                            | [19]      |
|                | Portugal      | NA        | GS/5                    | 9                 | SPE-LC-MS       | 18/60                         | 11                            | NA                                            | 35                                            | [53]      |
|                | Sweden        | NA        | NA                      | NA                | NA              | NA                            | NA                            | NA                                            | 70                                            | [75]      |
|                | UK            | NA        | NA                      | NA                | NA              | NA                            | NA                            | NA                                            | 12                                            | [43]      |
|                | USA           | 2010      | FP/1                    | 6                 | SPE-LC-MS/MS    | 2.2/6.7                       | 0                             | ND                                            | ND                                            | [22]      |
| USA            | 2012/2013     | GS/4      | 28                      | SPE-UPLC-MS/MS    | 6.48/NA         | 4                             | NA                            | 11.3                                          | [87]                                          |           |



| Pharmaceutical     | Country       | Year      | Sampling Type/Locations | Number Of Samples | Method              | LOD/LOQ (ng L <sup>-1</sup> ) | Frequency (Highest Value) (%) | Average (Highest Value) (ng L <sup>-1</sup> ) | Maximum (Highest Value) (ng L <sup>-1</sup> ) | Reference |
|--------------------|---------------|-----------|-------------------------|-------------------|---------------------|-------------------------------|-------------------------------|-----------------------------------------------|-----------------------------------------------|-----------|
| 17β-estradiol (E2) | Canada        | 2004      | TP/8                    | 8                 | SPE-GC-MS/MS        | 1/NA                          | 56.7(100)                     | 12.8(30.0)                                    | 43.8(110.0)                                   | [44]      |
|                    | Canada        | NA        | TP/1                    | NA                | SPE-LDTD-APCI-MS/MS | 162/195                       | NA                            | 290                                           | NA                                            | [51]      |
|                    | EU            | 2010      | GS/90                   | 90                | SPE-LC-MS/MS        | NA                            | 0                             | ND                                            | ND                                            | [68]      |
|                    | France        | 2014/2015 | GS/6                    | 24                | SPE-UHPLC-MS/MS     | 2.2/7.1                       | NA                            | NA                                            | NA                                            | [76]      |
|                    | Germany       | 2002      | NA/1                    | 18                | SPE-LC-MS/MS        | NA/0.4                        | 61                            | 0.8                                           | NA                                            | [65]      |
|                    | International | NA        | 7                       | 70                | NA                  | NA                            | NA                            | 1.3                                           | 3.5                                           | [66]      |
|                    | International | NA        | NA                      | NA                | NA                  | NA                            | NA                            | 10                                            | 80                                            | [11]      |
|                    | Italy         | 2002      | FP/1                    | 7                 | SPE-LC-MS/MS        | 0.8/NA                        | 100                           | 6                                             | 8                                             | [67]      |
|                    | Japan         | 2001      | GS/2                    | 2                 | SPE-GC-MS/MS        | 0.2                           | 100                           | 1.4                                           | 2.5                                           | [89]      |
|                    | Japan         | 2001/2003 | TP/5                    | 12                | SPE-GC-MS           | NA                            | NA                            | NA                                            | 20                                            | [52]      |
|                    | Korea         | 2010      | NA/5                    | 5                 | SPE-LC-MS/MS        | NA                            | 0                             | ND                                            | ND                                            | [47]      |
|                    | Korea         | NA        | NA                      | NA                | NA                  | NA                            | NA                            | NA                                            | <1                                            | [75]      |
|                    | Luxembourg    | 2007/2008 | TP/1                    | 24                | SPE-LC-MS/MS        | 1.0/3.0                       | NA                            | NA                                            | 85                                            | [60]      |
|                    | NA            | NA        | NA                      | 63                | NA                  | NA                            | 74                            | 2.8                                           | 30                                            | [19]      |
|                    | Portugal      | NA        | GS/5                    | 9                 | SPE-LC-MS           | 4/12                          | 0                             | ND                                            | ND                                            | [53]      |
|                    | Sweden        | NA        | NA                      | NA                | NA                  | NA                            | NA                            | NA                                            | 9.2                                           | [75]      |
|                    | UK            | NA        | NA                      | NA                | NA                  | NA                            | NA                            | NA                                            | 1.4                                           | [43]      |
| USA                | 2012/2013     | GS/4      | 28                      | SPE-UPLC-MS/MS    | 6.48/NA             | 4                             | NA                            | 38.3                                          | [87]                                          |           |

| Pharmaceutical                         | Country       | Year      | Sampling Type/Locations | Number Of Samples | Method              | LOD/LOQ (ng L <sup>-1</sup> ) | Frequency (Highest Value) (%) | Average (Highest Value) (ng L <sup>-1</sup> ) | Maximum (Highest Value) (ng L <sup>-1</sup> ) | Reference |
|----------------------------------------|---------------|-----------|-------------------------|-------------------|---------------------|-------------------------------|-------------------------------|-----------------------------------------------|-----------------------------------------------|-----------|
| 17 $\alpha$ -estradiol ( $\alpha$ -E2) | USA           | 2014/2015 | GS/2                    | 6                 | SPE-UPLC-MS/MS      | NA                            | NA                            | ND                                            | ND                                            | [74]      |
|                                        |               |           |                         |                   |                     |                               | 43.2(100)                     | 26.2(290.0)                                   | 18.7(85.0)                                    |           |
|                                        | France        | 2014/2015 | GS/6                    | 24                | SPE-UHPLC-MS/MS     | 2.2/7.1                       | NA                            | NA                                            | NA                                            | [76]      |
|                                        | NA            | NA        | NA                      | 9                 | NA                  | NA                            | 64                            | 0.8                                           | 3.1                                           | [19]      |
| 17 $\alpha$ -ethinylestradiol (EE2)    | USA           | 2010      | FP/1                    | 6                 | SPE-LC-MS/MS        | 1.2/3.5                       | NA                            | <LOQ                                          | 4700                                          | [22]      |
|                                        |               |           |                         |                   |                     |                               | 64.0(64.0)                    | 0.4(0.8)                                      | 2351.6(4700.0)                                |           |
|                                        | Canada        | NA        | TP/1                    | NA                | SPE-LDTD-APCI-MS/MS | 140/203                       | NA                            | 380                                           | NA                                            | [51]      |
|                                        | EU            | 2010      | GS/90                   | 90                | SPE-LC-MS/MS        | NA                            | 0                             | ND                                            | ND                                            | [68]      |
|                                        | Germany       | 2002      | NA/1                    | 18                | SPE-LC-MS/MS        | NA/0.4                        | 100                           | 1.7                                           | NA                                            | [65]      |
|                                        | International | NA        | 7                       | 70                | NA                  | NA                            | NA                            | 0.5                                           | 1.9                                           | [66]      |
|                                        | International | NA        | NA                      | NA                | NA                  | NA                            | NA                            | 3                                             | 10                                            | [11]      |
|                                        | Korea         | 2004/2005 | GS/7                    | 7                 | SPE-LC-MS/MS        | NA                            | 14                            | 1.3                                           | 1.3                                           | [79]      |
|                                        | Korea         | NA        | NA                      | NA                | NA                  | NA                            | NA                            | NA                                            | 1.3                                           | [75]      |
|                                        | Luxembourg    | 2007/2008 | TP/1                    | 24                | SPE-LC-MS/MS        | 2.0/6.0                       | 0                             | ND                                            | ND                                            | [60]      |
|                                        | NA            | NA        | NA                      | 33                | NA                  | NA                            | 59                            | 0.9                                           | 5                                             | [19]      |
|                                        | Portugal      | NA        | GS/5                    | 9                 | SPE-LC-MS           | 21/69                         | 0                             | ND                                            | ND                                            | [53]      |
|                                        | UK            | NA        | NA                      | NA                | NA                  | NA                            | NA                            | NA                                            | 0.47                                          | [43]      |
|                                        | USA           | 2010      | FP/1                    | 6                 | SPE-LC-MS/MS        | 1.3/3.8                       | NA                            | <LOQ                                          | 2.8                                           | [22]      |
|                                        | USA           | 2012/2013 | GS/4                    | 28                | SPE-UPLC-MS/MS      | 6.48/NA                       | 4                             | NA                                            | 11.9                                          | [87]      |

| Pharmaceutical | Country | Year      | Sampling Type/Locations | Number Of Samples | Method         | LOD/LOQ (ng L <sup>-1</sup> ) | Frequency (Highest Value) (%) | Average (Highest Value) (ng L <sup>-1</sup> ) | Maximum (Highest Value) (ng L <sup>-1</sup> ) | Reference |
|----------------|---------|-----------|-------------------------|-------------------|----------------|-------------------------------|-------------------------------|-----------------------------------------------|-----------------------------------------------|-----------|
|                | USA     | 2014/2015 | GS/2                    | 6                 | SPE-UPLC-MS/MS | NA                            | NA                            | ND                                            | ND                                            | [74]      |
|                |         |           |                         |                   |                |                               | 25.3(100)                     | 35.2(380.0)                                   | 2.9(11.9)                                     |           |
| <b>Total</b>   |         |           |                         |                   |                |                               | <b>44.3(100)</b>              | <b>23.1(380.0)</b>                            | <b>123.5(4700.0)</b>                          |           |

CS - Composite sampling  
 ESI- Electrospray ionization  
 FP - Flow proportional sampling  
 FD - Fluorescence detection  
 GC - Gas chromatography  
 GS - Grab sampling  
 HPLC - High performance liquid chromatography  
 HRMS - High resolution mass spectrum  
 LC - Liquid chromatography  
 LDTD-APCI - Laser diode thermal desorption atmospheric pressure chemical ionization  
 LPME - Liquid-phase microextraction  
 LOQ - Limit of quantification  
 MS - Mass spectrometry  
 NA - Not available  
 ND - Not detected  
 SPE - Solid phase extraction  
 TF - TurboFlow  
 TOF - Time-of-flight  
 TP - Time proportional sampling  
 UPLC - Ultra performance liquid chromatography  
 UHPLC - Ultra high performance liquid chromatography



**Table S4. Occurrence of pharmaceuticals in surface waters (SWs).**

| Pharmaceutical     | Country  | Year      | Sampling type/locations | Number of samples | Method         | LOD/LOQ (ng L <sup>-1</sup> ) | Frequency (highest value) (%) | Average (highest value) (ng L <sup>-1</sup> ) | Maximum (highest value) (ng L <sup>-1</sup> ) | Reference |
|--------------------|----------|-----------|-------------------------|-------------------|----------------|-------------------------------|-------------------------------|-----------------------------------------------|-----------------------------------------------|-----------|
| <b>Anxiolytics</b> |          |           |                         |                   |                |                               |                               |                                               |                                               |           |
| Alprazolam (ALP)   | China    | 2014      | GS/12                   | 12                | SPE-LC-MS/MS   | NA/0.1                        | 100                           | 2.5                                           | 4.3                                           | [4]       |
|                    | Portugal | 2009      | GS/6                    | 12                | SPE-LC-MS/MS   | 3/10                          | 0                             | ND                                            | ND                                            | [90]      |
|                    | Portugal | 2016      | GS/31                   | 31                | UHPLC-TOF-MS   | NA/NA                         | 3.2                           | NA                                            | NA                                            | [91]      |
|                    |          |           |                         |                   |                |                               | 34.4(100)                     | 1.3(2.5)                                      | 2.2(4.3)                                      |           |
| Lorazepam (LOR)    | China    | 2015      | GS/12                   | 12                | SPE-LC-MS/MS   | NA/4.5                        | 100                           | 4.0                                           | 5.7                                           | [4]       |
|                    | France   | 2007/2008 | GS/8                    | 24                | SPE-LC-MS/MS   | NA/12                         | 29                            | NA                                            | 1.7                                           | [92]      |
|                    | Italy    | 2011      | CS/2                    | 6                 | SPE-LC-MS/MS   | NA                            | NA                            | NA                                            | 50                                            | [71]      |
|                    | Portugal | 2009      | GS/6                    | 12                | SPE-LC-MS/MS   | 4/13                          | 35                            | 34.3                                          | 49.1                                          | [90]      |
|                    | Serbia   | NA        | GS/14                   | 14                | SPE-LC-MS/MS   | 0.55/1.82                     | 0                             | ND                                            | ND                                            | [72]      |
|                    | Spain    | 2010      | NA/10                   | 10                | TF-LC-MS/MS    | 2.8/9.3                       | NA                            | NA                                            | 50.2                                          | [93]      |
|                    | Spain    | NA        | NA/5                    | 5                 | SPE-UPLC-MS/MS | 0.8/2.6                       | 0                             | ND                                            | ND                                            | [94]      |
|                    |          |           |                         |                   |                |                               | 32.8(100)                     | 9.6(34.3)                                     | 22.4(50.2)                                    |           |
| Zolpidem (ZOL)     | Portugal | 2009      | GS/6                    | 12                | SPE-LC-MS/MS   | 2/5                           | 0                             | ND                                            | ND                                            | [90]      |
|                    |          |           |                         |                   |                |                               | 0.0(0)                        | 0.0(0)                                        | 0.0(0)                                        |           |
| <b>Total</b>       |          |           |                         |                   |                |                               | 29.7(100)                     | 5.8(34.3)                                     | 16.1(50.2)                                    |           |
| <b>Antibiotics</b> |          |           |                         |                   |                |                               |                               |                                               |                                               |           |
| Azithromycin (AZI) | China    | 2009      | GS/10                   | 23                | SPE-LC-MS/MS   | NA/0.26                       | 91                            | 22.3                                          | 88                                            | [95]      |

| Pharmaceutical | Country                         | Year      | Sampling type/locations | Number of samples | Method           | LOD/LOQ (ng L <sup>-1</sup> ) | Frequency (highest value) (%) | Average (highest value) (ng L <sup>-1</sup> ) | Maximum (highest value) (ng L <sup>-1</sup> ) | Reference |
|----------------|---------------------------------|-----------|-------------------------|-------------------|------------------|-------------------------------|-------------------------------|-----------------------------------------------|-----------------------------------------------|-----------|
|                | China                           | NA        | NA                      | NA                | NA               | NA                            | NA                            | NA                                            | 4.7                                           | [96]      |
|                | Croatia                         | 2012/2014 | GS/38                   | 148               | SPE-LC-ESI-MS/MS | NA/200                        | NA                            | NA                                            | 1100                                          | [97]      |
|                | Germany                         | 2001/2002 | NA/8                    | 8                 | SPE-LC-MS/MS     | NA/1                          | 50                            | 4                                             | 13                                            | [98]      |
|                | Ghana                           | 2010/2011 | GS/19                   | 26                | SPE-LC-MS/MS     | NA/NA                         | 8                             | 14                                            | 27                                            | [99]      |
|                | International                   | NA        | NA                      | NA                | NA               | NA                            | 40.8                          | 188                                           | 1547                                          | [100]     |
|                | Italy                           | 2011      | CS/2                    | 6                 | SPE-LC-MS/MS     | NA                            | NA                            | NA                                            | 7                                             | [71]      |
|                | Italy                           | NA        | CP/1                    | 4                 | SPE-LC-MS/MS     | 1/NA                          | NA                            | 7                                             | NA                                            | [17]      |
|                | Japan                           | 2005      | NA/7                    | 7                 | SPE-LC-MS/MS     | NA/0.5                        | 14                            | 208                                           | 448                                           | [101]     |
|                | Japan                           | 2006/2007 | GS/37                   | 37                | SPE-LC-MS/MS     | NA/0.03                       | 49                            | 30                                            | 138                                           | [18]      |
|                | Kenya                           | 2011      | GS/12                   | 12                | SPE-LC-MS/MS     | NA/NA                         | 0                             | ND                                            | ND                                            | [99]      |
|                | Mozambique                      | 2013      | GS/7                    | 7                 | SPE-LC-MS/MS     | NA/NA                         | 14                            | 6                                             | 6                                             | [99]      |
|                | Pakistan                        | 2012      | GS/19                   | 40                | LC-MS/MS         | NA/NA                         | 23                            | 11.4                                          | 21                                            | [102]     |
|                | Pakistan (near drug facilities) | 2012      | GS/4                    | 4                 | LC-MS/MS         | NA/NA                         | 100                           | 13.8                                          | 35                                            | [102]     |
|                | Portugal                        | 2009      | GS/6                    | 12                | SPE-LC-MS/MS     | 4/13                          | 33                            | 135.2                                         | 163                                           | [90]      |
|                | Portugal                        | 2016      | GS/31                   | 31                | UHPLC-TOF-MS     | NA/NA                         | 9.7                           | NA                                            | NA                                            | [91]      |
|                | Serbia                          | NA        | GS/14                   | 14                | SPE-LC-MS/MS     | 2.58/8.59                     | 21                            | 57                                            | 81                                            | [72]      |
|                | South Africa                    | 2012      | GS/16                   | 16                | SPE-LC-MS/MS     | NA/NA                         | 25                            | 1.7                                           | 3.3                                           | [99]      |

| Pharmaceutical       | Country  | Year      | Sampling type/locations | Number of samples | Method          | LOD/LOQ (ng L <sup>-1</sup> ) | Frequency (highest value) (%) | Average (highest value) (ng L <sup>-1</sup> ) | Maximum (highest value) (ng L <sup>-1</sup> ) | Reference |
|----------------------|----------|-----------|-------------------------|-------------------|-----------------|-------------------------------|-------------------------------|-----------------------------------------------|-----------------------------------------------|-----------|
|                      | Spain    | 2005/2006 | NA/7                    | 21                | SPE-LC-MS/MS    | 1/NA                          | 0                             | ND                                            | ND                                            | [103]     |
|                      | Spain    | 2010      | NA/10                   | 10                | TF-LC-MS/MS     | 3.2/10.6                      | NA                            | NA                                            | 41.1                                          | [93]      |
|                      | Spain    | 2011      | GS/5                    | 5                 | SPE-UPLC-MS/MS  | 0.6/2.1                       | NA                            | NA                                            | 130                                           | [21]      |
|                      | Portugal | 2013/2014 | GS/5                    | 55                | SPE-UHPLC-MS/MS | 0.04/0.10                     | 18.2                          | NA                                            | 29.6                                          | [20]      |
|                      | Spain    | NA        | NA/10                   | 10                | SPE-LC-MS/MS    | 1/3                           | NA                            | 8                                             | 20                                            | [14]      |
|                      | Spain    | NA        | 5                       | 5                 | SPE-UPLC-MS/MS  | 0.2/0.5                       | 0                             | ND                                            | ND                                            | [94]      |
|                      | Spain    | NA        | 5                       | 5                 | SPE-UPLC-MS/MS  | 0.7/2.3                       | 0                             | ND                                            | ND                                            | [94]      |
|                      | USA      | 2001      | NA/74                   | 74                | SPE-LC-MS/MS    | 23/NA                         | 1.4                           | ND                                            | 29                                            | [104]     |
|                      | USA      | 2008/2009 | GS/29                   | 42                | SPE-LC-MS/MS    | 2.5/3.6                       | 52                            | 382                                           | 2800                                          | [105]     |
|                      | USA      | 2008/2009 | GS/7                    | 42                | SPE-LC-MS/MS    | 3.7/11.0                      | 23.8                          | 10.7                                          | 21.7                                          | [106]     |
|                      | USA      | 2014/2015 | GS/2                    | 12                | SPE-UPLC-MS/MS  | NA                            | NA                            | ND                                            | ND                                            | [74]      |
|                      | Vietnam  | 2005      | NA/4                    | 4                 | SPE-LC-MS/MS    | NA/0.5                        | 0                             | ND                                            | ND                                            | [101]     |
|                      | Vietnam  | 2007      | NA/10                   | 20                | SPE-LC-MS/MS    | NA/7.0                        | 5                             | 90.8                                          | 90.8                                          | [107]     |
|                      |          |           |                         |                   |                 |                               | 25.2(100)                     | 49.6(382.0)                                   | 236.0(2800.0)                                 |           |
| Clarithromycin (CLA) | China    | 2009      | GS/10                   | 23                | SPE-LC-MS/MS    | NA/0.25                       | 87                            | 5.0                                           | 32.9                                          | [95]      |
|                      | China    | 2012/2013 | GS/20                   | 20                | SPE-LC-MS/MS    | NA/NA                         | 85                            | 15.0                                          | 103                                           | [108]     |

| Pharmaceutical | Country                         | Year      | Sampling type/locations | Number of samples | Method         | LOD/LOQ (ng L <sup>-1</sup> ) | Frequency (highest value) (%) | Average (highest value) (ng L <sup>-1</sup> ) | Maximum (highest value) (ng L <sup>-1</sup> ) | Reference |
|----------------|---------------------------------|-----------|-------------------------|-------------------|----------------|-------------------------------|-------------------------------|-----------------------------------------------|-----------------------------------------------|-----------|
|                | China                           | NA        | NA                      | NA                | NA             | NA                            | NA                            | NA                                            | 180                                           | [96]      |
|                | Germany                         | 2001/2002 | NA/8                    | 8                 | SPE-LC-MS/MS   | NA/0.5                        | 75                            | 37                                            | 37                                            | [98]      |
|                | Ghana                           | 2010/2011 | GS/19                   | 26                | SPE-LC-MS/MS   | NA/NA                         | 50                            | 0.3                                           | 26                                            | [99]      |
|                | International                   | NA        | NA                      | NA                | NA             | NA                            | 53.9                          | 16.5                                          | 260                                           | [100]     |
|                | Italy                           | 2001      | GS/8                    | 8                 | SPE-LC-MS/MS   | 0.01/0.02                     | 100                           | 4.7                                           | 20.3                                          | [109]     |
|                | Italy                           | 2007/2008 | TP/8                    | 8                 | SPE-LC-MS/MS   | NA/NA                         | 100                           | 13.6                                          | 44.8                                          | [23]      |
|                | Italy                           | 2011      | CS/2                    | 6                 | SPE-LC-MS/MS   | NA                            | NA                            | NA                                            | 100                                           | [71]      |
|                | Italy                           | NA        | CP/1                    | 4                 | SPE-LC-MS/MS   | 1/NA                          | NA                            | 6                                             | NA                                            | [17]      |
|                | Japan                           | 2005      | NA/7                    | 7                 | SPE-LC-MS/MS   | NA/0.1                        | 100                           | 143.2                                         | 254                                           | [101]     |
|                | Japan                           | 2006/2007 | GS/37                   | 37                | SPE-LC-MS/MS   | NA/0.1                        | 100                           | 45                                            | 233                                           | [18]      |
|                | Kenya                           | 2011      | GS/12                   | 12                | SPE-LC-MS/MS   | NA/NA                         | 83                            | 87                                            | 439                                           | [99]      |
|                | Korea                           | 2006      | NA/5                    | 5                 | SPE-LC-MS/MS   | 1/4                           | 60                            | 202                                           | 443                                           | [110]     |
|                | Korea                           | 2016      | GS/18                   | 72                | SPE-LC-MS/MS   | NA/10.9                       | 43.1                          | 42.7                                          | 475.1                                         | [111]     |
|                | Mozambique                      | 2013      | GS/7                    | 7                 | SPE-LC-MS/MS   | NA/NA                         | 100                           | 6.1                                           | 13                                            | [99]      |
|                | Pakistan                        | 2012      | GS/19                   | 40                | LC-MS/MS       | NA/NA                         | 100                           | 19.8                                          | 130                                           | [102]     |
|                | Pakistan (near drug facilities) | 2012      | GS/4                    | 4                 | LC-MS/MS       | NA/NA                         | 100                           | 110                                           | 360                                           | [102]     |
|                | Portugal                        | 2013      | GS/NA                   | NA                | SPE-UPLC-MS/MS | NA/NA                         | NA                            | NA                                            | 32                                            | [112]     |



| Pharmaceutical      | Country                      | Year      | Sampling type/locations | Number of samples | Method          | LOD/LOQ (ng L <sup>-1</sup> ) | Frequency (highest value) (%) | Average (highest value) (ng L <sup>-1</sup> ) | Maximum (highest value) (ng L <sup>-1</sup> ) | Reference |
|---------------------|------------------------------|-----------|-------------------------|-------------------|-----------------|-------------------------------|-------------------------------|-----------------------------------------------|-----------------------------------------------|-----------|
|                     | Portugal                     | 2013/2014 | GS/5                    | 55                | SPE-UHPLC-MS/MS | 0.08/0.25                     | 12.7                          | NA                                            | 26.8                                          | [20]      |
|                     | South Africa                 | 2012      | GS/16                   | 16                | SPE-LC-MS/MS    | NA/NA                         | 100                           | 28                                            | 302                                           | [99]      |
|                     | Spain                        | 2010      | NA/10                   | 10                | TF-LC-MS/MS     | 4.9/16.3                      | 100                           | NA                                            | 141                                           | [93]      |
|                     | Spain                        | 2011      | GS/5                    | 5                 | SPE-UPLC-MS/MS  | 0.4/1.2                       | NA                            | NA                                            | 125                                           | [21]      |
|                     | Spain                        | NA        | 5                       | 5                 | SPE-UPLC-MS/MS  | 0.3/0.9                       | 80                            | 16.8                                          | 32.8                                          | [94]      |
|                     | USA                          | 2008/2009 | GS/29                   | 42                | SPE-LC-MS/MS    | 2.6/4.1                       | 14                            | 117                                           | 370                                           | [105]     |
|                     | USA                          | 2008/2009 | GS/7                    | 42                | SPE-LC-MS/MS    | 3.2/9.6                       | 0                             | ND                                            | ND                                            | [106]     |
|                     | Vietnam                      | 2005      | NA/4                    | 4                 | SPE-LC-MS/MS    | NA/0.1                        | 0                             | ND                                            | ND                                            | [101]     |
|                     | Vietnam                      | 2007      | NA/10                   | 20                | SPE-LC-MS/MS    | NA/0.2                        | 40                            | 205                                           | 778                                           | [107]     |
|                     |                              |           |                         |                   |                 |                               | 68.9(100)                     | 50.9(205.0)                                   | 183.7(778.0)                                  |           |
| Ciprofloxacin (CIP) | America                      | NA        | NA                      | NA                | NA              | NA                            | NA                            | NA                                            | 77                                            | [75]      |
|                     | Canada                       | 2006/2007 | GS/17                   | 125               | SPE-LC-MS/MS    | NA                            | 0                             | ND                                            | ND                                            | [113]     |
|                     | China                        | 2009      | GS/10                   | 23                | SPE-LC-MS/MS    | NA/3.3                        | 91                            | 101                                           | 346                                           | [95]      |
|                     | China                        | NA        | NA                      | NA                | NA              | NA                            | NA                            | NA                                            | 459                                           | [96]      |
|                     | Germany                      | 2001/2002 | NA/8                    | 8                 | SPE-LC-MS/MS    | NA/5.0                        | 12.5                          | 9                                             | 9                                             | [98]      |
|                     | India (near drug facilities) | 2008      | GS/11                   | NA                | SPE-LC-MS       | NA/10                         | NA                            | NA                                            | 650 000                                       | [77]      |
|                     | International                | NA        | NA                      | NA                | NA              | NA                            | 33.4                          | 163 674                                       | 650 000                                       | [100]     |

| Pharmaceutical | Country                         | Year      | Sampling type/locations | Number of samples | Method          | LOD/LOQ (ng L <sup>-1</sup> ) | Frequency (highest value) (%) | Average (highest value) (ng L <sup>-1</sup> ) | Maximum (highest value) (ng L <sup>-1</sup> ) | Reference |
|----------------|---------------------------------|-----------|-------------------------|-------------------|-----------------|-------------------------------|-------------------------------|-----------------------------------------------|-----------------------------------------------|-----------|
|                | Italy                           | 2001      | GS/8                    | 8                 | SPE-LC-MS/MS    | 0.08/0.27                     | 25                            | 20.3                                          | 26.2                                          | [109]     |
|                | Italy                           | 2007/2008 | TP/8                    | 8                 | SPE-LC-MS/MS    | NA/NA                         | 100                           | 13.9                                          | 15.5                                          | [23]      |
|                | Italy                           | 2011      | CS/2                    | 6                 | SPE-LC-MS/MS    | NA                            | NA                            | NA                                            | 70                                            | [71]      |
|                | Italy                           | NA        | CS/1                    | 4                 | SPE-LC-MS/MS    | 1/NA                          | NA                            | 25                                            | NA                                            | [17]      |
|                | Korea                           | 2007      | GS/5                    | 5                 | SPE-LC-MS/MS    | NA                            | 0                             | ND                                            | ND                                            | [27]      |
|                | Lebanon                         | 2016      | GS/18                   | 18                | SPE-LC-MS/MS    | 29.9/NA                       | 5.5                           | 108                                           | NA                                            | [114]     |
|                | Pakistan                        | 2012      | GS/19                   | 40                | LC-MS/MS        | NA/NA                         | 62                            | 16.9                                          | 110                                           | [102]     |
|                | Pakistan (near drug facilities) | 2012      | GS/4                    | 4                 | LC-MS/MS        | NA/NA                         | 100                           | 1265                                          | 6200                                          | [102]     |
|                | Portugal                        | 2006/2007 | GS/22                   | 22                | SPE-LC-FD       | ns/25                         | 36                            | NA                                            | 119.2                                         | [115]     |
|                | Portugal                        | 2009      | GS/6                    | 12                | SPE-LC-MS/MS    | 10/33                         | 8                             | 59.3                                          | 59.3                                          | [90]      |
|                | Portugal                        | 2013/2014 | GS/5                    | 55                | SPE-UHPLC-MS/MS | 1.20/3.64                     | 1.82                          | 88.7                                          | 88.7                                          | [20]      |
|                | Portugal                        | 2016      | GS/31                   | 31                | UHPLC-TOF-MS    | NA/NA                         | 29.0                          | 3.9                                           | 7.1                                           | [91]      |
|                | Spain                           | 2010      | NA/10                   | 10                | TF-LC-MS/MS     | 7.0/23.4                      | NA                            | NA                                            | <LOQ                                          | [93]      |
|                | Spain                           | 2011      | GS/5                    | 5                 | SPE-UPLC-MS/MS  | 1.7/5.7                       | NA                            | NA                                            | 250                                           | [21]      |
|                | Spain                           | 2016/2017 | GS/23                   | 321               | SPE-LC-MS/MS    | NA/0.3                        | 21.25                         | 29.25                                         | 540                                           | [78]      |
|                | USA                             | 1999/2000 | CS/NA                   | 115               | SPE-UPLC-MS/MS  | 20/NA                         | 2.6                           | 20                                            | 30                                            | [116]     |

| Pharmaceutical     | Country       | Year      | Sampling type/locations | Number of samples | Method           | LOD/LOQ (ng L <sup>-1</sup> ) | Frequency (highest value) (%) | Average (highest value) (ng L <sup>-1</sup> ) | Maximum (highest value) (ng L <sup>-1</sup> ) | Reference |
|--------------------|---------------|-----------|-------------------------|-------------------|------------------|-------------------------------|-------------------------------|-----------------------------------------------|-----------------------------------------------|-----------|
|                    | USA           | 2001      | NA/74                   | 74                | SPE-LC-MS/MS     | 20/NA                         | 1.4                           | ND                                            | 30                                            | [104]     |
|                    | USA           | 2008/2009 | GS/7                    | 42                | SPE-LC-MS/MS     | 3.3/9.9                       | 0                             | ND                                            | ND                                            | [106]     |
|                    | USA           | NA        | NA                      | NA                | NA               | NA                            | NA                            | NA                                            | 30                                            | [117]     |
|                    |               |           |                         |                   |                  |                               | 29.4(100)                     | 9 190.8(163 674)                              | 54 519.5(650 000)                             |           |
| Erythromycin (ERY) | Canada        | 2006/2007 | GS/17                   | 125               | SPE-LC-MS/MS     | NA/10                         | 10                            | 0.4                                           | 145                                           | [113]     |
|                    | China         | 2009      | GS/10                   | 23                | SPE-LC-MS/MS     | NA/0.23                       | 100                           | 62.1                                          | 282                                           | [95]      |
|                    | China         | 2012/2013 | GS/20                   | 20                | SPE-LC-MS/MS     | NA/NA                         | 95                            | 239.6                                         | 808                                           | [108]     |
|                    | China         | NA        | NA                      | NA                | NA               | NA                            | NA                            | NA                                            | 1540                                          | [96]      |
|                    | Croatia       | 2012/2014 | GS/38                   | 148               | SPE-LC-ESI-MS/MS | NA/200                        | NA                            | NA                                            | 5300                                          | [97]      |
|                    | Germany       | 2001/2002 | NA/8                    | 8                 | SPE-LC-MS/MS     | NA/2.0                        | 100                           | 72.8                                          | 190                                           | [98]      |
|                    | Ghana         | 2010/2011 | GS/19                   | 26                | SPE-LC-MS/MS     | NA/NA                         | 81                            | 115                                           | 645                                           | [99]      |
|                    | International | NA        | NA                      | NA                | NA               | NA                            | 55.5                          | 51                                            | 90 000                                        | [100]     |
|                    | Italy         | 2001      | GS/8                    | 8                 | SPE-LC-MS/MS     | 0.08/0.29                     | 100                           | 4.7                                           | 15.9                                          | [109]     |
|                    | Italy         | 2007/2008 | TP/8                    | 8                 | SPE-LC-MS/MS     | NA/NA                         | 100                           | 10.8                                          | 30.5                                          | [23]      |
|                    | Italy         | NA        | CP/1                    | 4                 | SPE-LC-MS/MS     | 4/NA                          | 0                             | ND                                            | ND                                            | [17]      |
|                    | Japan         | 2005      | NA/7                    | 7                 | SPE-LC-MS/MS     | NA/0.6                        | 14                            | 76.8                                          | 120                                           | [101]     |
|                    | Japan         | 2006/2007 | GS/37                   | 37                | SPE-LC-MS/MS     | NA/0.02                       | 95                            | 20                                            | 123                                           | [18]      |

| Pharmaceutical | Country                         | Year      | Sampling type/locations | Number of samples | Method       | LOD/LOQ (ng L <sup>-1</sup> ) | Frequency (highest value) (%) | Average (highest value) (ng L <sup>-1</sup> ) | Maximum (highest value) (ng L <sup>-1</sup> ) | Reference |
|----------------|---------------------------------|-----------|-------------------------|-------------------|--------------|-------------------------------|-------------------------------|-----------------------------------------------|-----------------------------------------------|-----------|
|                | Japan                           | 2006/2010 | GS/8                    | 27                | SPE-LC-MS/MS | NA/10.0                       | 0                             | ND                                            | ND                                            | [118]     |
|                | Japan                           | NA        | NA                      | NA                | NA           | NA                            | NA                            | NA                                            | 450                                           | [117]     |
|                | Kenya                           | 2011      | GS/12                   | 12                | SPE-LC-MS/MS | NA/NA                         | 100                           | 679                                           | 2800                                          | [99]      |
|                | Korea                           | 2004/2005 | GS/3                    | 8                 | SPE-LC-MS/MS | NA                            | 63                            | 3.4                                           | 4.8                                           | [79]      |
|                | Korea                           | 2006      | NA/5                    | 5                 | SPE-LC-MS/MS | 1/4                           | 80                            | 65                                            | 137                                           | [110]     |
|                | Korea                           | 2007      | GS/5                    | 5                 | SPE-LC-MS/MS | NA                            | NA                            | NA                                            | 150                                           | [27]      |
|                | Lebanon                         | 2016      | GS/18                   | 18                | SPE-LC-MS/MS | 27/NA                         | 16.6                          | 603                                           | 2806                                          | [114]     |
|                | Mozambique                      | 2013      | GS/7                    | 7                 | SPE-LC-MS/MS | NA/NA                         | 100                           | 903                                           | 2700                                          | [99]      |
|                | Netherlands                     | 2009      | GS/14                   | 14                | SPE-LC-MS/MS | NA                            | 29                            | 10                                            | 35                                            | [119]     |
|                | Pakistan                        | 2012      | GS/19                   | 40                | LC-MS/MS     | NA/NA                         | 93                            | 39.2                                          | 310                                           | [102]     |
|                | Pakistan (near drug facilities) | 2012      | GS/4                    | 4                 | LC-MS/MS     | NA/NA                         | 100                           | 298                                           | 1100                                          | [102]     |
|                | Portugal                        | 2016      | GS/31                   | 31                | UHPLC-TOF-MS | NA/NA                         | 0.0                           | 0.0                                           | 0.0                                           | [91]      |
|                | Scotland                        | 2005/2006 | GS/4                    | 40                | SPE-LC-MS/MS | 0.1/0.3                       | 0                             | ND                                            | ND                                            | [80]      |
|                | Serbia                          | NA        | GS/14                   | 14                | SPE-LC-MS/MS | 1.65/5.48                     | 0                             | ND                                            | ND                                            | [72]      |
|                | South Africa                    | 2012      | GS/16                   | 16                | SPE-LC-MS/MS | NA/NA                         | 100                           | 136                                           | 493                                           | [99]      |
|                | South Africa                    | 2013      | GS/12                   | 12                | SPE-LC-MS/MS | 0.4/0.4                       | 42                            | 130                                           | 260                                           | [34]      |
|                | Spain                           | 2005/2006 | NA/7                    | 21                | SPE-LC-MS/MS | 4/NA                          | 60                            | 30                                            | 70                                            | [103]     |

| Pharmaceutical   | Country | Year      | Sampling type/locations | Number of samples | Method         | LOD/LOQ (ng L <sup>-1</sup> ) | Frequency (highest value) (%) | Average (highest value) (ng L <sup>-1</sup> ) | Maximum (highest value) (ng L <sup>-1</sup> ) | Reference |
|------------------|---------|-----------|-------------------------|-------------------|----------------|-------------------------------|-------------------------------|-----------------------------------------------|-----------------------------------------------|-----------|
|                  | Spain   | 2006      | GS/8                    | 16                | SPE-LC-MS/MS   | NA                            | 93                            | 32.9                                          | 111.9                                         | [120]     |
|                  | Spain   | 2010      | NA/10                   | 10                | TF-LC-MS/MS    | 7.0/23.4                      | NA                            | NA                                            | 1.0                                           | [93]      |
|                  | Spain   | NA        | NA/10                   | 10                | SPE-LC-MS/MS   | 4/14                          | NA                            | 17                                            | 30                                            | [14]      |
|                  | Spain   | NA        | NA/7                    | 7                 | SPE-LC-MS/MS   | NA                            | 86                            | 21                                            | 46.7                                          | [121]     |
|                  | Spain   | NA        | 5                       | 5                 | SPE-UPLC-MS/MS | 6.7/22.4                      | 0                             | ND                                            | ND                                            | [94]      |
|                  | Taiwan  | 2007/2008 | GS/15                   | 15                | SPE-LC-MS/MS   | 1.0/NA                        | 92                            | NA                                            | 75 500                                        | [122]     |
|                  | UK      | 2007      | GS/2                    | 40                | SPE-LC-MS/MS   | NA                            | 51                            | 18                                            | 131                                           | [35]      |
|                  | UK      | NA        | GS/2                    | 2                 | SPE-LC-MS/MS   | 10/NA                         | 100                           | 529                                           | 1000                                          | [81]      |
|                  | UK      | NA        | NA                      | NA                | NA             | NA                            | NA                            | NA                                            | 1022                                          | [36]      |
|                  | USA     | 1999/2000 | CS/NA                   | 104               | SPE-UPLC-MS/MS | 50/NA                         | 21.5                          | 100                                           | 1700                                          | [116]     |
|                  | USA     | 2001      | NA/74                   | 73                | SPE-LC-MS/MS   | 50/NA                         | 8.1                           | ND                                            | 300                                           | [104]     |
|                  | USA     | 2014/2015 | GS/2                    | 12                | SPE-UPLC-MS/MS | NA                            | NA                            | ND                                            | ND                                            | [74]      |
|                  | Vietnam | 2005      | NA/4                    | 4                 | SPE-LC-MS/MS   | NA/0.6                        | 100                           | 26.9                                          | 41                                            | [101]     |
|                  | Vietnam | 2007      | NA/10                   | 20                | SPE-LC-MS/MS   | NA/1.0                        | 60                            | 518                                           | 2246                                          | [107]     |
|                  |         |           |                         |                   |                |                               | 59.6(100)                     | 130.1(903.0)                                  | 4378.3(90 000)                                |           |
| Total            |         |           |                         |                   |                |                               | 48.4(100)                     | 1708.5(163 674)                               | 12 200.9(650 000)                             |           |
| Lipid regulators |         |           |                         |                   |                |                               |                               |                                               |                                               |           |

| Pharmaceutical    | Country       | Year      | Sampling type/locations | Number of samples | Method       | LOD/LOQ (ng L <sup>-1</sup> ) | Frequency (highest value) (%) | Average (highest value) (ng L <sup>-1</sup> ) | Maximum (highest value) (ng L <sup>-1</sup> ) | Reference |
|-------------------|---------------|-----------|-------------------------|-------------------|--------------|-------------------------------|-------------------------------|-----------------------------------------------|-----------------------------------------------|-----------|
| Bezafibrate (BEZ) | Brazil        | 1996      | TP/17                   | 17                | SPE-GC-MS    | 35/NA                         | NA                            | NA                                            | 180                                           | [38]      |
|                   | Canada        | 2006/2007 | GS/17                   | 125               | SPE-LC-MS/MS | NA/0.5                        | 10                            | 0.2                                           | 3.6                                           | [113]     |
|                   | China         | NA        | NA                      | NA                | NA           | NA                            | NA                            | NA                                            | 20                                            | [96]      |
|                   | France        | 2007/2008 | GS/8                    | 24                | SPE-LC-MS/MS | NA/1                          | 63                            | NA                                            | 12.4                                          | [92]      |
|                   | Germany       | 2007      | TP/2                    | 36                | SPE-LC-MS/MS | NA/12                         | NA                            | 71                                            | 280                                           | [123]     |
|                   | International | NA        | NA                      | NA                | NA           | NA                            | 58                            | 85                                            | 15 060                                        | [100]     |
|                   | Italy         | 2001      | GS/8                    | 8                 | SPE-LC-MS/MS | 0.02/0.05                     | 100                           | 8.8                                           | 57.2                                          | [109]     |
|                   | Italy         | 2011      | CS/2                    | 6                 | SPE-LC-MS/MS | NA                            | NA                            | NA                                            | 10                                            | [71]      |
|                   | Japan         | 2006/2010 | GS/8                    | 27                | SPE-LC-MS/MS | NA/3.0                        | 48.1                          | 91.2                                          | 498                                           | [118]     |
|                   | Mexico        | 2015/2016 | TP/4                    | 16                | SPE-LC-MS/MS | 0.3/1.0                       | 100                           | 908.5                                         | 2100                                          | [41]      |
|                   | Netherlands   | 2009      | GS/14                   | 14                | SPE-LC-MS/MS | NA                            | 14                            | 5                                             | 17                                            | [119]     |
|                   | Portugal      | 2009      | GS/6                    | 12                | SPE-LC-MS/MS | 3/10                          | 67                            | 265.9                                         | 770                                           | [90]      |
|                   | Portugal      | 2016      | GS/31                   | 31                | UHPLC-TOF-MS | NA/NA                         | 87.1                          | 3.3                                           | 13.4                                          | [91]      |
|                   | Spain         | 2005/2006 | NA/7                    | 21                | SPE-LC-MS/MS | 1/NA                          | 95                            | 1020                                          | 15 060                                        | [103]     |
|                   | Spain         | 2006      | GS/8                    | 16                | SPE-LC-MS/MS | NA                            | 100                           | 48.3                                          | 305.2                                         | [120]     |
| Spain             | 2010          | NA/10     | 10                      | TF-LC-MS/MS       | 0.2/0.6      | NA                            | NA                            | 51.3                                          | [93]                                          |           |
| Spain             | 2012          | GS/22     | 22                      | SPE-UPLC-MS/MS    | NA/0.7       | 36                            | 4                             | 21                                            | [42]                                          |           |

| Pharmaceutical    | Country       | Year      | Sampling type/locations | Number of samples | Method         | LOD/LOQ (ng L <sup>-1</sup> ) | Frequency (highest value) (%) | Average (highest value) (ng L <sup>-1</sup> ) | Maximum (highest value) (ng L <sup>-1</sup> ) | Reference |
|-------------------|---------------|-----------|-------------------------|-------------------|----------------|-------------------------------|-------------------------------|-----------------------------------------------|-----------------------------------------------|-----------|
|                   | Spain         | 2016/2017 | GS/23                   | 321               | SPE-LC-MS/MS   | NA/0.3                        | 28.5                          | 6.75                                          | 67                                            | [78]      |
|                   | Spain         | NA        | NA/10                   | 10                | SPE-LC-MS/MS   | 1/4                           | NA                            | 8                                             | 10                                            | [14]      |
|                   | Spain         | NA        | NA/7                    | 7                 | SPE-LC-MS/MS   | NA                            | 100                           | 975                                           | 5960                                          | [121]     |
|                   | Spain         | NA        | NA/5                    | 5                 | SPE-UPLC-MS/MS | 0.1/0.4                       | 80                            | 4.3                                           | 7.2                                           | [94]      |
|                   | Sweden        | 2014      | TP/8                    | 8                 | SPE-UPLC-MS/MS | NA/0.04                       | 100                           | 20.4                                          | 110                                           | [124]     |
|                   | UK            | NA        | NA                      | NA                | NA             | NA                            | NA                            | NA                                            | 90                                            | [43]      |
|                   | UK            | 2007      | GS/2                    | 40                | SPE-LC-MS/MS   | NA                            | 53                            | 23                                            | 64                                            | [35]      |
|                   |               |           |                         |                   |                |                               | 67.0(100)                     | 197.1(1020.0)                                 | 1698.6(15 060)                                |           |
| Gemfibrozil (GEM) | Brazil        | 1996      | TP/17                   | 17                | SPE-GC-MS      | 10/NA                         | 0                             | ND                                            | ND                                            | [38]      |
|                   | Canada        | 2005      | GS/2                    | 8                 | SPE-GC-MS      | 0.3/NA                        | 55.6                          | 14.5                                          | 35.3                                          | [83]      |
|                   | Canada        | 2006/2007 | GS/17                   | 125               | SPE-LC-MS/MS   | NA/1                          | 33                            | 0.7                                           | 9                                             | [113]     |
|                   | China         | 2007      | GS/14                   | 14                | SPE-GC-MS      | 1.8/6.1                       | 14                            | 15.9                                          | 17.4                                          | [125]     |
|                   | China         | 2012/2013 | GS/20                   | 20                | SPE-LC-MS/MS   | NA/NA                         | 0                             | ND                                            | ND                                            | [108]     |
|                   | China         | 2013      | GS/19                   | 57                | SPE-LC-MS/MS   | 0.01/NA                       | 79                            | 0.1                                           | 2.3                                           | [126]     |
|                   | China         | NA        | NA                      | NA                | NA             | NA                            | NA                            | NA                                            | 86.8                                          | [96]      |
|                   | Costa Rica    | NA        | NA                      | NA                | NA             | NA                            | NA                            | NA                                            | 17 036                                        | [33]      |
|                   | International | NA        | NA                      | NA                | NA             | NA                            | 45.3                          | 103                                           | 7780                                          | [100]     |
|                   | Korea         | 2004/2005 | GS/3                    | 8                 | SPE-LC-MS/MS   | NA                            | 34                            | 6.6                                           | 9.1                                           | [79]      |

| Pharmaceutical | Country  | Year      | Sampling type/locations | Number of samples | Method         | LOD/LOQ (ng L <sup>-1</sup> ) | Frequency (highest value) (%) | Average (highest value) (ng L <sup>-1</sup> ) | Maximum (highest value) (ng L <sup>-1</sup> ) | Reference |
|----------------|----------|-----------|-------------------------|-------------------|----------------|-------------------------------|-------------------------------|-----------------------------------------------|-----------------------------------------------|-----------|
|                | Korea    | 2007      | GS/5                    | 5                 | SPE-LC-MS/MS   | NA                            | 0                             | ND                                            | ND                                            | [27]      |
|                | Mexico   | 2015/2016 | TP/4                    | 16                | SPE-LC-MS/MS   | 0.2/0.5                       | 100                           | 55.3                                          | 368                                           | [41]      |
|                | NA       | NA        | NA                      | NA                | NA             | NA                            | NA                            | NA                                            | 52                                            | [85]      |
|                | Portugal | 2009      | GS/6                    | 12                | SPE-LC-MS/MS   | 10/33                         | 50                            | 57.8                                          | 91.2                                          | [90]      |
|                | Portugal | 2013      | GS/NA                   | NA                | SPE-UPLC-MS/MS | NA/NA                         | NA                            | NA                                            | 16                                            | [112]     |
|                | Portugal | 2016      | GS/31                   | 31                | UHPLC-TOF-MS   | NA/NA                         | 67.7                          | 23.1                                          | 77.0                                          | [91]      |
|                | Spain    | 2005/2006 | NA/7                    | 21                | SPE-LC-MS/MS   | 1/NA                          | 100                           | 1420                                          | 7780                                          | [103]     |
|                | Spain    | 2006      | GS/8                    | 16                | SPE-LC-MS/MS   | NA                            | 100                           | 242.8                                         | 1014.1                                        | [120]     |
|                | Spain    | 2010      | NA/10                   | 10                | TF-LC-MS/MS    | 19.8/66.1                     | NA                            | NA                                            | 113                                           | [93]      |
|                | Spain    | 2012      | GS/22                   | 22                | SPE-UPLC-MS/MS | NA/1.3                        | 100                           | 77                                            | 934                                           | [42]      |
|                | Spain    | NA        | NA/10                   | 10                | SPE-LC-MS/MS   | 1/3                           | NA                            | 46                                            | 60                                            | [14]      |
|                | Spain    | NA        | NA/7                    | 7                 | SPE-LC-MS/MS   | NA                            | 100                           | 1415                                          | 5610                                          | [121]     |
|                | Spain    | NA        | NA/5                    | 5                 | SPE-UPLC-MS/MS | 0.6/2.0                       | 80                            | 148.4                                         | 286                                           | [94]      |
|                | Taiwan   | 2007/2008 | GS/15                   | 15                | SPE-LC-MS/MS   | 1.0/NA                        | 91                            | NA                                            | 122                                           | [122]     |
|                | UK       | NA        | NA                      | NA                | NA             | NA                            | NA                            | NA                                            | 790                                           | [117]     |
|                | USA      | 1999/2000 | CS/NA                   | 84                | SPE-UPLC-MS/MS | 15/NA                         | 3.6                           | 48                                            | 790                                           | [116]     |
|                | USA      | 2001      | NA/74                   | 74                | SPE-LC-MS/MS   | 15/NA                         | 0                             | ND                                            | ND                                            | [104]     |



| Pharmaceutical       | Country    | Year      | Sampling type/locations | Number of samples | Method          | LOD/LOQ (ng L <sup>-1</sup> ) | Frequency (highest value) (%) | Average (highest value) (ng L <sup>-1</sup> ) | Maximum (highest value) (ng L <sup>-1</sup> ) | Reference |
|----------------------|------------|-----------|-------------------------|-------------------|-----------------|-------------------------------|-------------------------------|-----------------------------------------------|-----------------------------------------------|-----------|
|                      | USA        | 2006/2007 | GS/19                   | 32                | SPE-GC/LC-MS/MS | 0.25/NA                       | 58                            | 2.2                                           | 24                                            | [127]     |
|                      | USA        | 2008/2009 | GS/7                    | 42                | SPE-LC-MS/MS    | 1.6/4.8                       | 0                             | ND                                            | ND                                            | [106]     |
|                      | USA        | 2014/2015 | GS/2                    | 12                | SPE-UPLC-MS/MS  | NA                            | NA                            | 15.90                                         | 190.80                                        | [74]      |
|                      | USA        | 2016      | GS/72                   | 72                | SPE-UPLC-MS/MS  | 1.30/NA                       | 56.8                          | 21.2                                          | 1440.4                                        | [128]     |
|                      |            |           |                         |                   |                 |                               | 50.8(100)                     | 154.7(1420.0)                                 | 1443.0(17 036)                                |           |
| Simvastatin (SIM)    | Canada     | 2002      | NA/1                    | 3                 | SPE-LC-MS/MS    | 0.1/NA                        | 0                             | ND                                            | ND                                            | [49]      |
|                      | Malaysia   | 2013      | GS/3                    | 6                 | SPE-LC-MS/MS    | NA/2                          | 33                            | 6                                             | 6                                             | [50]      |
|                      | Portugal   | 2009      | GS/6                    | 12                | SPE-LC-MS/MS    | 3/10                          | 8                             | 42.9                                          | 42.9                                          | [90]      |
|                      | Portugal   | 2016      | GS/31                   | 31                | UHPLC-TOF-MS    | NA/NA                         | 0.0                           | 0.0                                           | 0.0                                           | [91]      |
|                      | UK         | 2007      | GS/2                    | 40                | SPE-LC-MS/MS    | NA                            | 0                             | ND                                            | ND                                            | [35]      |
|                      | UK         | NA        | NA                      | NA                | NA              | NA                            | 0                             | ND                                            | ND                                            | [43]      |
|                      |            |           |                         |                   |                 |                               | 6.8(33.0)                     | 8.2(42.9)                                     | 8.2(42.9)                                     |           |
| Total                |            |           |                         |                   |                 |                               | 51.1(100)                     | 152.3(1420.0)                                 | 1402.5(17 036)                                |           |
| <b>Antiepileptic</b> |            |           |                         |                   |                 |                               |                               |                                               |                                               |           |
| Carbamazepine (CAR)  | America    | NA        | NA                      | NA                | NA              | NA                            | NA                            | NA                                            | 735                                           | [75]      |
|                      | Asia       | NA        | NA                      | NA                | NA              | NA                            | NA                            | NA                                            | 120                                           | [75]      |
|                      | Bangladesh | 2017      | GS/20                   | 20                | SPE-LC-MS/MS    | 0.01/0.02                     | 65.0                          | 1.51                                          | 8.8                                           | [129]     |
|                      | Canada     | 2006/2007 | GS/17                   | 125               | SPE-LC-MS/MS    | NA/1                          | 50                            | 3                                             | 749                                           | [113]     |

| Pharmaceutical | Country        | Year      | Sampling type/locations | Number of samples | Method       | LOD/LOQ (ng L <sup>-1</sup> ) | Frequency (highest value) (%) | Average (highest value) (ng L <sup>-1</sup> ) | Maximum (highest value) (ng L <sup>-1</sup> ) | Reference |
|----------------|----------------|-----------|-------------------------|-------------------|--------------|-------------------------------|-------------------------------|-----------------------------------------------|-----------------------------------------------|-----------|
|                | China          | 2012/2013 | GS/20                   | 20                | SPE-LC-MS/MS | NA/NA                         | 60                            | 0.9                                           | 50                                            | [108]     |
|                | China          | 2013      | GS/19                   | 57                | SPE-LC-MS/MS | 0.02/NA                       | 79                            | 0.6                                           | 24.5                                          | [126]     |
|                | China          | 2014      | GS/12                   | 12                | SPE-LC-MS/MS | NA/3.0                        | 100                           | 25.3                                          | 75.5                                          | [4]       |
|                | Europe         | NA        | NA                      | NA                | NA           | NA                            | NA                            | NA                                            | 366                                           | [75]      |
|                | France         | 2007/2008 | GS/8                    | 24                | SPE-LC-MS/MS | NA/1                          | 88                            | NA                                            | 41.6                                          | [92]      |
|                | Germany        | 2007      | TP/2                    | 36                | SPE-LC-MS/MS | NA                            | NA                            | 400                                           | 730                                           | [123]     |
|                | Germany        | NA        | NA                      | NA                | NA           | NA                            | NA                            | NA                                            | 1194                                          | [33]      |
|                | Germany/Canada | NA        | NA                      | NA                | NA           | NA                            | NA                            | NA                                            | 1300                                          | [117]     |
|                | International  | NA        | NA                      | NA                | NA           | NA                            | 85                            | 174                                           | 11 561                                        | [100]     |
|                | Italy          | 2011      | CS/2                    | 6                 | SPE-LC-MS/MS | NA                            | NA                            | NA                                            | 80                                            | [71]      |
|                | Italy          | NA        | CP/1                    | 4                 | SPE-LC-MS/MS | 1/NA                          | NA                            | 7                                             | NA                                            | [17]      |
|                | Japan          | 2006/2010 | GS/8                    | 27                | SPE-LC-MS/MS | NA/0.4                        | 48.1                          | 22.2                                          | 100                                           | [118]     |
|                | Kenya          | 2012/2013 | GS/3                    | 14                | SPE-LC-MS    | NA/NA                         | 85.71                         | 204.28                                        | 430                                           | [26]      |
|                | Korea          | 2004/2005 | GS/3                    | 8                 | SPE-LC-MS/MS | NA                            | 88                            | 25                                            | 61                                            | [79]      |
|                | Korea          | 2006      | NA/5                    | 5                 | SPE-LC-MS/MS | 1/4                           | 80                            | 200                                           | 595                                           | [110]     |
|                | Korea          | 2007      | GS/5                    | 5                 | SPE-LC-MS/MS | NA                            | NA                            | NA                                            | 100                                           | [27]      |
|                | Korea          | 2016      | GS/18                   | 72                | SPE-LC-MS/MS | NA/4.6                        | 97.2                          | 206.7                                         | 899.9                                         | [111]     |
|                | Malaysia       | 2013      | GS/2                    | 6                 | SPE-LC-MS/MS | NA/1.6                        | 67                            | 15                                            | 24                                            | [50]      |

| Pharmaceutical | Country      | Year      | Sampling type/locations | Number of samples | Method          | LOD/LOQ (ng L <sup>-1</sup> ) | Frequency (highest value) (%) | Average (highest value) (ng L <sup>-1</sup> ) | Maximum (highest value) (ng L <sup>-1</sup> ) | Reference |
|----------------|--------------|-----------|-------------------------|-------------------|-----------------|-------------------------------|-------------------------------|-----------------------------------------------|-----------------------------------------------|-----------|
|                | Mexico       | 2015/2016 | TP/4                    | 16                | SPE-LC-MS/MS    | 0.8/2.6                       | 100                           | 56.3                                          | 276                                           | [41]      |
|                | Netherlands  | 2002      | NA                      | 263               | NA              | NA                            | NA                            | NA                                            | 227                                           | [130]     |
|                | Netherlands  | 2009      | GS/14                   | 14                | SPE-LC-MS/MS    | NA                            | 86                            | 59                                            | 121                                           | [119]     |
|                | Portugal     | 2007/2008 | GS/11                   | 87                | SPE-LC-MS/MS    | 0.03/0.4                      | 100                           | NA                                            | 178                                           | [131]     |
|                | Portugal     | 2013      | GS/NA                   | NA                | SPE-UPLC-MS/MS  | NA/NA                         | NA                            | NA                                            | 17                                            | [112]     |
|                | Portugal     | 2013/2014 | GS/5                    | 55                | SPE-UHPLC-MS/MS | 0.04/0.12                     | 100                           | 31.7                                          | 214                                           | [20]      |
|                | Portugal     | 2016      | GS/31                   | 31                | UHPLC-TOF-MS    | NA/NA                         | 0.0                           | 0.0                                           | 0.0                                           | [91]      |
|                | Serbia       | NA        | GS/14                   | 14                | SPE-LC-MS/MS    | 0.27/0.90                     | 93                            | 56                                            | 130                                           | [72]      |
|                | South Africa | 2013      | GS/12                   | 12                | SPE-LC-MS/MS    | 89/297                        | 100                           | 428                                           | 1650                                          | [34]      |
|                | Spain        | 2005/2006 | NA/7                    | 21                | SPE-LC-MS/MS    | 2/NA                          | 90                            | 1070                                          | 3090                                          | [103]     |
|                | Spain        | 2006      | GS/8                    | 16                | SPE-LC-MS/MS    | NA                            | 100                           | 64.0                                          | 178.7                                         | [120]     |
|                | Spain        | 2010      | NA/10                   | 10                | TF-LC-MS/MS     | 0.1/0.5                       | NA                            | NA                                            | 90.4                                          | [93]      |
|                | Spain        | 2016/2017 | GS/23                   | 321               | SPE-LC-MS/MS    | NA/0.3                        | 50.8                          | 4.3                                           | 93                                            | [78]      |
|                | Spain        | NA        | NA/10                   | 10                | SPE-LC-MS/MS    | 2/10                          | NA                            | 30                                            | 110                                           | [14]      |
|                | Spain        | NA        | NA/7                    | 7                 | SPE-LC-MS/MS    | NA                            | 100                           | 965                                           | 2680                                          | [121]     |
|                | Spain        | NA        | NA/5                    | 5                 | SPE-UPLC-MS/MS  | 0.2/0.8                       | 80                            | 19.7                                          | 38.6                                          | [94]      |

| Pharmaceutical                                  | Country                      | Year      | Sampling type/locations | Number of samples | Method          | LOD/LOQ (ng L <sup>-1</sup> ) | Frequency (highest value) (%) | Average (highest value) (ng L <sup>-1</sup> ) | Maximum (highest value) (ng L <sup>-1</sup> ) | Reference |
|-------------------------------------------------|------------------------------|-----------|-------------------------|-------------------|-----------------|-------------------------------|-------------------------------|-----------------------------------------------|-----------------------------------------------|-----------|
|                                                 | Sweden                       | 2007/2008 | GS/3                    | 30                | SPE-LC-MS/MS    | NA                            | 100                           | 110                                           | NA                                            | [86]      |
|                                                 | Sweden                       | 2014      | TP/8                    | 8                 | SPE-UPLC-MS/MS  | NA/0.04                       | 100                           | 88.1                                          | 310                                           | [124]     |
|                                                 | UK                           | 2007      | GS/2                    | 40                | SPE-LC-MS/MS    | NA                            | 95                            | 133                                           | 647                                           | [35]      |
|                                                 | UK                           | NA        | NA                      | NA                | NA              | NA                            | NA                            | NA                                            | 684                                           | [43]      |
|                                                 | USA                          | 2006/2007 | GS/19                   | 32                | SPE-GC/LC-MS/MS | 0.25/NA                       | 63                            | 2.3                                           | 36                                            | [127]     |
|                                                 | USA                          | 2008/2009 | GS/7                    | 42                | SPE-LC-MS/MS    | 2.7/8.2                       | 21.4                          | 14.9                                          | 38.2                                          | [106]     |
|                                                 | USA                          | 2012/2013 | GS/4                    | 28                | SPE-UPLC-MS/MS  | 0.03/NA                       | 7                             | 0.10                                          | 0.17                                          | [87]      |
|                                                 | USA                          | 2014/2015 | GS/2                    | 12                | SPE-UPLC-MS/MS  | NA                            | NA                            | 2.04                                          | 2.96                                          | [74]      |
|                                                 | USA                          | 2016      | GS/72                   | 72                | SPE-UPLC-MS/MS  | 0.07/NA                       | 100                           | 6.1                                           | 542.6                                         | [128]     |
|                                                 |                              |           |                         |                   |                 |                               | 77.5(100)                     | 130.2(1070.0)                                 | 680.0(11 561)                                 |           |
| Selective serotonin reuptake inhibitors (SSRIs) |                              |           |                         |                   |                 |                               |                               |                                               |                                               |           |
| Citalopram (CIT)                                | Canada                       | 2007      | FP/1                    | 4                 | SPE-LC-MS/MS    | 0.077/NA                      | 100                           | 4.6                                           | 11.5                                          | [55]      |
|                                                 | India (near drug facilities) | 2008      | GS/11                   | NA                | SPE-LC-MS       | NA/10                         | NA                            | NA                                            | 76 000                                        | [77]      |
|                                                 | International                | NA        | NA                      | NA                | NA              | NA                            | 100                           | 20                                            | 219                                           | [100]     |
|                                                 | Portugal                     | 2013/2014 | GS/5                    | 55                | SPE-UHPLC-MS/MS | 0.08/0.24                     | 10.9                          | 0.86                                          | 28.9                                          | [20]      |
|                                                 | Spain                        | NA        | NA/5                    | 5                 | SPE-UPLC-MS/MS  | 0.3/1.1                       | 20                            | 0.9                                           | 4.7                                           | [94]      |

| Pharmaceutical   | Country       | Year      | Sampling type/locations | Number of samples | Method          | LOD/LOQ (ng L <sup>-1</sup> ) | Frequency (highest value) (%) | Average (highest value) (ng L <sup>-1</sup> ) | Maximum (highest value) (ng L <sup>-1</sup> ) | Reference |
|------------------|---------------|-----------|-------------------------|-------------------|-----------------|-------------------------------|-------------------------------|-----------------------------------------------|-----------------------------------------------|-----------|
|                  |               |           |                         |                   |                 |                               | 57.7(100)                     | 6.6(20.0)                                     | 15 252.8(76 000)                              |           |
| Fluoxetine (FLU) | Canada        | 2007      | FP/1                    | 4                 | SPE-LC-MS/MS    | 0.050/NA                      | 100                           | 0.9                                           | 1.3                                           | [55]      |
|                  | China         | 2013      | GS/19                   | 57                | SPE-LC-MS/MS    | 0.04/NA                       | 0                             | ND                                            | ND                                            | [126]     |
|                  | China         | 2014      | GS/12                   | 12                | SPE-LC-MS/MS    | NA/0.3                        | 100                           | 0.4                                           | 1.3                                           | [4]       |
|                  | England       | NA        | GS/7                    | 69                | SPE-LC-MS/MS    | NA                            | 9                             | 7.6                                           | 13.5                                          | [43]      |
|                  | France        | 2007/2008 | GS/8                    | 24                | SPE-LC-MS/MS    | NA/85                         | 0                             | ND                                            | ND                                            | [92]      |
|                  | International | NA        | NA                      | NA                | NA              | NA                            | 29.2                          | 18                                            | 596                                           | [100]     |
|                  | Korea         | 2004/2005 | GS/3                    | 8                 | SPE-LC-MS/MS    | NA                            | 0                             | ND                                            | ND                                            | [79]      |
|                  | NA            | NA        | NA                      | NA                | NA              | NA                            | NA                            | NA                                            | 30                                            | [85]      |
|                  | Portugal      | 2009      | GS/6                    | 12                | SPE-LC-MS/MS    | 6/20                          | 0                             | ND                                            | ND                                            | [90]      |
|                  | Portugal      | 2013/2014 | GS/5                    | 55                | SPE-UHPLC-MS/MS | 0.02/0.08                     | 100                           | 3.25                                          | 19.5                                          | [20]      |
|                  | Portugal      | 2016      | GS/31                   | 31                | UHPLC-TOF-MS    | NA/NA                         | 22.6                          | 9.9                                           | 16.2                                          | [91]      |
|                  | Spain         | 2005/2006 | NA/7                    | 21                | SPE-LC-MS/MS    | 20/NA                         | 0                             | ND                                            | ND                                            | [103]     |
|                  | Spain         | 2006      | GS/8                    | 16                | SPE-LC-MS/MS    | NA                            | 7                             | 4.2                                           | 4.2                                           | [120]     |
|                  | Spain         | 2010      | NA/10                   | 10                | TF-LC-MS/MS     | 3.7/12.5                      | NA                            | NA                                            | 14.5                                          | [93]      |
| Spain            | NA            | NA/10     | 10                      | SPE-LC-MS/MS      | 20/66           | NA                            | ND                            | ND                                            | [14]                                          |           |
| Spain            | NA            | NA/5      | 5                       | SPE-UPLC-MS/MS    | 0.8/2.6         | 0                             | ND                            | ND                                            | [94]                                          |           |

| Pharmaceutical          | Country  | Year      | Sampling type/locations | Number of samples | Method          | LOD/LOQ (ng L <sup>-1</sup> ) | Frequency (highest value) (%) | Average (highest value) (ng L <sup>-1</sup> ) | Maximum (highest value) (ng L <sup>-1</sup> ) | Reference |
|-------------------------|----------|-----------|-------------------------|-------------------|-----------------|-------------------------------|-------------------------------|-----------------------------------------------|-----------------------------------------------|-----------|
|                         | UK       | NA        | NA                      | NA                | NA              | NA                            | NA                            | NA                                            | 14                                            | [36]      |
|                         | USA      | 1999/2000 | CS/NA                   | 84                | SPE-UPLC-MS/MS  | 18/NA                         | 1.2                           | 12                                            | 12                                            | [116]     |
|                         | USA      | 2001      | NA/74                   | 74                | SPE-LC-MS/MS    | 18/NA                         | 1.4                           | NA                                            | <LOQ                                          | [104]     |
|                         | USA      | 2006/2007 | GS/19                   | 32                | SPE-GC/LC-MS/MS | 0.50/NA                       | 16                            | 0.8                                           | 3                                             | [127]     |
|                         | USA      | 2008/2009 | GS/7                    | 42                | SPE-LC-MS/MS    | 3.5/10.5                      | 9.5                           | 23.2                                          | 91.6                                          | [106]     |
|                         | USA      | 2014/2015 | GS/2                    | 12                | SPE-UPLC-MS/MS  | NA                            | NA                            | 1.44                                          | 17.31                                         | [74]      |
|                         |          |           |                         |                   |                 |                               | 23.3(100)                     | 4.5(23.2)                                     | 37.9(596.0)                                   |           |
| Norfluoxetine (Nor-FLU) | Canada   | 2007      | FP/1                    | 4                 | NA              | NA                            | 30                            | 1.3                                           | 1.3                                           | [55]      |
|                         | England  | NA        | GS/7                    | 69                | 0               | ND                            | ND                            | 1.9                                           | 3.5                                           | [43]      |
|                         | France   | 2007/2008 | GS/8                    | 24                | 7               | 4.2                           | 4.2                           | ND                                            | ND                                            | [92]      |
|                         | Portugal | 2013/2014 | GS/5                    | 55                | SPE-UHPLC-MS/MS | 0.22/0.64                     | 0                             | 0                                             | 0                                             | [20]      |
|                         | UK       | NA        | NA                      | NA                | NA              | NA                            | 14.5                          | NA                                            | 3.5                                           | [36]      |
|                         | USA      | 2006/2007 | GS/19                   | 32                | 0               | ND                            | ND                            | ND                                            | ND                                            | [127]     |
|                         |          |           |                         |                   |                 |                               | 8.1(30)                       | 0.6(1.9)                                      | 1.4(3.5)                                      |           |
| Paroxetine (PAR)        | Canada   | 2007      | FP/1                    | 4                 | SPE-LC-MS/MS    | 0.096/NA                      | 100                           | 2.2                                           | 3.0                                           | [55]      |
|                         | Japan    | 2006/2010 | GS/8                    | 27                | SPE-LC-MS/MS    | NA/8.0                        | 0                             | ND                                            | ND                                            | [118]     |
|                         | Portugal | 2009      | GS/6                    | 12                | SPE-LC-MS/MS    | 3/10                          | 0                             | ND                                            | ND                                            | [90]      |

| Pharmaceutical                | Country  | Year      | Sampling type/locations | Number of samples | Method          | LOD/LOQ (ng L <sup>-1</sup> ) | Frequency (highest value) (%) | Average (highest value) (ng L <sup>-1</sup> ) | Maximum (highest value) (ng L <sup>-1</sup> ) | Reference |
|-------------------------------|----------|-----------|-------------------------|-------------------|-----------------|-------------------------------|-------------------------------|-----------------------------------------------|-----------------------------------------------|-----------|
|                               | Portugal | 2013/2014 | GS/5                    | 55                | SPE-UHPLC-MS/MS | 6.40/19.4                     | 5.45                          | 25.5                                          | 25.6                                          | [20]      |
|                               | Spain    | 2005/2006 | NA/7                    | 21                | SPE-LC-MS/MS    | 8/NA                          | 0                             | ND                                            | ND                                            | [103]     |
|                               | Spain    | 2006      | GS/8                    | 16                | SPE-LC-MS/MS    | NA                            | 0                             | ND                                            | ND                                            | [120]     |
|                               | Spain    | 2010      | NA/10                   | 10                | TF-LC-MS/MS     | 4.6/15.2                      | NA                            | NA                                            | 7.8                                           | [93]      |
|                               | Spain    | NA        | NA/10                   | 10                | SPE-LC-MS/MS    | 8/20                          | NA                            | ND                                            | ND                                            | [14]      |
|                               | Spain    | NA        | NA/5                    | 5                 | SPE-UPLC-MS/MS  | 0.6/2.0                       | 0                             | ND                                            | ND                                            | [94]      |
|                               | USA      | 2014/2015 | GS/2                    | 12                | SPE-UPLC-MS/MS  | NA                            | NA                            | 0.64                                          | 2.48                                          | [74]      |
|                               |          |           |                         |                   |                 |                               | 15.1(100)                     | 3.1(25.5)                                     | 3.9(25.6)                                     |           |
| Sertraline (SER)              | Canada   | 2007      | FP/1                    | 4                 | SPE-LC-MS/MS    | 0.048/NA                      | 100                           | 1.6                                           | 2.4                                           | [55]      |
|                               | Portugal | 2013/2014 | GS/5                    | 55                | SPE-UHPLC-MS/MS | 0.02/0.06                     | 27.3                          | 0.01                                          | NA                                            | [20]      |
|                               | Portugal | 2016      | GS/31                   | 31                | UHPLC-TOF-MS    | NA/NA                         | 6.5                           | 202                                           | 304                                           | [91]      |
|                               | Spain    | NA        | NA/5                    | 5                 | SPE-UPLC-MS/MS  | 1.7/5.7                       | 0                             | ND                                            | ND                                            | [94]      |
|                               |          |           |                         |                   |                 |                               | 33.5(100)                     | 67.9(202)                                     | 102.1(304)                                    |           |
| Desmethylsertraline (Nor-SER) | Canada   | 2007      | FP/1                    | 4                 | SPE-LC-MS/MS    | 0.072/NA                      | 100                           | 2.3                                           | 4.5                                           | [55]      |
|                               |          |           |                         |                   |                 |                               | 100.0(100)                    | 2.3(2.3)                                      | 4.5(4.5)                                      |           |
| Total                         |          |           |                         |                   |                 |                               | 26.0(100)                     | 8.6(202.0)                                    | 1648.0(76 000)                                |           |

| Pharmaceutical           | Country       | Year      | Sampling type/locations | Number of samples | Method       | LOD/LOQ (ng L <sup>-1</sup> ) | Frequency (highest value) (%) | Average (highest value) (ng L <sup>-1</sup> ) | Maximum (highest value) (ng L <sup>-1</sup> ) | Reference |
|--------------------------|---------------|-----------|-------------------------|-------------------|--------------|-------------------------------|-------------------------------|-----------------------------------------------|-----------------------------------------------|-----------|
| <i>Anti-inflammatory</i> |               |           |                         |                   |              |                               |                               |                                               |                                               |           |
| Diclofenac (DIC)         | Asia          | NA        | NA                      | NA                | NA           | NA                            | NA                            | NA                                            | 62                                            | [75]      |
|                          | Brazil        | 1996      | TP/17                   | 17                | SPE-GC-MS    | 10/NA                         | NA                            | 20                                            | 450                                           | [38]      |
|                          | Canada        | 2005      | GS/2                    | 8                 | SPE-GC-MS    | 1.0/NA                        | 0                             | ND                                            | ND                                            | [83]      |
|                          | Canada        | 2006/2007 | GS/17                   | 125               | SPE-LC-MS/MS | NA                            | 0                             | ND                                            | ND                                            | [113]     |
|                          | China         | 2007      | GS/14                   | 14                | SPE-GC-MS    | 1.1/4.4                       | 79                            | 51.2                                          | 147                                           | [125]     |
|                          | China         | 2012/2013 | GS/20                   | 20                | SPE-LC-MS/MS | NA/NA                         | 0                             | ND                                            | ND                                            | [108]     |
|                          | China         | 2013      | GS/19                   | 57                | SPE-LC-MS/MS | 0.18/NA                       | 100                           | 12.9                                          | 58.4                                          | [126]     |
|                          | China         | NA        | NA                      | NA                | NA           | NA                            | NA                            | NA                                            | 7.7                                           | [96]      |
|                          | Europe        | NA        | NA                      | NA                | NA           | NA                            | NA                            | NA                                            | 794                                           | [75]      |
|                          | France        | 2007/2008 | GS/8                    | 24                | SPE-LC-MS/MS | NA/1                          | 75                            | NA                                            | 35.0                                          | [92]      |
|                          | Germany       | 2002      | GS/7                    | 7                 | SPE-GC-MS    | 0.08/NA                       | 100                           | 38.4                                          | 67                                            | [132]     |
|                          | Germany       | 2007      | TP/2                    | 36                | SPE-LC-MS/MS | NA/45                         | NA                            | 410                                           | 1400                                          | [123]     |
|                          | Germany       | NA        | NA                      | NA                | NA           | NA                            | NA                            | NA                                            | 14 000                                        | [117]     |
|                          | Greece        | NA        | NA                      | NA                | NA           | NA                            | NA                            | NA                                            | 1043                                          | [33]      |
|                          | International | NA        | NA                      | NA                | NA           | NA                            | 75.5                          | 137                                           | 18 740                                        | [100]     |
| Italy                    | 2011          | CS/2      | 6                       | SPE-LC-MS/MS      | NA           | NA                            | NA                            | 60                                            | [71]                                          |           |
| Japan                    | 2006/2010     | GS/8      | 27                      | SPE-LC-MS/MS      | NA/2.5       | 3.7                           | 44.0                          | 44.0                                          | [118]                                         |           |
| Kenya                    | 2012/2013     | GS/3      | 14                      | SPE-LC-MS         | NA/NA        | 78.57                         | 277.85                        | 730                                           | [26]                                          |           |



| Pharmaceutical | Country      | Year      | Sampling type/locations | Number of samples | Method          | LOD/LOQ (ng L <sup>-1</sup> ) | Frequency (highest value) (%) | Average (highest value) (ng L <sup>-1</sup> ) | Maximum (highest value) (ng L <sup>-1</sup> ) | Reference |
|----------------|--------------|-----------|-------------------------|-------------------|-----------------|-------------------------------|-------------------------------|-----------------------------------------------|-----------------------------------------------|-----------|
|                | Korea        | 2004/2005 | GS/3                    | 8                 | SPE-LC-MS/MS    | NA                            | 38                            | 3.0                                           | 6.8                                           | [79]      |
|                | Korea        | 2007      | GS/5                    | 5                 | SPE-LC-MS/MS    | NA                            | 0                             | ND                                            | ND                                            | [27]      |
|                | Luxembourg   | 2007/2008 | TP/1                    | 24                | SPE-LC-MS/MS    | 0.3/1.0                       | NA                            | NA                                            | 55                                            | [60]      |
|                | Malaysia     | 2013      | GS/2                    | 6                 | SPE-LC-MS/MS    | NA/12                         | 50                            | 39                                            | 54                                            | [50]      |
|                | Mexico       | 2015/2016 | TP/4                    | 16                | SPE-LC-MS/MS    | 1.2/4.1                       | 100                           | 740                                           | 1398                                          | [41]      |
|                | NA           | NA        | NA                      | NA                | NA              | NA                            | NA                            | NA                                            | 1800                                          | [85]      |
|                | Portugal     | 2009      | GS/6                    | 12                | SPE-LC-MS/MS    | 5/17                          | 17                            | 39.8                                          | 56.8                                          | [90]      |
|                | Portugal     | 2013      | GS/NA                   | NA                | SPE-UPLC-MS/MS  | NA/NA                         | NA                            | NA                                            | 1                                             | [112]     |
|                | Portugal     | 2013/2014 | GS/5                    | 55                | SPE-UHPLC-MS/MS | 0.10/0.30                     | 1.82                          | 38                                            | 38                                            | [20]      |
|                | Portugal     | 2016      | GS/31                   | 31                | UHPLC-TOF-MS    | NA/NA                         | 32.3                          | 14.8                                          | 51.8                                          | [91]      |
|                | Scotland     | 2005/2006 | GS/4                    | 40                | SPE-LC-MS/MS    | 0.2/0.6                       | 17.5                          | 0.14                                          | 1.9                                           | [80]      |
|                | Serbia       | NA        | GS/14                   | 14                | SPE-LC-MS/MS    | 0.15/0.49                     | 0                             | ND                                            | ND                                            | [72]      |
|                | South Africa | 2015/2016 | TP/7                    | 38                | SPE-GC-MS       | 484/1614                      | NA                            | NA                                            | 10200                                         | [133]     |
|                | Spain        | 2005/2006 | NA/7                    | 21                | SPE-LC-MS/MS    | 2/NA                          | 100                           | 2200                                          | 18 740                                        | [103]     |
|                | Spain        | 2006      | GS/8                    | 16                | SPE-LC-MS/MS    | NA                            | 100                           | 87.7                                          | 358.1                                         | [120]     |
|                | Spain        | 2010      | NA/10                   | 10                | TF-LC-MS/MS     | 10.2/34.0                     | NA                            | NA                                            | 260                                           | [93]      |

| Pharmaceutical                 | Country               | Year      | Sampling type/locations | Number of samples | Method          | LOD/LOQ (ng L <sup>-1</sup> ) | Frequency (highest value) (%) | Average (highest value) (ng L <sup>-1</sup> ) | Maximum (highest value) (ng L <sup>-1</sup> ) | Reference |
|--------------------------------|-----------------------|-----------|-------------------------|-------------------|-----------------|-------------------------------|-------------------------------|-----------------------------------------------|-----------------------------------------------|-----------|
|                                | Spain                 | 2012      | GS/22                   | 22                | SPE-UPLC-MS/MS  | NA/3.9                        | 50                            | 49                                            | 865                                           | [42]      |
|                                | Spain                 | 2016/2017 | GS/23                   | 321               | SPE-LC-MS/MS    | NA/0.3                        | 45.3                          | 23.8                                          | 650                                           | [78]      |
|                                | Spain                 | NA        | NA/10                   | 10                | SPE-LC-MS/MS    | 2/5                           | NA                            | 29                                            | 60                                            | [14]      |
|                                | Spain                 | NA        | NA/7                    | 7                 | SPE-LC-MS/MS    | NA                            | 100                           | 2204                                          | 11 200                                        | [121]     |
|                                | Spain                 | NA        | 5                       | 5                 | SPE-UPLC-MS/MS  | 1.4/4.6                       | 60                            | 14.9                                          | 29.1                                          | [94]      |
|                                | Spain/Belgium/Germany | NA        | TP/NA                   | 16                | SPE-GC/LC-MS/MS | 7/20                          | NA                            | NA                                            | 72                                            | [62]      |
|                                | Sweden                | 2014      | TP/8                    | 8                 | SPE-UPLC-MS/MS  | NA/0.04                       | 100                           | 126.4                                         | 490                                           | [124]     |
|                                | UK                    | 2007      | GS/2                    | 40                | SPE-LC-MS/MS    | NA                            | 96                            | 29                                            | 261                                           | [35]      |
|                                | UK                    | NA        | NA                      | NA                | NA              | NA                            | NA                            | NA                                            | 568                                           | [36]      |
|                                | USA                   | 2006/2007 | GS/19                   | 32                | SPE-GC/LC-MS/MS | 0.25/NA                       | 21                            | 1.1                                           | 1.2                                           | [127]     |
|                                |                       |           |                         |                   |                 |                               | 51.5(100)                     | 221.0(2204.0)                                 | 1928.5(18 740)                                |           |
| 4-hydroxydiclofenac (4-OH-DIC) | Spain                 | 2010      | NA/10                   | 10                | TF-LC-MS/MS     | 0.3/0.9                       | NA                            | NA                                            | 39.8                                          | [93]      |
|                                | Sweden                | 2014      | TP/8                    | 8                 | SPE-UPLC-MS/MS  | NA/0.04                       | 0                             | ND                                            | ND                                            | [124]     |
|                                |                       |           |                         |                   |                 |                               | 0                             | 0                                             | 19.9(39.8)                                    |           |
| Ibuprofen (IBU)                | America               | NA        | NA                      | NA                | NA              | NA                            | NA                            | NA                                            | 203                                           | [75]      |
|                                | Asia                  | NA        | NA                      | NA                | NA              | NA                            | NA                            | NA                                            | 30                                            | [75]      |
|                                | Brazil                | 1996      | TP/17                   | 17                | SPE-GC-MS       | 10/NA                         | NA                            | NA                                            | 190                                           | [38]      |

| Pharmaceutical | Country       | Year      | Sampling type/locations | Number of samples | Method       | LOD/LOQ (ng L <sup>-1</sup> ) | Frequency (highest value) (%) | Average (highest value) (ng L <sup>-1</sup> ) | Maximum (highest value) (ng L <sup>-1</sup> ) | Reference |
|----------------|---------------|-----------|-------------------------|-------------------|--------------|-------------------------------|-------------------------------|-----------------------------------------------|-----------------------------------------------|-----------|
|                | Canada        | 2005      | GS/2                    | 8                 | SPE-GC-MS    | 0.8/NA                        | 22.2                          | 7.7                                           | 9.5                                           | [83]      |
|                | Canada        | 2006/2007 | GS/17                   | 125               | SPE-LC-MS/MS | NA/0.5                        | 21                            | 0.98                                          | 79                                            | [113]     |
|                | Canada        | 2010      | GS/9                    | 9                 | SPE-GC-MS/MS | 7/NA                          | 0                             | ND                                            | ND                                            | [88]      |
|                | China         | 2007      | GS/14                   | 14                | SPE-GC-MS    | 0.7/2.2                       | 86                            | 129                                           | 490                                           | [125]     |
|                | China         | 2012/2013 | GS/20                   | 20                | SPE-LC-MS/MS | NA/NA                         | 10                            | 9.1                                           | 99.3                                          | [108]     |
|                | China         | 2013      | GS/19                   | 57                | SPE-LC-MS/MS | 0.10/NA                       | 100                           | 12.6                                          | 242                                           | [126]     |
|                | China         | NA        | NA                      | NA                | NA           | NA                            | NA                            | NA                                            | 685                                           | [96]      |
|                | Costa Rica    | NA        | NA                      | NA                | NA           | NA                            | NA                            | NA                                            | 36 788                                        | [33]      |
|                | Europe        | NA        | NA                      | NA                | NA           | NA                            | NA                            | NA                                            | 468                                           | [75]      |
|                | France        | 2007/2008 | GS/8                    | 24                | SPE-LC-MS/MS | NA/7                          | 63                            | NA                                            | 8.0                                           | [92]      |
|                | Germany       | 2002      | GS/7                    | 7                 | SPE-GC-MS    | 0.05/NA                       | 100                           | 10.5                                          | 32                                            | [132]     |
|                | Germany       | 2007      | TP/2                    | 36                | SPE-LC-MS/MS | NA/8                          | NA                            | 16                                            | 120                                           | [123]     |
|                | International | NA        | NA                      | NA                | NA           | NA                            | 63                            | 504                                           | 31 323                                        | [100]     |
|                | Italy         | 2001      | GS/8                    | 8                 | SPE-LC-MS/MS | 2.2/4.2                       | 63                            | 21.0                                          | 78.5                                          | [109]     |
|                | Japan         | 2006/2010 | GS/8                    | 27                | SPE-LC-MS/MS | NA/1.1                        | 44.4                          | 8.6                                           | 33.0                                          | [118]     |
|                | Kenya         | 2012/2013 | GS/3                    | 14                | SPE-LC-MS    | NA/NA                         | 71.42                         | 3712.1                                        | 17440                                         | [26]      |
|                | Korea         | 2004/2005 | GS/3                    | 8                 | SPE-LC-MS/MS | NA                            | 75                            | 28                                            | 38                                            | [79]      |
|                | Korea         | 2006      | NA/5                    | 5                 | SPE-LC-MS/MS | 5/15                          | 80                            | 260                                           | 414                                           | [110]     |

| Pharmaceutical | Country      | Year      | Sampling type/locations | Number of samples | Method          | LOD/LOQ (ng L <sup>-1</sup> ) | Frequency (highest value) (%) | Average (highest value) (ng L <sup>-1</sup> ) | Maximum (highest value) (ng L <sup>-1</sup> ) | Reference |
|----------------|--------------|-----------|-------------------------|-------------------|-----------------|-------------------------------|-------------------------------|-----------------------------------------------|-----------------------------------------------|-----------|
|                | Korea        | 2007      | GS/5                    | 5                 | SPE-LC-MS/MS    | NA                            | NA                            | NA                                            | 50                                            | [27]      |
|                | Luxembourg   | 2007/2008 | TP/1                    | 24                | SPE-LC-MS/MS    | 0.3/1.0                       | 100                           | NA                                            | 2382                                          | [60]      |
|                | Mexico       | 2015/2016 | TP/4                    | 16                | SPE-LC-MS/MS    | 1.1/3.7                       | NA                            | 520                                           | 1106                                          | [41]      |
|                | NA           | NA        | NA                      | NA                | NA              | NA                            | NA                            | NA                                            | 2700                                          | [85]      |
|                | Portugal     | 2009      | GS/6                    | 12                | SPE-LC-MS/MS    | 50/165                        | 0                             | ND                                            | ND                                            | [90]      |
|                | Portugal     | 2013      | GS/NA                   | NA                | SPE-UPLC-MS/MS  | NA/NA                         | NA                            | NA                                            | 23                                            | [112]     |
|                | Portugal     | 2013/2014 | GS/5                    | 55                | SPE-UHPLC-MS/MS | 4.50/13.6                     | 100                           | 53.7                                          | 1317                                          | [20]      |
|                | Portugal     | 2016      | GS/31                   | 31                | UHPLC-TOF-MS    | NA/NA                         | 6.5                           | NA                                            | NA                                            | [91]      |
|                | Scotland     | 2005/2006 | GS/4                    | 40                | SPE-LC-MS/MS    | 1.0/3.2                       | 2.5                           | 1.3                                           | 1.3                                           | [80]      |
|                | Serbia       | NA        | GS/14                   | 14                | SPE-LC-MS/MS    | 3.28/10.93                    | 0                             | ND                                            | ND                                            | [72]      |
|                | South Africa | 2013      | GS/12                   | 12                | SPE-LC-MS/MS    | 81/271                        | 100                           | 2604                                          | 6200                                          | [34]      |
|                | South Africa | 2015/2016 | TP/7                    | 38                | SPE-GC-MS       | 143/477                       | NA                            | NA                                            | 17600                                         | [133]     |
|                | Spain        | 2005/2006 | NA/7                    | 21                | SPE-LC-MS/MS    | 8/NA                          | 100                           | 1370                                          | 9890                                          | [103]     |
|                | Spain        | 2006      | GS/8                    | 16                | SPE-LC-MS/MS    | NA                            | 100                           | 152.9                                         | 490.4                                         | [120]     |
|                | Spain        | 2011/2012 | NA/1                    | 5                 | SPE-LC-MS/MS    | 0.7/2.4                       | 60                            | 397                                           | 750                                           | [64]      |
|                | Spain        | 2012      | GS/22                   | 22                | SPE-UPLC-MS/MS  | NA/20                         | 82                            | 830                                           | 16 482                                        | [42]      |

| Pharmaceutical | Country               | Year      | Sampling type/locations | Number of samples | Method          | LOD/LOQ (ng L <sup>-1</sup> ) | Frequency (highest value) (%) | Average (highest value) (ng L <sup>-1</sup> ) | Maximum (highest value) (ng L <sup>-1</sup> ) | Reference |
|----------------|-----------------------|-----------|-------------------------|-------------------|-----------------|-------------------------------|-------------------------------|-----------------------------------------------|-----------------------------------------------|-----------|
|                | Spain                 | NA        | NA/10                   | 10                | SPE-LC-MS/MS    | 8/42                          | NA                            | 60                                            | 150                                           | [14]      |
|                | Spain                 | NA        | NA/7                    | 7                 | SPE-LC-MS/MS    | NA                            | 100                           | 1368                                          | 4350                                          | [121]     |
|                | Spain                 | NA        | 5                       | 5                 | SPE-UPLC-MS/MS  | 2.0/6.5                       | 80                            | 113                                           | 193                                           | [94]      |
|                | Spain/Belgium/Germany | NA        | TP/NA                   | 16                | SPE-GC/LC-MS/MS | 12/42                         | NA                            | NA                                            | 152                                           | [62]      |
|                | Sweden                | 2014      | TP/8                    | 8                 | SPE-UPLC-MS/MS  | NA/2.0                        | 0                             | ND                                            | ND                                            | [124]     |
|                | UK                    | 2007      | GS/2                    | 40                | SPE-LC-MS/MS    | NA                            | 93                            | 24                                            | 74                                            | [35]      |
|                | UK                    | NA        | NA                      | NA                | NA              | NA                            | NA                            | NA                                            | 5044                                          | [36]      |
|                | USA                   | 1999/2000 | CS/NA                   | 84                | SPE-UPLC-MS/MS  | 18/NA                         | 9.5                           | 200                                           | 1000                                          | [116]     |
|                | USA                   | 2001      | NA/74                   | 74                | SPE-LC-MS/MS    | 18/NA                         | 1.4                           | NA                                            | 270                                           | [104]     |
|                | USA                   | 2008/2009 | GS/7                    | 42                | SPE-LC-MS/MS    | 4.7/14.0                      | 0                             | ND                                            | ND                                            | [106]     |
|                | USA                   | 2012/2013 | GS/4                    | 28                | SPE-UPLC-MS/MS  | 0.085/NA                      | 4                             | NA                                            | 4.98                                          | [87]      |
|                | USA                   | 2014/2015 | GS/2                    | 12                | SPE-UPLC-MS/MS  | NA                            | NA                            | 0.14                                          | 1.08                                          | [74]      |
|                | USA                   | NA        | NA                      | NA                | NA              | NA                            | NA                            | NA                                            | 1000                                          | [117]     |
|                |                       |           |                         |                   |                 |                               | 52.7(100)                     | 387.9(3712.1)                                 | 3265.3(36 788)                                |           |
| Naproxen (NAP) | America               | NA        | NA                      | NA                | NA              | NA                            | NA                            | NA                                            | 555                                           | [75]      |
|                | Brazil                | 1996      | TP/17                   | 17                | SPE-GC-MS       | 10/NA                         | NA                            | 20                                            | 210                                           | [38]      |
|                | Canada                | 2005      | GS/2                    | 8                 | SPE-GC-MS       | 0.5/NA                        | 22.2                          | 145                                           | 271.4                                         | [83]      |

| Pharmaceutical | Country       | Year      | Sampling type/locations | Number of samples | Method          | LOD/LOQ (ng L <sup>-1</sup> ) | Frequency (highest value) (%) | Average (highest value) (ng L <sup>-1</sup> ) | Maximum (highest value) (ng L <sup>-1</sup> ) | Reference |
|----------------|---------------|-----------|-------------------------|-------------------|-----------------|-------------------------------|-------------------------------|-----------------------------------------------|-----------------------------------------------|-----------|
|                | Canada        | 2006/2007 | GS/17                   | 125               | SPE-LC-MS/MS    | NA/2                          | 21                            | 1                                             | 199                                           | [113]     |
|                | Canada        | 2010      | GS/9                    | 9                 | SPE-GC-MS/MS    | 41/NA                         | NA                            | NA                                            | 45                                            | [88]      |
|                | China         | 2007      | GS/14                   | 14                | SPE-GC-MS       | 1.3/4.2                       | 29                            | 60.2                                          | 118                                           | [125]     |
|                | China         | 2013      | GS/19                   | 57                | SPE-LC-MS/MS    | 0.06/NA                       | 74                            | 0.5                                           | 10.8                                          | [126]     |
|                | China         | NA        | NA                      | NA                | NA              | NA                            | NA                            | NA                                            | 328                                           | [96]      |
|                | Europe        | NA        | NA                      | NA                | NA              | NA                            | NA                            | NA                                            | 80.5                                          | [75]      |
|                | France        | 2007/2008 | GS/8                    | 24                | SPE-LC-MS/MS    | NA/4                          | 46                            | NA                                            | 6.4                                           | [92]      |
|                | Germany       | 2007      | TP/2                    | 36                | SPE-LC-MS/MS    | NA/16                         | NA                            | 34                                            | 830                                           | [123]     |
|                | Greece        | NA        | NA                      | NA                | NA              | NA                            | NA                            | NA                                            | 322                                           | [33]      |
|                | International | NA        | NA                      | NA                | NA              | NA                            | 69                            | 98                                            | 19 600                                        | [100]     |
|                | Italy         | 2011      | CS/2                    | 6                 | SPE-LC-MS/MS    | NA                            | NA                            | NA                                            | 10                                            | [71]      |
|                | Korea         | 2004/2005 | GS/3                    | 8                 | SPE-LC-MS/MS    | NA                            | 75                            | 11                                            | 18                                            | [79]      |
|                | Korea         | 2007      | GS/5                    | 5                 | SPE-LC-MS/MS    | NA                            | NA                            | NA                                            | 12                                            | [27]      |
|                | Mexico        | 2015/2016 | TP/4                    | 16                | SPE-LC-MS/MS    | 0.9/3.1                       | 100                           | 2537.8                                        | 4880                                          | [41]      |
|                | NA            | NA        | NA                      | NA                | NA              | NA                            | NA                            | NA                                            | 390                                           | [85]      |
|                | Portugal      | 2009      | GS/6                    | 12                | SPE-LC-MS/MS    | 14/43                         | 25                            | 34.8                                          | 136                                           | [90]      |
|                | Portugal      | 2013      | GS/NA                   | NA                | SPE-UPLC-MS/MS  | NA/NA                         | NA                            | NA                                            | 6                                             | [112]     |
|                | Portugal      | 2013/2014 | GS/5                    | 55                | SPE-UHPLC-MS/MS | 0.12/0.36                     | 45.5                          | 0.06                                          | 260                                           | [20]      |

| Pharmaceutical | Country               | Year      | Sampling type/locations | Number of samples | Method          | LOD/LOQ (ng L <sup>-1</sup> ) | Frequency (highest value) (%) | Average (highest value) (ng L <sup>-1</sup> ) | Maximum (highest value) (ng L <sup>-1</sup> ) | Reference |
|----------------|-----------------------|-----------|-------------------------|-------------------|-----------------|-------------------------------|-------------------------------|-----------------------------------------------|-----------------------------------------------|-----------|
|                | South Africa          | 2015/2016 | TP/7                    | 38                | SPE-GC-MS       | 75/248                        | NA                            | NA                                            | 59300                                         | [133]     |
|                | Spain                 | 2005/2006 | NA/7                    | 21                | SPE-LC-MS/MS    | 30/NA                         | 55                            | 530                                           | 1810                                          | [103]     |
|                | Spain                 | 2006      | GS/8                    | 16                | SPE-LC-MS/MS    | NA                            | 100                           | 42.6                                          | 105.5                                         | [120]     |
|                | Spain                 | 2010      | NA/10                   | 10                | TF-LC-MS/MS     | 19.0/6.4                      | NA                            | NA                                            | 63.5                                          | [93]      |
|                | Spain                 | 2012      | GS/22                   | 22                | SPE-UPLC-MS/MS  | NA/6                          | 50                            | 278                                           | 1797                                          | [42]      |
|                | Spain                 | NA        | NA/10                   | 10                | SPE-LC-MS/MS    | 7/20                          | NA                            | 33                                            | 50                                            | [14]      |
|                | Spain                 | NA        | NA/7                    | 7                 | SPE-LC-MS/MS    | NA                            | 100                           | 228                                           | 687                                           | [121]     |
|                | Spain/Belgium/Germany | NA        | TP/NA                   | 16                | SPE-GC/LC-MS/MS | 26/75                         | NA                            | NA                                            | 70                                            | [62]      |
|                | Sweden                | 2014      | TP/8                    | 8                 | SPE-UPLC-MS/MS  | NA/1.0                        | 0                             | ND                                            | ND                                            | [124]     |
|                | UK                    | 2007      | GS/2                    | 40                | SPE-LC-MS/MS    | NA                            | 98                            | 32                                            | 146                                           | [35]      |
|                | UK                    | NA        | NA                      | NA                | NA              | NA                            | NA                            | NA                                            | 146                                           | [36]      |
|                | USA                   | 2006/2007 | GS/19                   | 32                | SPE-GC/LC-MS/MS | 0.50/NA                       | 58                            | 0.9                                           | 32                                            | [127]     |
|                | USA                   | 2008/2009 | GS/7                    | 42                | SPE-LC-MS/MS    | 1.0/2.9                       | 23.8                          | 5.0                                           | 30.8                                          | [106]     |
|                | USA                   | 2014/2015 | GS/2                    | 12                | SPE-UPLC-MS/MS  | NA                            | NA                            | 1.82                                          | 6.10                                          | [74]      |
|                | USA                   | NA        | NA                      | NA                | NA              | NA                            | NA                            | NA                                            | 80                                            | [117]     |
|                |                       |           |                         |                   |                 |                               | 55.1(100)                     | 204.7(2537.8)                                 | 2572.6(59 300)                                |           |

| Pharmaceutical     | Country       | Year      | Sampling type/locations | Number of samples | Method         | LOD/LOQ (ng L <sup>-1</sup> ) | Frequency (highest value) (%) | Average (highest value) (ng L <sup>-1</sup> ) | Maximum (highest value) (ng L <sup>-1</sup> ) | Reference |
|--------------------|---------------|-----------|-------------------------|-------------------|----------------|-------------------------------|-------------------------------|-----------------------------------------------|-----------------------------------------------|-----------|
| Paracetamol (PARA) | Canada        | 2006/2007 | GS/17                   | 125               | SPE-LC-MS/MS   | NA/2                          | 11                            | 0.1                                           | 298                                           | [113]     |
|                    | China         | 2012/2013 | GS/20                   | 20                | SPE-LC-MS/MS   | NA/NA                         | 5                             | 4.2                                           | 84.8                                          | [108]     |
|                    | China         | 2013      | GS/19                   | 57                | SPE-LC-MS/MS   | 0.10/NA                       | 96                            | 14.0                                          | 197                                           | [126]     |
|                    | Europe        | NA        | NA                      | NA                | NA             | NA                            | NA                            | NA                                            | 40                                            | [75]      |
|                    | France        | 2007/2008 | GS/8                    | 24                | SPE-LC-MS/MS   | NA/2                          | 100                           | NA                                            | 71.0                                          | [92]      |
|                    | International | NA        | NA                      | NA                | NA             | NA                            | 51.6                          | 148                                           | 15 700                                        | [100]     |
|                    | Japan         | 2006/2010 | GS/8                    | 27                | SPE-LC-MS/MS   | NA/2.8                        | 25.9                          | 19.5                                          | 29.0                                          | [118]     |
|                    | Kenya         | 2012/2013 | GS/3                    | 14                | SPE-LC-MS      | NA/NA                         | 71.42                         | 24 449                                        | 106 970                                       | [26]      |
|                    | Korea         | 2004/2005 | GS/3                    | 8                 | SPE-LC-MS/MS   | NA                            | 75                            | 33                                            | 73                                            | [79]      |
|                    | Korea         | 2007      | GS/5                    | 5                 | SPE-LC-MS/MS   | NA                            | NA                            | NA                                            | 80                                            | [27]      |
|                    | Portugal      | 2009      | GS/6                    | 12                | SPE-LC-MS/MS   | 6/20                          | 50                            | 336                                           | 925                                           | [90]      |
|                    | Portugal      | 2011      | GS/7                    | 7                 | SPE-LC-MS/MS   | 42/141                        | 29                            | 210                                           | 250                                           | [134]     |
|                    | Portugal      | 2013      | GS/NA                   | NA                | SPE-UPLC-MS/MS | NA/NA                         | NA                            | NA                                            | 30                                            | [112]     |
|                    | Portugal      | 2016      | GS/31                   | 31                | UHPLC-TOF-MS   | NA/NA                         | 80.6                          | 1.8                                           | 10.6                                          | [91]      |
|                    | Scotland      | 2005/2006 | GS/4                    | 40                | SPE-LC-MS/MS   | 3.9/13.1                      | 15                            | 7.0                                           | 9.1                                           | [80]      |
|                    | Serbia        | NA        | GS/14                   | 14                | SPE-LC-MS/MS   | 0.27/0.90                     | 29                            | 292                                           | 610                                           | [72]      |
| South Africa       | 2013          | GS/12     | 12                      | SPE-LC-MS/MS      | 2.7/91         | 100                           | 1360                          | 1780                                          | [34]                                          |           |



| Pharmaceutical  | Country  | Year      | Sampling type/locations | Number of samples | Method         | LOD/LOQ (ng L <sup>-1</sup> ) | Frequency (highest value) (%) | Average (highest value) (ng L <sup>-1</sup> ) | Maximum (highest value) (ng L <sup>-1</sup> ) | Reference |
|-----------------|----------|-----------|-------------------------|-------------------|----------------|-------------------------------|-------------------------------|-----------------------------------------------|-----------------------------------------------|-----------|
|                 | Spain    | 2005/2006 | NA/7                    | 21                | SPE-LC-MS/MS   | 17/NA                         | 90                            | 420                                           | 2420                                          | [103]     |
|                 | Spain    | 2006      | GS/8                    | 16                | SPE-LC-MS/MS   | NA                            | 100                           | 34.8                                          | 96.5                                          | [120]     |
|                 | Spain    | 2010      | NA/10                   | 10                | TF-LC-MS/MS    | 14.5/48.3                     | NA                            | NA                                            | 156                                           | [93]      |
|                 | Spain    | NA        | NA/10                   | 10                | SPE-LC-MS/MS   | 17/40                         | NA                            | 42                                            | 250                                           | [14]      |
|                 | Spain    | NA        | NA/7                    | 7                 | SPE-LC-MS/MS   | NA                            | 100                           | 380                                           | 830                                           | [121]     |
|                 | Sweden   | 2014      | TP/8                    | 8                 | SPE-UPLC-MS/MS | NA/0.04                       | 100                           | 40.1                                          | 170                                           | [124]     |
|                 | Taiwan   | 2007/2008 | GS/15                   | 15                | SPE-LC-MS/MS   | 2.0/NA                        | 97                            | NA                                            | 15 700                                        | [122]     |
|                 | UK       | 2007      | GS/2                    | 40                | SPE-LC-MS/MS   | NA                            | 85                            | 483                                           | 1534                                          | [35]      |
|                 | UK       | NA        | NA                      | NA                | NA             | NA                            | NA                            | NA                                            | 2382                                          | [43]      |
|                 | USA      | 1999/2000 | CS/NA                   | 84                | SPE-UPLC-MS/MS | 9/NA                          | 23.8                          | 110                                           | 10 000                                        | [116]     |
|                 | USA      | 2001      | NA/74                   | 74                | SPE-LC-MS/MS   | 9/NA                          | 8.1                           | NA                                            | 160                                           | [104]     |
|                 | USA      | 2008/2009 | GS/7                    | 42                | SPE-LC-MS/MS   | 2.5/7.5                       | 23.8                          | 20.7                                          | 72.8                                          | [106]     |
|                 | USA      | 2014/2015 | GS/2                    | 12                | SPE-UPLC-MS/MS | NA                            | NA                            | ND                                            | ND                                            | [74]      |
|                 | USA      | NA        | NA                      | NA                | NA             | NA                            | NA                            | NA                                            | 10 000                                        | [117]     |
| p-aminophenol   | Portugal | 2011      | GS/7                    | 7                 | SPE-LC-MS/MS   | 67/225                        | 57                            | 950                                           | 1630                                          | [134]     |
|                 |          |           |                         |                   |                |                               | 59.4(100)                     | 1291.1(24 448.6)                              | 5513.8(106 970)                               |           |
| <b>Total</b>    |          |           |                         |                   |                |                               | <b>53.8(100)</b>              | <b>490.9(24 448.6)</b>                        | <b>3138.5(106 970)</b>                        |           |
| <b>Hormones</b> |          |           |                         |                   |                |                               |                               |                                               |                                               |           |
| Estrone         | Austria  | NA        | NA                      | NA                | NA             | NA                            | NA                            | NA                                            | 4.6                                           | [75]      |

| Pharmaceutical | Country    | Year      | Sampling type/locations | Number of samples | Method          | LOD/LOQ (ng L <sup>-1</sup> ) | Frequency (highest value) (%) | Average (highest value) (ng L <sup>-1</sup> ) | Maximum (highest value) (ng L <sup>-1</sup> ) | Reference |
|----------------|------------|-----------|-------------------------|-------------------|-----------------|-------------------------------|-------------------------------|-----------------------------------------------|-----------------------------------------------|-----------|
| (E1)           | Canada     | 2006/2007 | GS/17                   | 125               | SPE-LC-MS/MS    | NA                            | 0                             | ND                                            | ND                                            | [113]     |
|                | China      | 2007      | GS/14                   | 14                | SPE-GC-MS       | 0.2/0.5                       | 93                            | 14.9                                          | 75.0                                          | [125]     |
|                | China      | NA        | NA/1                    | 5                 | SPE-GC-MS       | 18/62                         | NA                            | 180                                           | NA                                            | [135]     |
|                | France     | 2007      | NA/2                    | 2                 | SPE-LC-MS/MS    | 0.02/NA                       | 50                            | 0.3                                           | 0.3                                           | [136]     |
|                | France     | 2007/2008 | GS/8                    | 24                | SPE-LC-MS/MS    | NA/0.04                       | 33                            | NA                                            | 2                                             | [92]      |
|                | France     | NA        | NA                      | NA                | NA              | NA                            | NA                            | NA                                            | 0.3                                           | [75]      |
|                | Germany    | 2002      | NA/1                    | 5                 | SPE-LC-MS/MS    | NA/0.1                        | 100                           | 0.86                                          | NA                                            | [65]      |
|                | Italy      | 2002      | FP/1                    | 7                 | SPE-LC-MS/MS    | 0.1/NA                        | 100                           | 8                                             | 15                                            | [67]      |
|                | Japan      | 2001      | GS/8                    | 8                 | SPE-GC-MS/MS    | 0.1                           | 100                           | 2.1                                           | 6.6                                           | [89]      |
|                | Korea      | 2004/2005 | GS/3                    | 8                 | SPE-LC-MS/MS    | NA                            | 38                            | 3.6                                           | 5                                             | [79]      |
|                | Korea      | NA        | NA                      | NA                | NA              | NA                            | NA                            | NA                                            | 69.1                                          | [33]      |
|                | Korea      | NA        | NA                      | NA                | NA              | NA                            | NA                            | NA                                            | 5                                             | [75]      |
|                | Luxembourg | 2007/2008 | TP/1                    | 24                | SPE-LC-MS/MS    | 0.3/1.0                       | NA                            | NA                                            | 27                                            | [60]      |
|                | Spain      | 2006      | GS/8                    | 16                | SPE-LC-MS/MS    | NA                            | 93                            | NA                                            | 5.8                                           | [120]     |
|                | Taiwan     | 2007/2008 | GS/15                   | 15                | SPE-LC-MS/MS    | 25/NA                         | 8                             | NA                                            | 61                                            | [122]     |
|                | USA        | 1999/2000 | CS/NA                   | 70                | SPE-UPLC-MS/MS  | 5/NA                          | 7.1                           | 27                                            | 112                                           | [116]     |
|                | USA        | 2006/2007 | GS/19                   | 32                | SPE-GC/LC-MS/MS | 0.20/NA                       | 79                            | 0.3                                           | 0.9                                           | [127]     |

| Pharmaceutical             | Country      | Year      | Sampling type/locations | Number of samples | Method         | LOD/LOQ (ng L <sup>-1</sup> ) | Frequency (highest value) (%) | Average (highest value) (ng L <sup>-1</sup> ) | Maximum (highest value) (ng L <sup>-1</sup> ) | Reference |
|----------------------------|--------------|-----------|-------------------------|-------------------|----------------|-------------------------------|-------------------------------|-----------------------------------------------|-----------------------------------------------|-----------|
| 17 $\beta$ -estradiol (E2) | USA          | 2012/2013 | GS/4                    | 28                | SPE-UPLC-MS/MS | 6.48/NA                       | 0                             | ND                                            | ND                                            | [87]      |
|                            |              |           |                         |                   |                |                               | 53.9(100)                     | 21.6(180.0)                                   | 22.9(112.0)                                   |           |
|                            | Austria      | NA        | NA                      | NA                | NA             | NA                            | NA                            | NA                                            | 1.2                                           | [75]      |
|                            | Canada       | 2006/2007 | GS/17                   | 125               | SPE-LC-MS/MS   | NA                            | 0                             | ND                                            | ND                                            | [113]     |
|                            | China        | 2007      | GS/14                   | 14                | SPE-GC-MS      | 0.3/1.0                       | 71                            | 2.1                                           | 7.5                                           | [125]     |
|                            | China        | NA        | NA/1                    | 5                 | SPE-GC-MS      | 9/32                          | NA                            | 100                                           | NA                                            | [135]     |
|                            | France       | 2007/2008 | GS/8                    | 24                | SPE-LC-MS/MS   | NA/0.06                       | 0                             | ND                                            | ND                                            | [92]      |
|                            | Italy        | 2002      | FP/1                    | 7                 | SPE-LC-MS/MS   | 0.2/NA                        | 100                           | 4                                             | 6                                             | [67]      |
|                            | Japan        | 2001      | GS/8                    | 8                 | SPE-GC-MS/MS   | 0.2                           | 38                            | 0.8                                           | 1.0                                           | [89]      |
|                            | Korea        | NA        | NA                      | NA                | NA             | NA                            | NA                            | NA                                            | 10.1                                          | [33]      |
|                            | Luxembourg   | 2007/2008 | TP/1                    | 24                | SPE-LC-MS/MS   | 1.0/3.0                       | NA                            | NA                                            | 35                                            | [60]      |
|                            | South Africa | 2014      | GS/4                    | 80                | SPE-HPLC-DAD   | 825.5/2476.5                  | NA                            | NA                                            | 15 700                                        | [137]     |
|                            | Spain        | 2006      | GS/8                    | 16                | SPE-LC-MS/MS   | NA                            | 0                             | ND                                            | ND                                            | [120]     |
|                            | Taiwan       | 2007/2008 | GS/15                   | 15                | SPE-LC-MS/MS   | 25/NA                         | 10                            | NA                                            | 119                                           | [122]     |
|                            | USA          | 1999/2000 | CS/NA                   | 70                | SPE-UPLC-MS/MS | 5/NA                          | 10                            | 9                                             | 93                                            | [116]     |
| USA                        | 2006/2007    | GS/19     | 32                      | SPE-GC/LC-MS/MS   | 0.50/NA        | 5                             | 17                            | 17                                            | [127]                                         |           |
| USA                        | 2008/2009    | GS/7      | 42                      | SPE-LC-MS/MS      | 1.3/3.8        | 7.1                           | 1.3                           | 1.7                                           | [106]                                         |           |

| Pharmaceutical                         | Country    | Year      | Sampling type/locations | Number of samples | Method         | LOD/LOQ (ng L <sup>-1</sup> ) | Frequency (highest value) (%) | Average (highest value) (ng L <sup>-1</sup> ) | Maximum (highest value) (ng L <sup>-1</sup> ) | Reference |
|----------------------------------------|------------|-----------|-------------------------|-------------------|----------------|-------------------------------|-------------------------------|-----------------------------------------------|-----------------------------------------------|-----------|
|                                        | USA        | 2012/2013 | GS/4                    | 28                | SPE-UPLC-MS/MS | 14.8/NA                       | 0                             | ND                                            | ND                                            | [87]      |
|                                        | USA        | 2014/2015 | GS/2                    | 12                | SPE-UPLC-MS/MS | NA                            | NA                            | 0.45                                          | 5.32                                          | [74]      |
|                                        |            |           |                         |                   |                |                               | 21.9(100)                     | 11.2(100.0)                                   | 999.8(15 700)                                 |           |
| 17 $\alpha$ -estradiol ( $\alpha$ -E2) | Canada     | 2006/2007 | GS/17                   | 125               | SPE-LC-MS/MS   | NA                            | 0                             | ND                                            | ND                                            | [113]     |
|                                        | France     | 2007/2008 | GS/8                    | 24                | SPE-LC-MS/MS   | NA/0.02                       | 0                             | ND                                            | ND                                            | [92]      |
|                                        | Japan      | 2001      | GS/8                    | 8                 | SPE-GC-MS/MS   | 0.2                           | 0                             | ND                                            | ND                                            | [89]      |
|                                        | USA        | 1999/2000 | CS/NA                   | 70                | SPE-UPLC-MS/MS | 5/NA                          | 5.7                           | 30                                            | 74                                            | [116]     |
|                                        |            |           |                         |                   |                |                               | 1.4(5.7)                      | 7.5(30.0)                                     | 18.5(74.0)                                    |           |
| 17 $\alpha$ -ethinylestradiol (EE2)    | Austria    | NA        | NA                      | NA                | NA             | NA                            | NA                            | NA                                            | 0.33                                          | [75]      |
|                                        | Canada     | 2006/2007 | GS/17                   | 125               | SPE-LC-MS/MS   | NA                            | 0                             | ND                                            | ND                                            | [113]     |
|                                        | France     | 2007/2008 | GS/8                    | 24                | SPE-LC-MS/MS   | NA/0.4                        | 0                             | ND                                            | ND                                            | [92]      |
|                                        | Italy      | 2002      | FP/1                    | 7                 | SPE-LC-MS/MS   | 0.4/NA                        | NA                            | 1                                             | 3                                             | [67]      |
|                                        | Korea      | 2004/2005 | GS/3                    | 8                 | SPE-LC-MS/MS   | NA                            | 0                             | ND                                            | ND                                            | [79]      |
|                                        | Korea      | NA        | NA                      | NA                | NA             | NA                            | NA                            | NA                                            | 1.9                                           | [33]      |
|                                        | Luxembourg | 2007/2008 | TP/1                    | 24                | SPE-LC-MS/MS   | 2.0/6.0                       | 0                             | ND                                            | ND                                            | [60]      |
|                                        | Spain      | 2006      | GS/8                    | 16                | SPE-LC-MS/MS   | NA                            | 0                             | ND                                            | ND                                            | [120]     |
|                                        | Spain      | NA        | NA/5                    | 5                 | SPE-UPLC-MS/MS | 2.4/8.0                       | 0                             | ND                                            | ND                                            | [94]      |
|                                        | USA        | 1999/2000 | CS/NA                   | 70                | SPE-UPLC-MS/MS | 5/NA                          | 15.7                          | 73                                            | 831                                           | [116]     |

| Pharmaceutical | Country | Year      | Sampling type/locations | Number of samples | Method          | LOD/LOQ (ng L <sup>-1</sup> ) | Frequency (highest value) (%) | Average (highest value) (ng L <sup>-1</sup> ) | Maximum (highest value) (ng L <sup>-1</sup> ) | Reference |  |
|----------------|---------|-----------|-------------------------|-------------------|-----------------|-------------------------------|-------------------------------|-----------------------------------------------|-----------------------------------------------|-----------|--|
|                | USA     | 2006/2007 | GS/19                   | 32                | SPE-GC/LC-MS/MS | 1.0/NA                        | 5                             | 1.4                                           | 1.4                                           | [127]     |  |
|                | USA     | 2012/2013 | GS/4                    | 28                | SPE-UPLC-MS/MS  | 8.48/NA                       | 0                             | ND                                            | ND                                            | [87]      |  |
|                | USA     | 2014/2015 | GS/2                    | 12                | SPE-UPLC-MS/MS  | NA                            | NA                            | ND                                            | ND                                            | [74]      |  |
|                |         |           |                         |                   |                 |                               | 2.3(15.7)                     | 6.9(73.0)                                     | 64.4(831.0)                                   |           |  |
| <b>Total</b>   |         |           |                         |                   |                 |                               | <b>26.2(100)</b>              | <b>12.6(180.0)</b>                            | <b>346.0(15 700)</b>                          |           |  |

CS - Composite sampling  
 ESI- Electrospray ionization  
 FP - Flow proportional sampling  
 FD - Fluorescence detection  
 GC - Gas chromatography  
 GS - Grab sampling  
 HPLC - High performance liquid chromatography  
 LC - Liquid chromatography  
 LOQ - Limit of quantification  
 MS - Mass spectrometry  
 NA - Not available  
 ND - Not detected  
 SPE - Solid phase extraction  
 TF - TurboFlow  
 TOF - Time-of-flight  
 TP - Time proportional sampling  
 UPLC - Ultra performance liquid chromatography  
 UHPLC - Ultra high performance liquid chromatography



**Table S5. Occurrence of pharmaceuticals in seawaters (SeaW), groundwaters (GWs), drinking waters (DWs) and mineral waters (DWs).**

| Pharmaceutical       | Sample    | Country | Year      | Sampling type/locations | Number of samples | Method         | LOD/LOQ (ng L <sup>-1</sup> ) | Frequency (highest value) (%) | Average (highest value) (ng L <sup>-1</sup> ) | Maximum (highest value) (ng L <sup>-1</sup> ) | Reference |
|----------------------|-----------|---------|-----------|-------------------------|-------------------|----------------|-------------------------------|-------------------------------|-----------------------------------------------|-----------------------------------------------|-----------|
| <b>Anxiolytics</b>   |           |         |           |                         |                   |                |                               |                               |                                               |                                               |           |
| Alprazolam (ALP)     | DW        | China   | 2014      | GS/5                    | 5                 | SPE-LC-MS/MS   | NA/0.1                        | 100                           | 2.4                                           | 2.6                                           | [4]       |
| Lorazepam (LOR)      | GW        | Serbia  | NA        | GS/10                   | 10                | SPE-LC-MS/MS   | 0.55/1.82                     | 0                             | ND                                            | ND                                            | [72]      |
|                      | GW        | Spain   | 2010/2011 | GS/31                   | 31                | SPE-LC-MS/MS   | NA                            | 23                            | 5.1                                           | 54                                            | [138]     |
|                      | <b>GW</b> |         |           |                         |                   |                |                               | 11.5(23)                      | 2.6(5.1)                                      | 27(54)                                        |           |
|                      | DW        | France  | 2007/2008 | GS/8                    | 24                | SPE-LC-MS/MS   | NA/12                         | 4                             | NA                                            | <LOQ                                          | [92]      |
|                      | DW        | China   | 2014      | GS/5                    | 5                 | SPE-LC-MS/MS   | NA/4.0                        | 0                             | ND                                            | ND                                            | [4]       |
|                      | <b>DW</b> |         |           |                         |                   |                |                               | 2.0(4.0)                      | 0                                             | 0                                             |           |
| Total                |           |         |           |                         |                   |                |                               | 25.4(100)                     | 1.9(5.1)                                      | 11.3(54.0)                                    |           |
| <b>Antibiotics</b>   |           |         |           |                         |                   |                |                               |                               |                                               |                                               |           |
| Azithromycin (AZI)   | SeaW      | China   | 2009      | GS/27                   | 27                | SPE-LC-MS/MS   | NA/0.28                       | 22                            | 0.14                                          | 1.2                                           | [95]      |
|                      | GW        | Serbia  | NA        | GS/10                   | 10                | SPE-LC-MS/MS   | 2.58/8.59                     | 20                            | 83                                            | 140                                           | [72]      |
|                      | GW        | Spain   | 2010/2011 | GS/31                   | 31                | SPE-LC-MS/MS   | NA                            | 93                            | 96.3                                          | 1620                                          | [138]     |
|                      | GW        | USA     | 2014/2015 | GS/6                    | 36                | SPE-UPLC-MS/MS | NA                            | NA                            | 12.21                                         | 131.43                                        | [74]      |
|                      | <b>GW</b> |         |           |                         |                   |                |                               | 56.5(93)                      | 63.8(96.3)                                    | 630.5(1620)                                   |           |
|                      | <b>GW</b> |         |           |                         |                   |                |                               | 45.0(93.0)                    | 47.9(96.3)                                    | 473.2(1620.0)                                 |           |
| Clarithromycin (CLA) | SeaW      | China   | 2009      | GS/27                   | 27                | SPE-LC-MS/MS   | NA/0.27                       | 37                            | 0.19                                          | 0.82                                          | [95]      |

| Pharmaceutical      | Sample      | Country               | Year      | Sampling type/locations | Number of samples | Method         | LOD/LOQ (ng L <sup>-1</sup> ) | Frequency (highest value) (%) | Average (highest value) (ng L <sup>-1</sup> ) | Maximum (highest value) (ng L <sup>-1</sup> ) | Reference |
|---------------------|-------------|-----------------------|-----------|-------------------------|-------------------|----------------|-------------------------------|-------------------------------|-----------------------------------------------|-----------------------------------------------|-----------|
|                     | GW          | Portugal              | 2013      | GS/NA                   | NA                | SPE-UPLC-MS/MS | NA/NA                         | NA                            | NA                                            | 3                                             | [112]     |
|                     | GW          | Spain                 | 2010/2011 | GS/31                   | 31                | SPE-LC-MS/MS   | NA                            | 100                           | 5.2                                           | 20.5                                          | [138]     |
|                     | <b>GW</b>   |                       |           |                         |                   |                |                               | 100                           | 5.2                                           | 11.8(20.5)                                    |           |
|                     | DW          | Portugal              | 2013      | GS/15                   | NA                | SPE-UPLC-MS/MS | NA/NA                         | 8                             | 2                                             | 5                                             | [112]     |
|                     |             |                       |           |                         |                   |                |                               | 48.3(100)                     | 2.5(5.2)                                      | 7.33(20.5)                                    |           |
| Ciprofloxacin (CIP) | SeaW        | China                 | 2009      | GS/27                   | 27                | SPE-LC-MS/MS   | NA/4.8                        | 93                            | 31                                            | 66                                            | [95]      |
|                     | SeaW        | Spain                 | 2011      | GS/4                    | 48                | SPE-LC-MS/MS   | 1.0/3.4                       | 60                            | 72                                            | 303.6                                         | [139]     |
|                     | <b>SeaW</b> |                       |           |                         |                   |                |                               | 76.5(93)                      | 51.5(72)                                      | 184.8(303.6)                                  |           |
|                     | GW          | America               | NA        | NA                      | NA                | NA             | NA                            | NA                            | NA                                            | 0.28                                          | [75]      |
|                     | GW          | Asia                  | NA        | NA                      | NA                | NA             | NA                            | NA                            | NA                                            | 40                                            | [75]      |
|                     | GW          | India (near industry) | 2008      | GS/6                    | NA                | SPE-LC-MS      | NA/10                         | NA                            | NA                                            | 14 000                                        | [77]      |
|                     | GW          | Spain                 | 2010/2011 | GS/31                   | 31                | SPE-LC-MS/MS   | NA                            | 91                            | 38.9                                          | 443                                           | [138]     |
|                     | GW          | USA                   | 2000      | NA/47                   | 47                | SPE-LC-MS/MS   | 20/NA                         | 0                             | ND                                            | ND                                            | [140]     |
|                     | <b>GW</b>   |                       |           |                         |                   |                |                               | 45.5(91)                      | 19.5(38.9)                                    | 2896.7(14 000)                                |           |
|                     | DW          | Canada                | 2006/2007 | GS/17                   | 123               | SPE-LC-MS/MS   | NA                            | 0                             | ND                                            | ND                                            | [113]     |
|                     |             |                       |           |                         |                   |                | 48.8(93.0)                    | 28.4(72.0)                    | 1856.6(14 000)                                |                                               |           |
| Erythromycin (ERY)  | SeaW        | China                 | 2009      | GS/27                   | 27                | SPE-LC-MS/MS   | NA/0.26                       | 100                           | 2.6                                           | 8.5                                           | [95]      |
|                     | GW          | Serbia                | NA        | GS/10                   | 10                | SPE-LC-MS/MS   | 1.65/5.48                     | 0                             | ND                                            | ND                                            | [72]      |
|                     | GW          | Spain                 | 2010/2011 | GS/31                   | 31                | SPE-LC-MS/MS   | NA                            | 33                            | 9.6                                           | 41.3                                          | [138]     |



| Pharmaceutical          | Sample      | Country     | Year      | Sampling type/locations | Number of samples | Method         | LOD/LOQ (ng L <sup>-1</sup> ) | Frequency (highest value) (%) | Average (highest value) (ng L <sup>-1</sup> ) | Maximum (highest value) (ng L <sup>-1</sup> ) | Reference |
|-------------------------|-------------|-------------|-----------|-------------------------|-------------------|----------------|-------------------------------|-------------------------------|-----------------------------------------------|-----------------------------------------------|-----------|
|                         | GW          | USA         | 2000      | NA/47                   | 47                | SPE-LC-MS/MS   | 50/NA                         | 0                             | ND                                            | ND                                            | [140]     |
|                         | GW          | USA         | 2014/2015 | GS/6                    | 36                | SPE-UPLC-MS/MS | NA                            | NA                            | 0.04                                          | 1.25                                          | [74]      |
|                         | <b>GW</b>   |             |           |                         |                   |                |                               | 11(33)                        | 2.4(9.6)                                      | 10.6(41.3)                                    |           |
|                         | DW          | Canada      | 2006/2007 | GS/17                   | 123               | SPE-LC-MS/MS   | NA/10                         | 3                             | 0.3                                           | 13                                            | [113]     |
|                         | DW          | Japan       | 2006/2010 | GS/8                    | 23                | SPE-LC-MS/MS   | NA/10.0                       | 0                             | ND                                            | ND                                            | [118]     |
|                         | DW          | Netherlands | 2009      | GS/2                    | 15                | SPE-LC-MS/MS   | NA                            | 0                             | ND                                            | ND                                            | [119]     |
|                         | <b>DW</b>   |             |           |                         |                   |                |                               | 1(3)                          | 0.1(0.3)                                      | 4.3(13)                                       |           |
|                         |             |             |           |                         |                   |                |                               | 19.4(100)                     | 1.6(9.6)                                      | 8.0(41.3)                                     |           |
| Total                   |             |             |           |                         |                   |                |                               | 36.7(100)                     | 17.7(96.3)                                    | 701.6(14 000)                                 |           |
| <b>Lipid regulators</b> |             |             |           |                         |                   |                |                               |                               |                                               |                                               |           |
| Bezafibrate (BEZ)       | GW          | Canada      | NA        | NA                      | NA                | NA             | NA                            | NA                            | NA                                            | 12                                            | [117]     |
|                         | GW          | Germany     | NA        | NA                      | NA                | NA             | NA                            | NA                            | NA                                            | 112                                           | [33]      |
|                         | GW          | Spain       | 2010/2011 | GS/31                   | 31                | SPE-LC-MS/MS   | NA                            | 51                            | 2.2                                           | 25.8                                          | [138]     |
|                         | <b>GW</b>   |             |           |                         |                   |                |                               | 51                            | 2.2                                           | 49.9(112)                                     |           |
|                         | MinW        | Spain       | 2012      | GS/11                   | 11                | SPE-UPLC-MS/MS | NA/0.2                        | 18                            | 1                                             | 10                                            | [42]      |
|                         | DW          | Canada      | 2006/2007 | GS/17                   | 123               | SPE-LC-MS/MS   | NA/0.5                        | 2                             | NA                                            | 1                                             | [113]     |
|                         | DW          | France      | 2007/2008 | GS/8                    | 24                | SPE-LC-MS/MS   | NA/1                          | 42                            | NA                                            | 2.2                                           | [92]      |
|                         | DW          | Germany     | NA        | NA                      | NA                | NA             | NA                            | NA                            | NA                                            | 27                                            | [117]     |
|                         | DW          | Japan       | 2006/2010 | GS/8                    | 23                | SPE-LC-MS/MS   | NA/10.0                       | 0                             | ND                                            | ND                                            | [118]     |
| DW                      | Netherlands | 2009        | GS/2      | 15                      | SPE-LC-MS/MS      | NA             | 0                             | ND                            | ND                                            | [119]                                         |           |

| Pharmaceutical    | Sample      | Country   | Year      | Sampling type/locations | Number of samples | Method           | LOD/LOQ (ng L <sup>-1</sup> ) | Frequency (highest value) (%) | Average (highest value) (ng L <sup>-1</sup> ) | Maximum (highest value) (ng L <sup>-1</sup> ) | Reference    |  |
|-------------------|-------------|-----------|-----------|-------------------------|-------------------|------------------|-------------------------------|-------------------------------|-----------------------------------------------|-----------------------------------------------|--------------|--|
|                   | DW          | Spain     | 2012      | GS/5                    | 8                 | SPE-UPLC-MS/MS   | NA/0.2                        | 0                             | ND                                            | ND                                            | [42]         |  |
|                   | <b>DW</b>   |           |           |                         |                   |                  |                               | 8.8(42)                       | 0                                             | 5.0(27)                                       |              |  |
|                   |             |           |           |                         |                   |                  |                               | 16.1(51.0)                    | 0.6(2.2)                                      | 19.0(112.0)                                   |              |  |
| Gemfibrozil (GEM) | SeaW        | Ireland   | 2011/2012 | GS/2                    | 12                | SPE-LC-MS/MS     | 38/NA                         | 50                            | 258                                           | 400                                           | [84]         |  |
|                   | SeaW        | Sweden    | NA        | GS/13                   | 13                | bag SPE-LC-MS/MS | 6/20                          | 0                             | ND                                            | ND                                            | [141]        |  |
|                   | <b>SeaW</b> |           |           |                         |                   |                  |                               | 25(50)                        | 129(258)                                      | 200(400)                                      |              |  |
|                   | GW          | Canada    | NA        | NA                      | NA                | NA               | NA                            | NA                            | NA                                            | 430                                           | [117]        |  |
|                   | GW          | Portugal  | 2013      | GS/NA                   | NA                | SPE-UPLC-MS/MS   | NA/NA                         | 0                             | ND                                            | ND                                            | [112]        |  |
|                   | GW          | Spain     | 2010/2011 | GS/31                   | 31                | SPE-LC-MS/MS     | NA                            | 81                            | 69.9                                          | 751                                           | [138]        |  |
|                   | GW          | Spain     | NA        | NA                      | NA                | NA               | NA                            | NA                            | NA                                            | 574                                           | [33]         |  |
|                   | GW          | USA       | 2000      | NA/47                   | 47                | SPE-LC-MS/MS     | 15/NA                         | 0                             | ND                                            | ND                                            | [140]        |  |
|                   | GW          | USA       | 2014/2015 | GS/6                    | 36                | SPE-UPLC-MS/MS   | NA                            | NA                            | 0.15                                          | 2.20                                          | [74]         |  |
|                   | <b>GW</b>   |           |           |                         |                   |                  |                               |                               | 27.0(81)                                      | 17.5(69.9)                                    | 292.9(751.0) |  |
|                   | MinW        | Spain     | 2012      | GS/11                   | 11                | SPE-UPLC-MS/MS   | NA/0.3                        | 82                            | 8                                             | 20                                            | [42]         |  |
|                   | DW          | Canada    | 2006/2007 | GS/17                   | 123               | SPE-LC-MS/MS     | NA/1                          | 15                            | 0.5                                           | 4                                             | [113]        |  |
|                   | DW          | Canada    | NA        | NA                      | NA                | NA               | NA                            | NA                            | NA                                            | 70                                            | [117]        |  |
|                   | DW          | Portugal  | 2013      | GS/15                   | NA                | SPE-UPLC-MS/MS   | NA/NA                         | NA                            | NA                                            | 18                                            | [112]        |  |
|                   | DW          | Spain     | 2012      | GS/5                    | 8                 | SPE-UPLC-MS/MS   | NA/0.3                        | 38                            | 2                                             | 7                                             | [42]         |  |
| DW                | USA         | 2006/2007 | GS/19     | 33                      | SPE-GC/LC-MS/MS   | 0.25/NA          | 33                            | 0.46                          | 2.1                                           | [127]                                         |              |  |
| <b>DW</b>         |             |           |           |                         |                   |                  |                               | 28.7(38)                      | 1.0(2.0)                                      | 20.2(70.0)                                    |              |  |

| Pharmaceutical       | Sample      | Country   | Year      | Sampling type/locations | Number of samples | Method           | LOD/LOQ (ng L <sup>-1</sup> ) | Frequency (highest value) (%) | Average (highest value) (ng L <sup>-1</sup> ) | Maximum (highest value) (ng L <sup>-1</sup> ) | Reference   |       |
|----------------------|-------------|-----------|-----------|-------------------------|-------------------|------------------|-------------------------------|-------------------------------|-----------------------------------------------|-----------------------------------------------|-------------|-------|
|                      |             |           |           |                         |                   |                  |                               | 33.2(82.0)                    | 33.9(258.0)                                   | 162.7(751.0)                                  |             |       |
| Total                |             |           |           |                         |                   |                  |                               | 25.8(82.0)                    | 22.8(258.0)                                   | 102.8(751.0)                                  |             |       |
| <b>Antiepileptic</b> |             |           |           |                         |                   |                  |                               |                               |                                               |                                               |             |       |
| Carbamazepine (CAR)  | SeaW        | Ireland   | 2011/2012 | GS/2                    | 12                | SPE-LC-MS/MS     | 4/NA                          | 100                           | 678                                           | 1410                                          | [84]        |       |
|                      | SeaW        | Spain     | 2011      | GS/4                    | 48                | SPE-LC-MS/MS     | 0.9/2.9                       | 0                             | ND                                            | ND                                            | [139]       |       |
|                      | SeaW        | Sweden    | NA        | GS/13                   | 13                | bag SPE-LC-MS/MS | 1/3                           | 100                           | NA                                            | 26.3                                          | [141]       |       |
|                      | <b>SeaW</b> |           |           |                         |                   |                  |                               |                               | 66.7(100)                                     | 339.0(678)                                    | 478.8(1410) |       |
|                      | GW          | America   | NA        | NA                      | NA                | NA               | NA                            | NA                            | NA                                            | NA                                            | 420         | [75]  |
|                      | GW          | Europe    | NA        | NA                      | NA                | NA               | NA                            | NA                            | NA                                            | NA                                            | 3600        | [75]  |
|                      | GW          | Germany   | 2000      | NA/105                  | 105               | SPE-GC/LC-MS/MS  | 32/NA                         | 12.4                          | NA                                            | 900                                           | [142]       |       |
|                      | GW          | Kenya     | 2012/2013 | GS/3                    | 3                 | SPE-LC-MS        | NA/NA                         | 66.6                          | 23.3                                          | 40.0                                          | [26]        |       |
|                      | GW          | NA        | NA        | NA                      | NA                | NA               | NA                            | NA                            | NA                                            | NA                                            | 465         | [117] |
|                      | GW          | Portugal  | 2013      | GS/NA                   | NA                | SPE-UPLC-MS/MS   | NA/NA                         | 0                             | NA                                            | NA                                            | 3           | [112] |
|                      | GW          | Serbia    | NA        | GS/10                   | 10                | SPE-LC-MS/MS     | 0.27/0.90                     | 60                            | 14.5                                          | 23                                            | [72]        |       |
|                      | GW          | Spain     | 2010/2011 | GS/31                   | 31                | SPE-LC-MS/MS     | NA                            | 97                            | 44.3                                          | 136                                           | [138]       |       |
|                      | GW          | USA       | 2004-2010 | NA/1231                 | 1231              | NA               | 30/NA                         | 1.46                          | 40                                            | 420                                           | [143]       |       |
|                      | GW          | USA       | 2014/2015 | GS/6                    | 36                | SPE-UPLC-MS/MS   | NA                            | NA                            | 5.10                                          | 15.90                                         | [74]        |       |
|                      | GW          | USA       | NA        | NA                      | NA                | NA               | NA                            | NA                            | NA                                            | NA                                            | 420         | [33]  |
| <b>GW</b>            |             |           |           |                         |                   |                  |                               | 39.6(97)                      | 25.4(44.3)                                    | 585.7(3600)                                   |             |       |
| DW                   | Canada      | 2006/2007 | GS/17     | 123                     | SPE-LC-MS/MS      | NA/1             | 25                            | 0.21                          | 601                                           | [113]                                         |             |       |
| DW                   | China       | 2014      | GS/5      | 5                       | SPE-LC-MS/MS      | NA/2.3           | 100                           | NA                            | 2.5                                           | [4]                                           |             |       |

| Pharmaceutical                                  | Sample    | Country               | Year      | Sampling type/locations | Number of samples | Method          | LOD/LOQ (ng L <sup>-1</sup> ) | Frequency (highest value) (%) | Average (highest value) (ng L <sup>-1</sup> ) | Maximum (highest value) (ng L <sup>-1</sup> ) | Reference |
|-------------------------------------------------|-----------|-----------------------|-----------|-------------------------|-------------------|-----------------|-------------------------------|-------------------------------|-----------------------------------------------|-----------------------------------------------|-----------|
|                                                 | DW        | France                | 2007/2008 | GS/8                    | 24                | SPE-LC-MS/MS    | NA/1                          | 83                            | NA                                            | 32.0                                          | [92]      |
|                                                 | DW        | Italy                 | NA        | GS/21                   | 21                | SPE-LC-MS/MS    | NA/0.18                       | 14.3                          | 7.6                                           | 10.3                                          | [144]     |
|                                                 | DW        | Japan                 | 2006/2010 | GS/8                    | 23                | SPE-LC-MS/MS    | NA/0.4                        | 13.0                          | 13.6                                          | 24.8                                          | [118]     |
|                                                 | DW        | Netherlands           | 2007      | NA                      | 2                 | NA              | NA                            | NA                            | NA                                            | 30                                            | [130]     |
|                                                 | DW        | Netherlands           | 2009      | GS/2                    | 15                | SPE-LC-MS/MS    | NA                            | 0                             | ND                                            | ND                                            | [119]     |
|                                                 | DW        | Portugal              | 2013      | GS/15                   | NA                | SPE-UPLC-MS/MS  | NA/NA                         | 96                            | 1.9                                           | 14                                            | [112]     |
|                                                 | DW        | USA                   | 2006/2007 | GS/19                   | 33                | SPE-GC/LC-MS/MS | 0.25/NA                       | 42                            | 6.4                                           | 18                                            | [127]     |
|                                                 | DW        | USA                   | 2012/2013 | GS/4                    | 27                | SPE-UPLC-MS/MS  | 0.03/NA                       | 0                             | ND                                            | ND                                            | [87]      |
|                                                 | DW        | USA                   | NA        | NA                      | NA                | NA              | NA                            | NA                            | NA                                            | 258                                           | [117]     |
|                                                 | <b>DW</b> |                       |           |                         |                   |                 |                               | 41.5(100)                     | 4.2(13.6)                                     | 90.1(601.0)                                   |           |
|                                                 |           |                       |           |                         |                   |                 |                               | 45.0(100)                     | 59.6(678.0)                                   | 354.8(3600.0)                                 |           |
| Selective serotonin reuptake inhibitors (SSRIs) |           |                       |           |                         |                   |                 |                               |                               |                                               |                                               |           |
| Citalopram (CIT)                                | GW        | India (near industry) | 2008      | GS/6                    | NA                | SPE-LC-MS       | NA/10                         | NA                            | NA                                            | 1400                                          | [77]      |
| Fluoxetine (FLU)                                | GW        | Spain                 | 2010/2011 | GS/31                   | 31                | SPE-LC-MS/MS    | NA                            | 18                            | 1.8                                           | 21                                            | [138]     |
|                                                 | GW        | USA                   | 2000      | NA/47                   | 47                | SPE-LC-MS/MS    | 18/NA                         | 4.3                           | NA                                            | 56                                            | [140]     |
|                                                 | GW        | USA                   | 2014/2015 | GS/6                    | 36                | SPE-UPLC-MS/MS  | NA                            | NA                            | 19.84                                         | 410.77                                        | [74]      |
|                                                 | <b>GW</b> |                       |           |                         |                   |                 |                               | 11.2(18.0)                    | 10.8(19.8)                                    | 162.6(410.8)                                  |           |
|                                                 | DW        | China                 | 2014      | GS/5                    | 5                 | SPE-LC-MS/MS    | NA/0.2                        | 0                             | ND                                            | 0.2                                           | [4]       |

| Pharmaceutical           | Sample      | Country | Year      | Sampling type/locations | Number of samples | Method           | LOD/LOQ (ng L <sup>-1</sup> ) | Frequency (highest value) (%) | Average (highest value) (ng L <sup>-1</sup> ) | Maximum (highest value) (ng L <sup>-1</sup> ) | Reference |
|--------------------------|-------------|---------|-----------|-------------------------|-------------------|------------------|-------------------------------|-------------------------------|-----------------------------------------------|-----------------------------------------------|-----------|
|                          | DW          | France  | 2007/2008 | GS/8                    | 24                | SPE-LC-MS/MS     | NA/85                         | 0                             | ND                                            | ND                                            | [92]      |
|                          | DW          | USA     | 2006/2007 | GS/19                   | 33                | SPE-GC/LC-MS/MS  | 0.50/NA                       | 9                             | 0.68                                          | 0.82                                          | [127]     |
|                          | <b>DW</b>   |         |           |                         |                   |                  |                               | 3.0(9.0)                      | 0.2(0.7)                                      | 0.3(0.8)                                      |           |
|                          |             |         |           |                         |                   |                  |                               | 6.26(18)                      | 4.5(19.8)                                     | 81.5(410.8)                                   |           |
| Norfluoxetine (Nor-FLU)  | DW          | France  | 2007/2008 | GS/8                    | 24                | SPE-LC-MS/MS     | NA/32                         | 0                             | ND                                            | ND                                            | [92]      |
|                          | DW          | USA     | 2006/2007 | GS/19                   | 33                | 0                | NA                            | NA                            | 0.77                                          | 0.77                                          | [127]     |
|                          | <b>DW</b>   |         |           |                         |                   |                  |                               | 0                             | 0.4(0.8)                                      | 0.4(0.8)                                      |           |
|                          |             |         |           |                         |                   |                  |                               | 0(0)                          | 0.4(0.8)                                      | 0.4(0.8)                                      |           |
| Paroxetine (PAR)         | GW          | Spain   | 2010/2011 | GS/31                   | 31                | SPE-LC-MS/MS     | NA                            | 20                            | 2.4                                           | 30.2                                          | [138]     |
|                          | GW          | USA     | 2014/2015 | GS/6                    | 36                | SPE-UPLC-MS/MS   | NA                            | NA                            | 1.4                                           | 5.88                                          | [74]      |
|                          | <b>GW</b>   |         |           |                         |                   |                  |                               | 20(20)                        | 1.9(2.4)                                      | 18.0(30.2)                                    |           |
|                          | DW          | Japan   | 2006/2010 | GS/8                    | 23                | SPE-LC-MS/MS     | NA/8.0                        | 0                             | ND                                            | ND                                            | [118]     |
| <b>Total</b>             |             |         |           |                         |                   |                  |                               | 10.0(20.0)                    | 1.3(2.4)                                      | 12.0(30.2)                                    |           |
|                          |             |         |           |                         |                   |                  |                               | 6.4(20)                       | 2.7(19.8)                                     | 160.5(1400.0)                                 |           |
| <b>Anti-inflammatory</b> |             |         |           |                         |                   |                  |                               |                               |                                               |                                               |           |
| Diclofenac (DIC)         | SeaW        | Ireland | 2011/2012 | GS/2                    | 12                | SPE-LC-MS/MS     | 22/NA                         | 92                            | 315                                           | 460                                           | [84]      |
|                          | SeaW        | Spain   | 2011      | GS/4                    | 48                | SPE-LC-MS/MS     | 1.4/4.6                       | 18.8                          | 86                                            | 343.6                                         | [139]     |
|                          | SeaW        | Sweden  | NA        | GS/13                   | 13                | bag SPE-LC-MS/MS | 4/13                          | 0                             | ND                                            | ND                                            | [141]     |
|                          | <b>SeaW</b> |         |           |                         |                   |                  |                               | 36.9(92.0)                    | 133.7(315.0)                                  | 267.9(460.0)                                  |           |
|                          | GW          | Europe  | NA        | NA                      | NA                | NA               | NA                            | NA                            | NA                                            | 24                                            | [75]      |
|                          | GW          | Germany | 2000      | NA/105                  | 105               | SPE-GC/LC-MS/MS  | 29/NA                         | 3.8                           | NA                                            | 590                                           | [142]     |

| Pharmaceutical                 | Sample    | Country  | Year      | Sampling type/locations | Number of samples | Method           | LOD/LOQ (ng L <sup>-1</sup> ) | Frequency (highest value) (%) | Average (highest value) (ng L <sup>-1</sup> ) | Maximum (highest value) (ng L <sup>-1</sup> ) | Reference |
|--------------------------------|-----------|----------|-----------|-------------------------|-------------------|------------------|-------------------------------|-------------------------------|-----------------------------------------------|-----------------------------------------------|-----------|
|                                | GW        | Germany  | NA        | NA                      | NA                | NA               | NA                            | NA                            | NA                                            | 3050                                          | [33]      |
|                                | GW        | Portugal | 2013      | GS/NA                   | NA                | SPE-UPLC-MS/MS   | NA/NA                         | 0                             | ND                                            | ND                                            | [112]     |
|                                | GW        | Serbia   | NA        | GS/10                   | 10                | SPE-LC-MS/MS     | 0.15/0.49                     | 0                             | ND                                            | ND                                            | [72]      |
|                                | GW        | Spain    | 2010/2011 | GS/31                   | 31                | SPE-LC-MS/MS     | NA                            | 65                            | 75.3                                          | 380                                           | [138]     |
|                                | <b>GW</b> |          |           |                         |                   |                  |                               | 17.2(65.0)                    | 25.1(75.3)                                    | 674.0(3050.0)                                 |           |
|                                | MinW      | Spain    | 2012      | GS/11                   | 11                | SPE-UPLC-MS/MS   | NA/1.0                        | 55                            | 25                                            | 87                                            | [42]      |
|                                | DW        | Canada   | 2006/2007 | GS/17                   | 123               | SPE-LC-MS/MS     | NA                            | 1                             | NA                                            | NA                                            | [113]     |
|                                | DW        | France   | 2007/2008 | GS/8                    | 24                | SPE-LC-MS/MS     | NA/1                          | 29                            | NA                                            | 1.0                                           | [92]      |
|                                | DW        | Germany  | NA        | NA                      | NA                | NA               | NA                            | NA                            | NA                                            | 35                                            | [117]     |
|                                | DW        | Japan    | 2006/2010 | GS/8                    | 23                | SPE-LC-MS/MS     | NA/2.5                        | 4.3                           | 15.8                                          | 15.8                                          | [118]     |
|                                | DW        | Portugal | 2013      | GS/15                   | NA                | SPE-UPLC-MS/MS   | NA/NA                         | NA                            | NA                                            | 11                                            | [112]     |
|                                | DW        | Spain    | 2012      | GS/5                    | 8                 | SPE-UPLC-MS/MS   | NA/1.0                        | 38                            | 18                                            | 60                                            | [42]      |
|                                | DW        | USA      | 2006/2007 | GS/19                   | 33                | SPE-GC/LC-MS/MS  | 0.25/NA                       | 0                             | ND                                            | ND                                            | [127]     |
|                                | <b>DW</b> |          |           |                         |                   |                  |                               | 14.5(38.0)                    | 11.3(18.0)                                    | 20.5(60.0)                                    |           |
|                                |           |          |           |                         |                   |                  |                               | 23.6(92.0)                    | 53.5(315.0)                                   | 316.1(3050.0)                                 |           |
| 4-hydroxydiclofenac (4-OH-DIC) | GW        | Spain    | 2010/2011 | GS/31                   | 31                | SPE-LC-MS/MS     | NA                            | 26                            | 15.3                                          | 147                                           | [138]     |
| Ibuprofen (IBU)                | SeaW      | Sweden   | NA        | GS/13                   | 13                | bag SPE-LC-MS/MS | 7/23                          | 0                             | ND                                            | ND                                            | [141]     |
|                                | GW        | America  | NA        | NA                      | NA                | NA               | NA                            | NA                            | NA                                            | 3.97                                          | [75]      |

| Pharmaceutical | Sample    | Country  | Year      | Sampling type/locations | Number of samples | Method           | LOD/LOQ (ng L <sup>-1</sup> ) | Frequency (highest value) (%) | Average (highest value) (ng L <sup>-1</sup> ) | Maximum (highest value) (ng L <sup>-1</sup> ) | Reference |
|----------------|-----------|----------|-----------|-------------------------|-------------------|------------------|-------------------------------|-------------------------------|-----------------------------------------------|-----------------------------------------------|-----------|
|                | GW        | Canada   | NA        | NA                      | NA                | NA               | NA                            | NA                            | NA                                            | 2150                                          | [117]     |
|                | GW        | Europe   | NA        | NA                      | NA                | NA               | NA                            | NA                            | NA                                            | 395                                           | [33,75]   |
|                | GW        | Portugal | 2013      | GS/NA                   | NA                | SPE-UPLC-MS/MS   | NA/NA                         | 0                             | ND                                            | ND                                            | [112]     |
|                | GW        | Serbia   | NA        | GS/10                   | 10                | SPE-LC-MS/MS     | 3.28/10.93                    | 0                             | ND                                            | ND                                            | [72]      |
|                | GW        | Spain    | 2010/2011 | GS/31                   | 31                | SPE-LC-MS/MS     | NA                            | 66                            | 87.1                                          | 988                                           | [138]     |
|                | GW        | USA      | 2000      | NA/47                   | 47                | SPE-LC-MS/MS     | 18/NA                         | 2.1                           | ND                                            | 3110                                          | [140]     |
|                | GW        | USA      | 2014/2015 | GS/6                    | 36                | SPE-UPLC-MS/MS   | NA                            | NA                            | 0.07                                          | 2.35                                          | [74]      |
|                | <b>GW</b> |          |           |                         |                   |                  |                               | 17.0(66.0)                    | 17.4(87.1)                                    | 831.2(3110.0)                                 |           |
|                | MinW      | Spain    | 2012      | GS/11                   | 11                | SPE-UPLC-MS/MS   | NA/5.0                        | 73                            | 12                                            | 46                                            | [42]      |
|                | DW        | Canada   | 2006/2007 | GS/17                   | 123               | SPE-LC-MS/MS     | NA/0.5                        | 15                            | 0.33                                          | 25                                            | [113]     |
|                | DW        | France   | 2007/2008 | GS/8                    | 24                | SPE-LC-MS/MS     | NA/7                          | 38                            | NA                                            | 1.3                                           | [92]      |
|                | DW        | Japan    | 2006/2010 | GS/8                    | 23                | SPE-LC-MS/MS     | NA/1.1                        | 8.7                           | 5.0                                           | 6.0                                           | [118]     |
|                | DW        | Portugal | 2013      | GS/15                   | NA                | SPE-UPLC-MS/MS   | NA/NA                         | NA                            | NA                                            | 21                                            | [112]     |
|                | DW        | Spain    | 2012      | GS/5                    | 8                 | SPE-UPLC-MS/MS   | NA/5.0                        | 88                            | 39                                            | 94                                            | [42]      |
|                | DW        | USA      | 2012/2013 | GS/4                    | 27                | SPE-UPLC-MS/MS   | 0.85/NA                       | 4                             | NA                                            | 1.16                                          | [87]      |
|                | DW        | USA      | NA        | NA                      | NA                | NA               | NA                            | NA                            | NA                                            | 1350                                          | [117]     |
|                | <b>DW</b> |          |           |                         |                   |                  |                               | 30.7(88.0)                    | 14.8(39.0)                                    | 214.1(1350.0)                                 |           |
|                |           |          |           |                         |                   |                  |                               | 26.8(88.0)                    | 14.4(87.1)                                    | 427.7(3110.0)                                 |           |
| Naproxen (NAP) | SeaW      | Sweden   | NA        | GS/13                   | 13                | bag SPE-LC-MS/MS | 12/40                         | 0                             | ND                                            | ND                                            | [141]     |

| Pharmaceutical     | Sample    | Country  | Year      | Sampling type/locations | Number of samples | Method          | LOD/LOQ (ng L <sup>-1</sup> ) | Frequency (highest value) (%) | Average (highest value) (ng L <sup>-1</sup> ) | Maximum (highest value) (ng L <sup>-1</sup> ) | Reference |
|--------------------|-----------|----------|-----------|-------------------------|-------------------|-----------------|-------------------------------|-------------------------------|-----------------------------------------------|-----------------------------------------------|-----------|
|                    | GW        | Canada   | NA        | NA                      | NA                | NA              | NA                            | NA                            | NA                                            | 300                                           | [117]     |
|                    | GW        | Portugal | 2013      | GS/NA                   | NA                | SPE-UPLC-MS/MS  | NA/NA                         | 0                             | ND                                            | ND                                            | [112]     |
|                    | GW        | Spain    | 2010/2011 | GS/31                   | 31                | SPE-LC-MS/MS    | NA                            | 13                            | 0.1                                           | 5.6                                           | [138]     |
|                    | GW        | Spain    | NA        | NA                      | NA                | NA              | NA                            | NA                            | NA                                            | 263                                           | [33]      |
|                    | GW        | USA      | 2014/2015 | GS/6                    | 36                | SPE-UPLC-MS/MS  | NA                            | NA                            | 1.93                                          | 13.15                                         | [74]      |
|                    | <b>GW</b> |          |           |                         |                   |                 |                               | 6.5(13.0)                     | 0.7(1.9)                                      | 116.4(300.0)                                  |           |
|                    | MinW      | Spain    | 2012      | GS/11                   | 11                | SPE-UPLC-MS/MS  | NA/0.5                        | 82                            | 25                                            | 49                                            | [42]      |
|                    | DW        | Canada   | 2006/2007 | GS/17                   | 123               | SPE-LC-MS/MS    | NA/2                          | 0                             | ND                                            | ND                                            | [113]     |
|                    | DW        | France   | 2007/2008 | GS/8                    | 24                | SPE-LC-MS/MS    | NA/4                          | 17                            | NA                                            | 0.5                                           | [92]      |
|                    | DW        | Portugal | 2013      | GS/15                   | NA                | SPE-UPLC-MS/MS  | NA/NA                         | NA                            | NA                                            | 6                                             | [112]     |
|                    | DW        | Spain    | 2012      | GS/5                    | 8                 | SPE-UPLC-MS/MS  | NA/0.5                        | 100                           | 11                                            | 93                                            | [42]      |
|                    | DW        | USA      | 2006/2007 | GS/19                   | 33                | SPE-GC/LC-MS/MS | 0.50/NA                       | 0                             | ND                                            | ND                                            | [127]     |
|                    | <b>DW</b> |          |           |                         |                   |                 |                               | 29.3(100.0)                   | 3.7(11.0)                                     | 19.9(93.0)                                    |           |
|                    |           |          |           |                         |                   |                 |                               | 26.5(100)                     | 4.8(25.0)                                     | 60.9(300.0)                                   |           |
| Paracetamol (PARA) | SeaW      | Spain    | 2011      | GS/4                    | 48                | SPE-LC-MS/MS    | 0.6/2                         | 6                             | 116                                           | 297                                           | [139]     |
|                    | GW        | Europe   | NA        | NA                      | NA                | NA              | NA                            | NA                            | NA                                            | 1890                                          | [75]      |
|                    | GW        | France   | NA        | NA                      | NA                | NA              | NA                            | NA                            | NA                                            | 211                                           | [117]     |
|                    | GW        | Kenya    | 2012/2013 | GS/3                    | 3                 | SPE-LC-MS       | NA/NA                         | 100                           | 20                                            | 30                                            | [26]      |



| Pharmaceutical  | Sample    | Country  | Year      | Sampling type/locations | Number of samples | Method         | LOD/LOQ (ng L <sup>-1</sup> ) | Frequency (highest value) (%) | Average (highest value) (ng L <sup>-1</sup> ) | Maximum (highest value) (ng L <sup>-1</sup> ) | Reference |
|-----------------|-----------|----------|-----------|-------------------------|-------------------|----------------|-------------------------------|-------------------------------|-----------------------------------------------|-----------------------------------------------|-----------|
|                 | GW        | Portugal | 2013      | GS/NA                   | NA                | SPE-UPLC-MS/MS | NA/NA                         | NA                            | NA                                            | 3                                             | [112]     |
|                 | GW        | Serbia   | NA        | GS/10                   | 10                | SPE-LC-MS/MS   | 0.27/0.90                     | 0                             | ND                                            | ND                                            | [72]      |
|                 | GW        | Spain    | 2010/2011 | GS/31                   | 31                | SPE-LC-MS/MS   | NA                            | 5                             | <LOQ                                          | <LOQ                                          | [138]     |
|                 | GW        | USA      | 2000      | NA/47                   | 47                | SPE-LC-MS/MS   | 9/NA                          | 6.4                           | NA                                            | 380                                           | [140]     |
|                 | GW        | USA      | 2004-2010 | NA/1231                 | 1231              | NA             | 60/NA                         | 0.32                          | 180                                           | 1890                                          | [143]     |
|                 | GW        | USA      | 2014/2015 | GS/6                    | 36                | SPE-UPLC-MS/MS | NA                            | NA                            | 0.23                                          | 2.5                                           | [74]      |
|                 | <b>GW</b> |          |           |                         |                   |                |                               | 22.3(100)                     | 40.0(180.0)                                   | 489.6(1890.0)                                 |           |
|                 | DW        | Canada   | 2006/2007 | GS/17                   | 123               | SPE-LC-MS/MS   | NA/2                          | 1                             | NA                                            | 17                                            | [113]     |
|                 | DW        | France   | 2007/2008 | GS/8                    | 24                | SPE-LC-MS/MS   | NA/2                          | 100                           | NA                                            | 45.0                                          | [92]      |
|                 | DW        | France   | NA        | NA                      | NA                | NA             | NA                            | NA                            | NA                                            | 210                                           | [117]     |
|                 | DW        | Japan    | 2006/2010 | GS/8                    | 23                | SPE-LC-MS/MS   | NA/2.8                        | 0                             | ND                                            | ND                                            | [118]     |
|                 | DW        | Portugal | 2013      | GS/15                   | NA                | SPE-UPLC-MS/MS | NA/NA                         | NA                            | NA                                            | 47                                            | [112]     |
|                 | <b>DW</b> |          |           |                         |                   |                |                               | 33.7(100)                     | 0                                             | 63.8(210.0)                                   |           |
|                 |           |          |           |                         |                   |                |                               | 24.3(100)                     | 45.2(180.0)                                   | 334.8(1890.0)                                 |           |
| <b>Total</b>    |           |          |           |                         |                   |                |                               | 25.2(100)                     | 29.1(315.0)                                   | 313.9(3110.0)                                 |           |
| <b>Hormones</b> |           |          |           |                         |                   |                |                               |                               |                                               |                                               |           |
| Estrone (E1)    | GW        | Austria  | NA        | NA                      | NA                | NA             | NA                            | NA                            | NA                                            | 1.6                                           | [75]      |
|                 | GW        | France   | 2007      | NA/3                    | 3                 | SPE-LC-MS/MS   | 0.02/NA                       | 67                            | 2.2                                           | 3.5                                           | [136]     |
|                 | GW        | France   | NA        | NA                      | NA                | NA             | NA                            | NA                            | NA                                            | 3.5                                           | [75]      |
|                 | GW        | USA      | NA        | NA                      | NA                | NA             | NA                            | NA                            | NA                                            | 79                                            | [33]      |

| Pharmaceutical     | Sample    | Country | Year      | Sampling type/locations | Number of samples | Method          | LOD/LOQ (ng L <sup>-1</sup> ) | Frequency (highest value) (%) | Average (highest value) (ng L <sup>-1</sup> ) | Maximum (highest value) (ng L <sup>-1</sup> ) | Reference |
|--------------------|-----------|---------|-----------|-------------------------|-------------------|-----------------|-------------------------------|-------------------------------|-----------------------------------------------|-----------------------------------------------|-----------|
|                    | <b>GW</b> |         |           |                         |                   |                 |                               | 67.0                          | 2.2                                           | 21.9(79.0)                                    |           |
|                    | DW        | Canada  | 2006/2007 | GS/17                   | 123               | SPE-LC-MS/MS    | NA                            | 0                             | ND                                            | ND                                            | [113]     |
|                    | DW        | France  | 2007/2008 | GS/8                    | 24                | SPE-LC-MS/MS    | NA/0.04                       | 4                             | NA                                            | 0.3                                           | [92]      |
|                    | DW        | Germany | 2002      | NA/1                    | 5                 | SPE-LC-MS/MS    | NA/0.1                        | 100                           | 0.16                                          | NA                                            | [65]      |
|                    | DW        | USA     | 2006/2007 | GS/19                   | 33                | SPE-GC/LC-MS/MS | 0.20/NA                       | 0                             | ND                                            | ND                                            | [127]     |
|                    | DW        | USA     | 2012/2013 | GS/4                    | 27                | SPE-UPLC-MS/MS  | 6.48/NA                       | 0                             | ND                                            | ND                                            | [87]      |
|                    | <b>DW</b> |         |           |                         |                   |                 |                               | 20.8(100)<br>28.5(100)        | 0(0.2)<br>0.5(2.2)                            | 0.1(0.3)<br>11.0(79.0)                        |           |
| 17β-estradiol (E2) | GW        | Austria | NA        | NA                      | NA                | NA              | NA                            | NA                            | NA                                            | 0.79                                          | [75]      |
|                    | GW        | France  | 2007      | NA/3                    | 3                 | SPE-LC-MS/MS    | 0.03/NA                       | 67                            | 0.8                                           | 1.3                                           | [136]     |
|                    | GW        | USA     | 2014/2015 | GS/6                    | 36                | SPE-UPLC-MS/MS  | NA                            | NA                            | 0.98                                          | 27.47                                         | [74]      |
|                    | GW        | USA     | NA        | NA                      | NA                | NA              | NA                            | NA                            | NA                                            | 147                                           | [33]      |
|                    | <b>GW</b> |         |           |                         |                   |                 |                               | 67.0                          | 0.9(1.0)                                      | 44.1(147.0)                                   |           |
|                    | DW        | Canada  | 2006/2007 | GS/17                   | 123               | SPE-LC-MS/MS    | NA                            | 0                             | ND                                            | ND                                            | [113]     |
|                    | DW        | France  | 2007/2008 | GS/8                    | 24                | SPE-LC-MS/MS    | NA/0.06                       | 0                             | ND                                            | ND                                            | [92]      |
|                    | DW        | USA     | 2006/2007 | GS/19                   | 33                | SPE-GC/LC-MS/MS | 0.50/NA                       | 0                             | ND                                            | ND                                            | [127]     |
|                    | DW        | USA     | 2012/2013 | GS/4                    | 27                | SPE-UPLC-MS/MS  | 14.8/NA                       | 0                             | ND                                            | ND                                            | [87]      |
|                    | <b>DW</b> |         |           |                         |                   |                 |                               |                               | 0                                             | 0                                             | 0         |

| Pharmaceutical                         | Sample    | Country | Year      | Sampling type/locations | Number of samples | Method          | LOD/LOQ (ng L <sup>-1</sup> ) | Frequency (highest value) (%) | Average (highest value) (ng L <sup>-1</sup> ) | Maximum (highest value) (ng L <sup>-1</sup> ) | Reference |
|----------------------------------------|-----------|---------|-----------|-------------------------|-------------------|-----------------|-------------------------------|-------------------------------|-----------------------------------------------|-----------------------------------------------|-----------|
| 17 $\alpha$ -estradiol ( $\alpha$ -E2) | GW        | France  | 2007      | NA/3                    | 3                 | SPE-LC-MS/MS    | 0.03/NA                       | 67                            | 1.0                                           | 1.6                                           | [136]     |
|                                        | DW        | Canada  | 2006/2007 | GS/17                   | 123               | SPE-LC-MS/MS    | NA                            | 0                             | ND                                            | ND                                            | [113]     |
|                                        | DW        | France  | 2007/2008 | GS/8                    | 24                | SPE-LC-MS/MS    | NA/0.02                       | 0                             | ND                                            | ND                                            | [92]      |
|                                        | <b>DW</b> |         |           |                         |                   |                 |                               | 0                             | 0                                             | 0                                             |           |
| 17 $\alpha$ -ethinylestradiol (EE2)    | GW        | Austria | NA        | NA                      | NA                | NA              | NA                            | NA                            | NA                                            | 0.94                                          | [75]      |
|                                        | GW        | France  | 2007      | NA/3                    | 3                 | SPE-LC-MS/MS    | 0.03/NA                       | 67                            | 1.8                                           | 3                                             | [136]     |
|                                        | GW        | France  | NA        | NA                      | NA                | NA              | NA                            | NA                            | NA                                            | 3                                             | [75]      |
|                                        | GW        | USA     | 2014/2015 | GS/6                    | 36                | SPE-UPLC-MS/MS  | NA                            | NA                            | 120.01                                        | 4320.35                                       | [74]      |
|                                        | GW        | USA     | NA        | NA                      | NA                | NA              | NA                            | NA                            | NA                                            | 230                                           | [33]      |
|                                        | <b>GW</b> |         |           |                         |                   |                 |                               | 67.0                          | 60.9(120.0)                                   | 911.5(4320.4)                                 |           |
|                                        | DW        | Canada  | 2006/2007 | GS/17                   | 123               | SPE-LC-MS/MS    | NA                            | 0                             | ND                                            | ND                                            | [113]     |
|                                        | DW        | France  | 2007/2008 | GS/8                    | 24                | SPE-LC-MS/MS    | NA/0.4                        | 0                             | ND                                            | ND                                            | [92]      |
|                                        | DW        | USA     | 2006/2007 | GS/19                   | 33                | SPE-GC/LC-MS/MS | 1.0/NA                        | 0                             | ND                                            | ND                                            | [127]     |
|                                        | DW        | USA     | 2012/2013 | GS/4                    | 27                | SPE-UPLC-MS/MS  | 8.48/NA                       | 0                             | ND                                            | ND                                            | [87]      |
| <b>DW</b>                              |           |         |           |                         |                   |                 | 0                             | 0                             | 0                                             |                                               |           |
| <b>Total</b>                           |           |         |           |                         |                   |                 |                               | 13.4(67.0)                    | 20.3(120.0)                                   | 506.4(4320.4)                                 |           |
|                                        |           |         |           |                         |                   |                 |                               | 19.6(100)                     | 6.3(120.0)                                    | 172.3(4320.4)                                 |           |

CS - Composite sampling  
DW - Drinking water  
ESI- Electrospray ionization  
FP - Flow proportional sampling  
GC - Gas chromatography  
GS - Grab sampling

GW - Groundwater  
LC - Liquid chromatography  
LOQ - Limit of quantification  
MS - Mass spectrometry  
MinW – Mineral water  
NA - Not available  
ND - Not detected  
SPE - Solid phase extraction  
SeaW - Seawater  
TP - Time proportional sampling  
UPLC - Ultra performance liquid chromatography  
UHPLC - Ultra high performance liquid chromatography

## References:

- [1] L. Vergeynst, A. Haeck, P. De Wispelaere, H. Van Langenhove, K. Demeestere, Multi-residue analysis of pharmaceuticals in wastewater by liquid chromatography-magnetic sector mass spectrometry: Method quality assessment and application in a Belgian case study., *Chemosphere*. 119 (2015) S2–S8. doi:10.1016/j.chemosphere.2014.03.069.
- [2] S. Yuan, X. Jiang, X. Xia, H. Zhang, S. Zheng, Detection, occurrence and fate of 22 psychiatric pharmaceuticals in psychiatric hospital and municipal wastewater treatment plants in Beijing, China., *Chemosphere*. 90 (2013) 2520–2525. doi:10.1016/j.chemosphere.2012.10.089.
- [3] S.-L. YUAN, X.-F. LI, X.-M. JIANG, H.-X. ZHANG, S.-K. ZHENG, Simultaneous determination of 13 psychiatric pharmaceuticals in sewage by automated solid phase extraction and liquid chromatography-mass spectrometry., *Chinese J. Anal. Chem.* 41 (2013) 49–56. doi:10.1016/S1872-2040(13)60623-4.
- [4] M. Wu, J. Xiang, C. Que, F. Chen, G. Xu, Occurrence and fate of psychiatric pharmaceuticals in the urban water system of Shanghai, China, *Chemosphere*. 138 (2015) 486–493. doi:10.1016/j.chemosphere.2015.07.002.
- [5] B. Subedi, K. Balakrishna, D.I. Joshua, K. Kannan, Mass loading and removal of pharmaceuticals and personal care products including psychoactives, antihypertensives, and antibiotics in two sewage treatment plants in southern India, *Chemosphere*. 167 (2017) 429–437. doi:10.1016/j.chemosphere.2016.10.026.
- [6] M.A. Sousa, C. Gonçalves, E. Cunha, J. Hajšlová, M.F. Alpendurada, Cleanup strategies and advantages in the determination of several therapeutic classes of pharmaceuticals in wastewater samples by SPE-LC-MS/MS., *Anal. Bioanal. Chem.* 399 (2011) 807–22. doi:10.1007/s00216-010-4297-0.
- [7] L.H.M.L.M. Santos, M. Gros, S. Rodriguez-Mozaz, C. Delerue-Matos, A. Pena, D. Barceló, M.C.B.S.M. Montenegro, Contribution of hospital effluents to the load of pharmaceuticals in urban wastewaters: identification of ecologically relevant pharmaceuticals., *Sci. Total Environ.* 461–462 (2013) 302–16. doi:10.1016/j.scitotenv.2013.04.077.
- [8] R. Salgado, R. Marques, J.P. Noronha, J.T. Mexia, G. Carvalho, A.

- Oehmen, M.A.M. Reis, Assessing the diurnal variability of pharmaceutical and personal care products in a full-scale activated sludge plant., *Environ. Pollut.* 159 (2011) 2359–2367. doi:10.1016/j.envpol.2011.07.004.
- [9] E. Gracia-Lor, J. V. Sancho, R. Serrano, F. Hernández, Occurrence and removal of pharmaceuticals in wastewater treatment plants at the Spanish Mediterranean area of Valencia, *Chemosphere.* 87 (2012) 453–462. doi:10.1016/j.chemosphere.2011.12.025.
- [10] B. Subedi, K. Kannan, Occurrence and fate of select psychoactive pharmaceuticals and antihypertensives in two wastewater treatment plants in New York State, USA., *Sci. Total Environ.* 514 (2015) 273–280. doi:10.1016/j.scitotenv.2015.01.098.
- [11] P. Verlicchi, M. Al Aukidy, E. Zambello, Occurrence of pharmaceutical compounds in urban wastewater: removal, mass load and environmental risk after a secondary treatment-a review., *Sci. Total Environ.* 429 (2012) 123–155. doi:10.1016/j.scitotenv.2012.04.028.
- [12] A. Ginebreda, A. Jelić, M. Petrović, M. López de Alda, D. Barceló, New indexes for compound prioritization and complexity quantification on environmental monitoring inventories., *Environ. Sci. Pollut. Res. Int.* 19 (2012) 958–70. doi:10.1007/s11356-011-0557-6.
- [13] R.H. Lindberg, M. Östman, U. Olofsson, R. Grabic, J. Fick, Occurrence and behaviour of 105 active pharmaceutical ingredients in sewage waters of a municipal sewer collection system., *Water Res.* 58 (2014) 221–9. doi:10.1016/j.watres.2014.03.076.
- [14] M. Gros, M. Petrović, D. Barceló, Development of a multi-residue analytical methodology based on liquid chromatography-tandem mass spectrometry (LC-MS/MS) for screening and trace level determination of pharmaceuticals in surface and wastewaters., *Talanta.* 70 (2006) 678–90. doi:10.1016/j.talanta.2006.05.024.
- [15] O. Golovko, V. Kumar, G. Fedorova, T. Randak, R. Grabic, Seasonal changes in antibiotics, antidepressants/psychiatric drugs, antihistamines and lipid regulators in a wastewater treatment plant., *Chemosphere.* 111 (2014) 418–26. doi:10.1016/j.chemosphere.2014.03.132.
- [16] M.E. Dasenaki, N.S. Thomaidis, Multianalyte method for the determination of pharmaceuticals in wastewater samples using solid-

phase extraction and liquid chromatography-tandem mass spectrometry., *Anal. Bioanal. Chem.* (2015) 4229–4245.  
doi:10.1007/s00216-015-8654-x.

- [17] P. Verlicchi, M. Al Aukidy, A. Jelic, M. Petrović, D. Barceló, Comparison of measured and predicted concentrations of selected pharmaceuticals in wastewater and surface water: a case study of a catchment area in the Po Valley (Italy)., *Sci. Total Environ.* 470–471 (2014) 844–54. doi:10.1016/j.scitotenv.2013.10.026.
- [18] A. Murata, H. Takada, K. Mutoh, H. Hosoda, A. Harada, N. Nakada, Nationwide monitoring of selected antibiotics: Distribution and sources of sulfonamides, trimethoprim, and macrolides in Japanese rivers., *Sci. Total Environ.* 409 (2011) 5305–5312.  
doi:10.1016/j.scitotenv.2011.09.014.
- [19] C. Miège, J.M. Choubert, L. Ribeiro, M. Eusèbe, M. Coquery, Fate of pharmaceuticals and personal care products in wastewater treatment plants-conception of a database and first results., *Environ. Pollut.* 157 (2009) 1721–6. doi:10.1016/j.envpol.2008.11.045.
- [20] P. Paíga, L.H.M.L.M. Santos, S. Ramos, S. Jorge, J.G. Silva, C. Delerue-Matos, Presence of pharmaceuticals in the Lis river (Portugal): Sources, fate and seasonal variation., *Sci. Total Environ.* 573 (2016) 164–177. doi:10.1016/j.scitotenv.2016.08.089.
- [21] M. Gros, S. Rodríguez-Mozaz, D. Barceló, Rapid analysis of multiclass antibiotic residues and some of their metabolites in hospital, urban wastewater and river water by ultra-high-performance liquid chromatography coupled to quadrupole-linear ion trap tandem mass spectrometry., *J. Chromatogr. A.* 1292 (2013) 173–88.  
doi:10.1016/j.chroma.2012.12.072.
- [22] B.D. Blair, J.P. Crago, C.J. Hedman, R.J.F. Treguer, C. Magruder, L.S. Royer, R.D. Klaper, Evaluation of a model for the removal of pharmaceuticals, personal care products, and hormones from wastewater., *Sci. Total Environ.* 444 (2013) 515–521.  
doi:10.1016/j.scitotenv.2012.11.103.
- [23] E. Zuccato, S. Castiglioni, R. Bagnati, M. Melis, R. Fanelli, Source, occurrence and fate of antibiotics in the Italian aquatic environment., *J. Hazard. Mater.* 179 (2010) 1042–8.  
doi:10.1016/j.jhazmat.2010.03.110.
- [24] K. Dutta, M.Y. Lee, W.W.P. Lai, C.H. Lee, A.Y.C. Lin, C.F. Lin, J.G. Lin, Removal of pharmaceuticals and organic matter from

municipal wastewater using two-stage anaerobic fluidized membrane bioreactor., *Bioresour. Technol.* 165 (2014) 42–49.  
doi:10.1016/j.biortech.2014.03.054.

- [25] M. Papageorgiou, C. Kosma, D. Lambropoulou, Seasonal occurrence, removal, mass loading and environmental risk assessment of 55 pharmaceuticals and personal care products in a municipal wastewater treatment plant in Central Greece., *Sci. Total Environ.* 543 (2016) 547–569. doi:10.1016/j.scitotenv.2015.11.047.
- [26] K.O. K'oreje, L. Vergeynst, D. Ombaka, P. De Wispelaere, M. Okoth, H. Van Langenhove, K. Demeestere, Occurrence patterns of pharmaceutical residues in wastewater, surface water and groundwater of Nairobi and Kisumu city, Kenya, *Chemosphere.* 149 (2016) 238–244. doi:10.1016/j.chemosphere.2016.01.095.
- [27] W. Sim, J. Lee, J. Oh, Occurrence and fate of pharmaceuticals in wastewater treatment plants and rivers in Korea., *Environ. Pollut.* 158 (2010) 1938–47. doi:10.1016/j.envpol.2009.10.036.
- [28] W.-J. Sim, J.-W. Lee, E.-S. Lee, S.-K. Shin, S.-R. Hwang, J.-E. Oh, Occurrence and distribution of pharmaceuticals in wastewater from households, livestock farms, hospitals and pharmaceutical manufactures., *Chemosphere.* 82 (2011) 179–86.  
doi:10.1016/j.chemosphere.2010.10.026.
- [29] M. Seifrtová, A. Pena, C.M. Lino, P. Solich, Determination of fluoroquinolone antibiotics in hospital and municipal wastewaters in Coimbra by liquid chromatography with a monolithic column and fluorescence detection., *Anal. Bioanal. Chem.* 391 (2008) 799–805.  
doi:10.1007/s00216-008-2020-1.
- [30] R. Rosal, A. Rodríguez, J.A. Perdigón-Melón, A. Petre, E. García-Calvo, M.J. Gómez, A. Agüera, A.R. Fernández-Alba, Occurrence of emerging pollutants in urban wastewater and their removal through biological treatment followed by ozonation., *Water Res.* 44 (2010) 578–88. doi:10.1016/j.watres.2009.07.004.
- [31] R.H. Lindberg, P. Wennberg, M.I. Johansson, M. Tysklind, B.A. V Andersson, Screening of Human Antibiotic Substances and Determination of Weekly Mass Flows in Five Sewage Treatment Plants in Sweden., *Environ. Sci. Technol.* 39 (2005) 3421–3429.  
doi:10.1021/es048143z.
- [32] K.G. Karthikeyan, M.T. Meyer, Occurrence of antibiotics in wastewater treatment facilities in Wisconsin, USA., *Sci. Total*



- Environ. 361 (2006) 196–207. doi:10.1016/j.scitotenv.2005.06.030.
- [33] Y. Luo, W. Guo, H.H. Ngo, L.D. Nghiem, F.I. Hai, J. Zhang, S. Liang, X.C. Wang, A review on the occurrence of micropollutants in the aquatic environment and their fate and removal during wastewater treatment., *Sci. Total Environ.* 473–474 (2014) 619–641. doi:10.1016/j.scitotenv.2013.12.065.
- [34] S. Matongo, G. Birungi, B. Moodley, P. Ndungu, Occurrence of selected pharmaceuticals in water and sediment of Umgeni River, KwaZulu-Natal, South Africa., *Environ. Sci. Pollut. Res.* 22 (2015) 10298–10308. doi:10.1007/s11356-015-4217-0.
- [35] B. Kasprzyk-Hordern, R.M. Dinsdale, A.J. Guwy, The removal of pharmaceuticals, personal care products, endocrine disruptors and illicit drugs during wastewater treatment and its impact on the quality of receiving waters., *Water Res.* 43 (2009) 363–380. doi:10.1016/j.watres.2008.10.047.
- [36] B. Petrie, R. Barden, B. Kasprzyk-Hordern, A review on emerging contaminants in wastewaters and the environment: Current knowledge, understudied areas and recommendations for future monitoring., *Water Res.* 72 (2014) 3–27. doi:10.1016/j.watres.2014.08.053.
- [37] P. Gao, Y. Ding, H. Li, I. Xagorarakis, Occurrence of pharmaceuticals in a municipal wastewater treatment plant: mass balance and removal processes., *Chemosphere.* 88 (2012) 17–24. doi:10.1016/j.chemosphere.2012.02.017.
- [38] M. Stumpf, T.A. Ternes, R.D. Wilken, S. V Rodrigues, W. Baumann, Polar drug residues in sewage and natural waters in the state of Rio de Janeiro, Brazil., *Sci. Total Environ.* 225 (1999) 135–41. doi:10.1016/S0048-9697(98)00339-8.
- [39] Q. Sui, J. Huang, S. Deng, W. Chen, G. Yu, Seasonal variation in the occurrence and removal of pharmaceuticals and personal care products in different biological wastewater treatment processes., *Environ. Sci. Technol.* 45 (2011) 3341–8. doi:10.1021/es200248d.
- [40] C.I. Kosma, D.A. Lambropoulou, T.A. Albanis, Investigation of PPCPs in wastewater treatment plants in Greece: Occurrence, removal and environmental risk assessment., *Sci. Total Environ.* 466–467 (2014) 421–438. doi:10.1016/j.scitotenv.2013.07.044.
- [41] J.A. Rivera-Jaimes, C. Postigo, R.M. Melgoza-Alemán, J. Aceña, D.

- Barceló, M. López de Alda, Study of pharmaceuticals in surface and wastewater from Cuernavaca, Morelos, Mexico: Occurrence and environmental risk assessment, *Sci. Total Environ.* 613–614 (2018) 1263–1274. doi:10.1016/j.scitotenv.2017.09.134.
- [42] E. Carmona, V. Andreu, Y. Picó, Occurrence of acidic pharmaceuticals and personal care products in Turia River Basin: from waste to drinking water., *Sci. Total Environ.* 484 (2014) 53–63. doi:10.1016/j.scitotenv.2014.02.085.
- [43] D.R. Baker, B. Kasprzyk-Hordern, Spatial and temporal occurrence of pharmaceuticals and illicit drugs in the aqueous environment and during wastewater treatment: New developments., *Sci. Total Environ.* 454–455 (2013) 442–456. doi:10.1016/j.scitotenv.2013.03.043.
- [44] H.-B. Lee, T.E. Peart, M.L. Svoboda, Determination of endocrine-disrupting phenols, acidic pharmaceuticals, and personal-care products in sewage by solid-phase extraction and gas chromatography-mass spectrometry., *J. Chromatogr. A.* 1094 (2005) 122–9. doi:10.1016/j.chroma.2005.07.070.
- [45] Q. Sun, M. Lv, A. Hu, X. Yang, C.-P. Yu, Seasonal variation in the occurrence and removal of pharmaceuticals and personal care products in a wastewater treatment plant in Xiamen, China., *J. Hazard. Mater.* (2013). doi:10.1016/j.jhazmat.2013.11.056.
- [46] Q. Sun, M. Li, C. Ma, X. Chen, X. Xie, C.P. Yu, Seasonal and spatial variations of PPCP occurrence, removal and mass loading in three wastewater treatment plants located in different urbanization areas in Xiamen, China., *Environ. Pollut.* 208 (2016) 371–381. doi:10.1016/j.envpol.2015.10.003.
- [47] S.K. Behera, H.W. Kim, J.-E. Oh, H.-S. Park, Occurrence and removal of antibiotics, hormones and several other pharmaceuticals in wastewater treatment plants of the largest industrial city of Korea., *Sci. Total Environ.* 409 (2011) 4351–60. doi:10.1016/j.scitotenv.2011.07.015.
- [48] D. Bendz, N. a Paxéus, T.R. Ginn, F.J. Loge, Occurrence and fate of pharmaceutically active compounds in the environment, a case study: Höje River in Sweden., *J. Hazard. Mater.* 122 (2005) 195–204. doi:10.1016/j.jhazmat.2005.03.012.
- [49] X.-S. Miao, C.D. Metcalfe, Determination of cholesterol-lowering statin drugs in aqueous samples using liquid chromatography–electrospray ionization tandem mass spectrometry., *J. Chromatogr. A.*

998 (2003) 133–141. doi:10.1016/S0021-9673(03)00645-9.

- [50] F.F. Al-Qaim, M.P. Abdullah, M.R. Othman, J. Latip, Z. Zakaria, Multi-residue analytical methodology-based liquid chromatography-time-of-flight-mass spectrometry for the analysis of pharmaceutical residues in surface water and effluents from sewage treatment plants and hospitals., *J. Chromatogr. A.* 1345 (2014) 139–53. doi:10.1016/j.chroma.2014.04.025.
- [51] M. Boisvert, P.B. Fayad, S. Sauvé, Development of a new multi-residue laser diode thermal desorption atmospheric pressure chemical ionization tandem mass spectrometry method for the detection and quantification of pesticides and pharmaceuticals in wastewater samples., *Anal. Chim. Acta.* 754 (2012) 75–82. doi:10.1016/j.aca.2012.09.046.
- [52] N. Nakada, T. Tanishima, H. Shinohara, K. Kiri, H. Takada, Pharmaceutical chemicals and endocrine disrupters in municipal wastewater in Tokyo and their removal during activated sludge treatment., *Water Res.* 40 (2006) 3297–303. doi:10.1016/j.watres.2006.06.039.
- [53] R. Salgado, J.P. Noronha, A. Oehmen, G. Carvalho, M.A.M. Reis, Analysis of 65 pharmaceuticals and personal care products in 5 wastewater treatment plants in Portugal using a simplified analytical methodology., *Water Sci. Technol.* 62 (2010) 2862. doi:10.2166/wst.2010.985.
- [54] M.J. Gómez, M.J. Martínez Bueno, S. Lacorte, A.R. Fernández-Alba, A. Agüera, Pilot survey monitoring pharmaceuticals and related compounds in a sewage treatment plant located on the Mediterranean coast., *Chemosphere.* 66 (2007) 993–1002. doi:10.1016/j.chemosphere.2006.07.051.
- [55] A. Lajeunesse, C. Gagnon, S. Sauvé, Determination of Basic Antidepressants and Their N-Desmethyl Metabolites in Raw Sewage and Wastewater Using Solid-Phase Extraction and Liquid Chromatography-Tandem Mass Spectrometry., *Anal. Chem.* 80 (2008) 5325–5333. doi:10.1021/ac800162q.
- [56] T. Vasskog, U. Berger, P.-J. Samuelsen, R. Kallenborn, E. Jensen, Selective serotonin reuptake inhibitors in sewage influents and effluents from Tromsø, Norway., *J. Chromatogr. A.* 1115 (2006) 187–195. doi:10.1016/j.chroma.2006.02.091.
- [57] T. Vasskog, T. Anderssen, S. Pedersen-Bjergaard, R. Kallenborn, E.

- Jensen, Occurrence of selective serotonin reuptake inhibitors in sewage and receiving waters at Spitsbergen and in Norway., *J. Chromatogr. A.* 1185 (2008) 194–205.  
doi:10.1016/j.chroma.2008.01.063.
- [58] V. Koutsouba, T. Heberer, B. Fuhrmann, K. Schmidt-Baumler, D. Tsiipi, A. Hiskia, Determination of polar pharmaceuticals in sewage water of Greece by gas chromatography-mass spectrometry., *Chemosphere.* 51 (2003) 69–75. doi:10.1016/S0045-6535(02)00819-6.
- [59] V.G. Samaras, A.S. Stasinakis, D. Mamais, N.S. Thomaidis, T.D. Lekkas, Fate of selected pharmaceuticals and synthetic endocrine disrupting compounds during wastewater treatment and sludge anaerobic digestion., *J. Hazard. Mater.* 244–245 (2013) 259–267. doi:10.1016/j.jhazmat.2012.11.039.
- [60] J.-Y. Paillet, A. Krein, L. Pfister, L. Hoffmann, C. Guignard, Solid phase extraction coupled to liquid chromatography-tandem mass spectrometry analysis of sulfonamides, tetracyclines, analgesics and hormones in surface water and wastewater in Luxembourg., *Sci. Total Environ.* 407 (2009) 4736–4743. doi:10.1016/j.scitotenv.2009.04.042.
- [61] L.H.M.L.M. Santos, A.N. Araújo, A. Fachini, A. Pena, C. Delerue-Matos, M.C.B.S.M. Montenegro, Ecotoxicological aspects related to the presence of pharmaceuticals in the aquatic environment., *J. Hazard. Mater.* 175 (2010) 45–95. doi:10.1016/j.jhazmat.2009.10.100.
- [62] M.D. Hernando, E. Heath, M. Petrovic, D. Barceló, Trace-level determination of pharmaceutical residues by LC-MS/MS in natural and treated waters. A pilot-survey study., *Anal. Bioanal. Chem.* 385 (2006) 985–991. doi:10.1007/s00216-006-0394-5.
- [63] A. Tauxe-Wuersch, L.F. De Alencastro, D. Grandjean, J. Tarradellas, Occurrence of several acidic drugs in sewage treatment plants in Switzerland and risk assessment., *Water Res.* 39 (2005) 1761–72. doi:10.1016/j.watres.2005.03.003.
- [64] L. Ferrando-Climent, N. Collado, G. Buttiglieri, M. Gros, I. Rodriguez-Roda, S. Rodriguez-Mozaz, D. Barceló, Comprehensive study of ibuprofen and its metabolites in activated sludge batch experiments and aquatic environment., *Sci. Total Environ.* 438 (2012) 404–413. doi:10.1016/j.scitotenv.2012.08.073.

- [65] S. Zuehlke, U. Duennbier, T. Heberer, Determination of estrogenic steroids in surface water and wastewater by liquid chromatography-electrospray tandem mass spectrometry., *J. Sep. Sci.* 28 (2005) 52–58. doi:10.1002/jssc.200301727.
- [66] A.C. Johnson, R.J. Williams, A Model To Estimate Influent and Effluent Concentrations of Estradiol, Estrone, and Ethinylestradiol at Sewage Treatment Works., *Environ. Sci. Technol.* 38 (2004) 3649–3658. doi:10.1021/es035342u.
- [67] A. Laganà, A. Bacaloni, I. De Leva, A. Faberi, G. Fago, A. Marino, Analytical methodologies for determining the occurrence of endocrine disrupting chemicals in sewage treatment plants and natural waters., *Anal. Chim. Acta.* 501 (2004) 79–88. doi:10.1016/j.aca.2003.09.020.
- [68] R. Loos, R. Carvalho, D.C. António, S. Comero, G. Locoro, S. Tavazzi, B. Paracchini, M. Ghiani, T. Lettieri, L. Blaha, B. Jarosova, S. Voorspoels, K. Servaes, P. Haglund, J. Fick, R.H. Lindberg, D. Schwesig, B.M. Gawlik, EU-wide monitoring survey on emerging polar organic contaminants in wastewater treatment plant effluents., *Water Res.* 47 (2013) 6475–87. doi:10.1016/j.watres.2013.08.024.
- [69] M.S. Kostich, A.L. Batt, J.M. Lazorchak, Concentrations of prioritized pharmaceuticals in effluents from 50 large wastewater treatment plants in the US and implications for risk estimation., *Environ. Pollut.* 184 (2014) 354–359. doi:10.1016/j.envpol.2013.09.013.
- [70] P. Verlicchi, A. Galletti, M. Petrovic, D. Barceló, M. Al Aukidy, E. Zambello, Removal of selected pharmaceuticals from domestic wastewater in an activated sludge system followed by a horizontal subsurface flow bed - Analysis of their respective contributions., *Sci. Total Environ.* 454–455 (2013) 411–425. doi:10.1016/j.scitotenv.2013.03.044.
- [71] M. Al Aukidy, P. Verlicchi, A. Jelic, M. Petrovic, D. Barcelò, Monitoring release of pharmaceutical compounds: Occurrence and environmental risk assessment of two WWTP effluents and their receiving bodies in the Po Valley, Italy., *Sci. Total Environ.* 438 (2012) 15–25. doi:10.1016/j.scitotenv.2012.08.061.
- [72] S. Grujić, T. Vasiljević, M. Laušević, Determination of multiple pharmaceutical classes in surface and ground waters by liquid chromatography-ion trap-tandem mass spectrometry., *J. Chromatogr. A.* 1216 (2009) 4989–5000. doi:10.1016/j.chroma.2009.04.059.

- [73] M.J.M. Bueno, M.J. Gomez, S. Herrera, M.D. Hernando, A. Agüera, A.R. Fernández-Alba, Occurrence and persistence of organic emerging contaminants and priority pollutants in five sewage treatment plants of Spain: two years pilot survey monitoring., *Environ. Pollut.* 164 (2012) 267–73. doi:10.1016/j.envpol.2012.01.038.
- [74] A.D. McEachran, D. Shea, W. Bodnar, E.G. Nichols, Pharmaceutical occurrence in groundwater and surface waters in forests land-applied with municipal wastewater., *Environ. Toxicol. Chem.* 35 (2016) 898–905. doi:10.1002/etc.3216.
- [75] W.C. Li, Occurrence, sources, and fate of pharmaceuticals in aquatic environment and soil., *Environ. Pollut.* 187C (2014) 193–201. doi:10.1016/j.envpol.2014.01.015.
- [76] A. Chiffre, F. Degiorgi, A. Buleté, L. Spinner, P.M. Badot, Occurrence of pharmaceuticals in WWTP effluents and their impact in a karstic rural catchment of Eastern France, *Environ. Sci. Pollut. Res.* 23 (2016) 25427–25441. doi:10.1007/s11356-016-7751-5.
- [77] J. Fick, H. Söderström, Contamination of surface, ground, and drinking water from pharmaceutical production., *Environ. Toxicol. Chem.* 28 (2009) 2522–2527. [http://en.cnki.com.cn/Article\\_en/CJFDTOTAL-HXJZ2009Z1013.htm](http://en.cnki.com.cn/Article_en/CJFDTOTAL-HXJZ2009Z1013.htm) (accessed November 5, 2013).
- [78] L. Mijangos, H. Ziarrusta, O. Ros, L. Kortazar, L.A. Fernández, M. Olivares, O. Zuloaga, A. Prieto, N. Etxebarria, Occurrence of emerging pollutants in estuaries of the Basque Country: Analysis of sources and distribution, and assessment of the environmental risk, *Water Res.* 147 (2018) 152–163. doi:10.1016/j.watres.2018.09.033.
- [79] S.D. Kim, J. Cho, I.S. Kim, B.J. Vanderford, S.A. Snyder, Occurrence and removal of pharmaceuticals and endocrine disruptors in South Korean surface, drinking, and waste waters., *Water Res.* 41 (2007) 1013–1021. doi:10.1016/j.watres.2006.06.034.
- [80] C. Nebot, R. Falcon, K.G. Boyd, S.W. Gibb, Introduction of human pharmaceuticals from wastewater treatment plants into the aquatic environment: a rural perspective., *Environ. Sci. Pollut. Res.* 14 (2015) 10559–10568. doi:10.1007/s11356-015-4234-z.
- [81] M.J. Hilton, K. V Thomas, Determination of selected human pharmaceutical compounds in effluent and surface water samples by high-performance liquid chromatography–electrospray tandem mass

- spectrometry., *J. Chromatogr. A.* 1015 (2003) 129–141.  
doi:10.1016/S0021-9673(03)01213-5.
- [82] M.J.M. Bueno, A. Agüera, M.D. Hernando, M.J. Gómez, A.R. Fernández-Alba, Evaluation of various liquid chromatography-quadrupole-linear ion trap-mass spectrometry operation modes applied to the analysis of organic pollutants in wastewaters., *J. Chromatogr. A.* 1216 (2009) 5995–6002.  
doi:10.1016/j.chroma.2009.06.047.
- [83] S.S. Verenitch, C.J. Lowe, A. Mazumder, Determination of acidic drugs and caffeine in municipal wastewaters and receiving waters by gas chromatography-ion trap tandem mass spectrometry., *J. Chromatogr. A.* 1116 (2006) 193–203.  
doi:10.1016/j.chroma.2006.03.005.
- [84] G. McEneff, L. Barron, B. Kelleher, B. Paull, B. Quinn, A year-long study of the spatial occurrence and relative distribution of pharmaceutical residues in sewage effluent, receiving marine waters and marine bivalves., *Sci. Total Environ.* 476–477 (2014) 317–326.  
doi:10.1016/j.scitotenv.2013.12.123.
- [85] J. Corcoran, M.J. Winter, C.R. Tyler, Pharmaceuticals in the aquatic environment: a critical review of the evidence for health effects in fish., *Crit. Rev. Toxicol.* 40 (2010) 287–304.  
doi:10.3109/10408440903373590.
- [86] A. Daneshvar, J. Svanfelt, L. Kronberg, M. Prévost, G.A. Weyhenmeyer, Seasonal variations in the occurrence and fate of basic and neutral pharmaceuticals in a Swedish river-lake system., *Chemosphere.* 80 (2010) 301–9.  
doi:10.1016/j.chemosphere.2010.03.060.
- [87] B. Subedi, N. Codru, D.M. Dziewulski, L.R. Wilson, J. Xue, S. Yun, E. Braun-Howland, C. Minihane, K. Kannan, A pilot study on the assessment of trace organic contaminants including pharmaceuticals and personal care products from on-site wastewater treatment systems along Skaneateles Lake in New York State, USA., *Water Res.* 72 (2014) 28–39. doi:10.1016/j.watres.2014.10.049.
- [88] B.A. Crouse, A.J. Ghoshdastidar, A.Z. Tong, The presence of acidic and neutral drugs in treated sewage effluents and receiving waters in the Cornwallis and Annapolis River watersheds and the Mill Cove Sewage Treatment Plant in Nova Scotia, Canada., *Environ. Res.* 112 (2012) 92–9. doi:10.1016/j.envres.2011.11.011.

- [89] T. Isobe, H. Shiraishi, M. Yasuda, A. Shinoda, H. Suzuki, M. Morita, Determination of estrogens and their conjugates in water using solid-phase extraction followed by liquid chromatography-tandem mass spectrometry., *J. Chromatogr. A.* 984 (2003) 195–202. doi:10.1016/S0021-9673(02)01851-4.
- [90] C.M.O. Gonçalves, M.A.D. Sousa, M. de F.P.S.P. Alpendurada, Analysis of acidic, basic and neutral pharmaceuticals in river waters: Clean-up by 1°, 2° amino anion exchange and enrichment using an hydrophilic adsorbent, *Int. J. Environ. Anal. Chem.* 93 (2013) 1–22. doi:10.1080/03067319.2012.702272.
- [91] P. Reis-Santos, M. Pais, B. Duarte, I. Caçador, A. Freitas, A.S. Vila Pouca, J. Barbosa, S. Leston, J. Rosa, F. Ramos, H.N. Cabral, B.M. Gillanders, V.F. Fonseca, Screening of human and veterinary pharmaceuticals in estuarine waters: A baseline assessment for the Tejo estuary, *Mar. Pollut. Bull.* 135 (2018) 1079–1084. doi:10.1016/j.marpolbul.2018.08.036.
- [92] E. Vulliet, C. Cren-Olivé, M.-F. Grenier-Loustalot, Occurrence of pharmaceuticals and hormones in drinking water treated from surface waters., *Environ. Chem. Lett.* 9 (2009) 103–114. doi:10.1007/s10311-009-0253-7.
- [93] R. López-Serna, M. Petrović, D. Barceló, Direct analysis of pharmaceuticals, their metabolites and transformation products in environmental waters using on-line TurboFlow™ chromatography-liquid chromatography-tandem mass spectrometry., *J. Chromatogr. A.* 1252 (2012) 115–29. doi:10.1016/j.chroma.2012.06.078.
- [94] B. Huerta, S. Rodriguez-Mozaz, C. Nannou, L. Nakis, A. Ruhí, V. Acuña, S. Sabater, D. Barcelo, Determination of a broad spectrum of pharmaceuticals and endocrine disruptors in biofilm from a waste water treatment plant-impacted river., *Sci. Total Environ.* 540 (2016) 241–249. doi:10.1016/j.scitotenv.2015.05.049.
- [95] R. Zhang, G. Zhang, Q. Zheng, J. Tang, Y. Chen, W. Xu, Y. Zou, X. Chen, Occurrence and risks of antibiotics in the Laizhou Bay, China: Impacts of river discharge., *Ecotoxicol. Environ. Saf.* 80 (2012) 208–215. doi:10.1016/j.ecoenv.2012.03.002.
- [96] Q. Bu, B. Wang, J. Huang, S. Deng, G. Yu, Pharmaceuticals and personal care products in the aquatic environment in China: A review., *J. Hazard. Mater.* 262 (2013) 189–211. doi:10.1016/j.jhazmat.2013.08.040.



- [97] M. Ivešić, A. Krivohlavek, I. Žuntar, S. Tolić, S. Šikić, V. Musić, I. Pavlić, A. Bursik, N. Galić, Monitoring of selected pharmaceuticals in surface waters of Croatia, *Environ. Sci. Pollut. Res.* 24 (2017) 23389–23400. doi:10.1007/s11356-017-9894-4.
- [98] T. Christian, R.J. Schneider, H.A. Färber, D. Skutlarek, M.T. Meyer, H.E. Goldbach, Determination of antibiotic residues in manure, soil, and surface waters., *Acta Hydrochim. Hydrobiol.* 31 (2003) 36–44. doi:10.1002/ahch.200390014.
- [99] P. a. Segura, H. Takada, J. a. Correa, K. El Saadi, T. Koike, S. Onwona-Agyeman, J. Ofosu-Anim, E.B. Sabi, O. V. Wasonga, J.M. Mghalu, A.M. dos Santos, B. Newman, S. Weerts, V. Yargeau, Global occurrence of anti-infectives in contaminated surface waters: Impact of income inequality between countries., *Environ. Int.* 80 (2015) 89–97. doi:10.1016/j.envint.2015.04.001.
- [100] S.R. Hughes, L.E. Brown, P. Kay, Global Synthesis and Critical Evaluation of Pharmaceutical Data Sets Collected from River Systems., *Environ. Sci. Technol.* 47 (2013) 661–677. <http://pubs.acs.org/doi/abs/10.1021/es3030148>.
- [101] S. Managaki, A. Murata, H. Takada, C.T. Bui, N.H. Chiem, Distribution of macrolides, sulfonamides, and trimethoprim in tropical waters: Ubiquitous occurrence of veterinary antibiotics in the Mekong Delta., *Environ. Sci. Technol.* 41 (2007) 8004–8010. doi:10.1021/es0709021.
- [102] G.A. Khan, B. Berglund, K.M. Khan, P.E. Lindgren, J. Fick, Occurrence and Abundance of Antibiotics and Resistance Genes in Rivers, Canal and near Drug Formulation Facilities - A Study in Pakistan., *PLoS One.* 8 (2013) 4–11. doi:10.1371/journal.pone.0062712.
- [103] A. Ginebreda, I. Muñoz, M.L. Alda, R. Brix, J. López-Doval, D. Barceló, Environmental risk assessment of pharmaceuticals in rivers: Relationships between hazard indexes and aquatic macroinvertebrate diversity indexes in the Llobregat River (NE Spain), *Environ. Int.* 36 (2010) 153–162. doi:10.1016/j.envint.2009.10.003.
- [104] M.J. Focazio, D.W. Kolpin, K.K. Barnes, E.T. Furlong, M.T. Meyer, S.D. Zaugg, L.B. Barber, M.E. Thurman, A national reconnaissance for pharmaceuticals and other organic wastewater contaminants in the United States - II) Untreated drinking water sources., *Sci. Total Environ.* 402 (2008) 201–216. doi:10.1016/j.scitotenv.2008.02.021.

- [105] T.L. Jones-Lepp, C. Sanchez, D.A. Alvarez, D.C. Wilson, R.L. Taniguchi-Fu, Point sources of emerging contaminants along the Colorado River Basin: Source water for the arid Southwestern United States., *Sci. Total Environ.* 430 (2012) 237–245. doi:10.1016/j.scitotenv.2012.04.053.
- [106] B.D. Blair, J.P. Crago, C.J. Hedman, R.D. Klaper, Pharmaceuticals and personal care products found in the Great Lakes above concentrations of environmental concern., *Chemosphere.* 93 (2013) 2116–2123. doi:10.1016/j.chemosphere.2013.07.057.
- [107] P.T.P. Hoa, S. Managaki, N. Nakada, H. Takada, A. Shimizu, D.H. Anh, P.H. Viet, S. Suzuki, Antibiotic contamination and occurrence of antibiotic-resistant bacteria in aquatic environments of northern Vietnam., *Sci. Total Environ.* 409 (2011) 2894–2901. doi:10.1016/j.scitotenv.2011.04.030.
- [108] C. Wu, X. Huang, J.D. Witter, A.L. Spongberg, K. Wang, D. Wang, J. Liu, Occurrence of pharmaceuticals and personal care products and associated environmental risks in the central and lower Yangtze river, China., *Ecotoxicol. Environ. Saf.* 106 (2014) 19–26. doi:10.1016/j.ecoenv.2014.04.029.
- [109] D. Calamari, E. Zuccato, S. Castiglioni, R. Bagnati, R. Fanelli, Strategic Survey of Therapeutic Drugs in the Rivers Po and Lambro in Northern Italy, *Environ. Sci. Technol.* 37 (2003) 1241–1248. doi:10.1021/es020158e.
- [110] J.-W. Kim, H.-S. Jang, J.-G. Kim, H. Ishibashi, M. Hirano, K. Nasu, N. Ichikawa, Y. Takao, R. Shinohara, K. Arizono, Occurrence of Pharmaceutical and Personal Care Products (PPCPs) in Surface Water from Mankyung River, South Korea., *J. Heal. Sci.* 55 (2009) 249–258. doi:10.1248/jhs.55.249.
- [111] T.W. Na, T.W. Kang, K.H. Lee, S.H. Hwang, H.J. Jung, K. Kim, Distribution and ecological risk of pharmaceuticals in surface water of the Yeongsan river, Republic of Korea, *Ecotoxicol. Environ. Saf.* 181 (2019) 180–186. doi:10.1016/j.ecoenv.2019.06.004.
- [112] V. de J. Gaffney, C.M.M. Almeida, A. Rodrigues, E. Ferreira, M.J. Benoiel, V.V. Cardoso, Occurrence of pharmaceuticals in a water supply system and related human health risk assessment., *Water Res.* 72 (2015) 199–208. doi:10.1016/j.watres.2014.10.027.
- [113] S. Kleywegt, V. Pileggi, P. Yang, C. Hao, X. Zhao, C. Rocks, S. Thach, P. Cheung, B. Whitehead, Pharmaceuticals, hormones and

- bisphenol A in untreated source and finished drinking water in Ontario, Canada — occurrence and treatment efficiency., *Sci. Total Environ.* 409 (2011) 1481–8. doi:10.1016/j.scitotenv.2011.01.010.
- [114] S. Mokh, M. El Khatib, M. Koubar, Z. Daher, M. Al Iskandarani, Innovative SPE-LC-MS/MS technique for the assessment of 63 pharmaceuticals and the detection of antibiotic-resistant-bacteria: A case study natural water sources in Lebanon, *Sci. Total Environ.* 609 (2017) 830–841. doi:10.1016/j.scitotenv.2017.07.230.
- [115] A. Pena, D. Chmielova, C.M. Lino, P. Solich, Determination of fluoroquinolone antibiotics in surface waters from Mondego River by high performance liquid chromatography using a monolithic column, *J. Sep. Sci.* 30 (2007) 2924–2928. doi:10.1002/jssc.200700363.
- [116] D.W. Kolpin, E.T. Furlong, M.T. Meyer, E.M. Thurman, S.D. Zaugg, L.B. Barber, H.T. Buxton, Pharmaceuticals, hormones, and other organic wastewater contaminants in U.S. streams, 1999-2000: A national reconnaissance., *Environ. Sci. Technol.* 36 (2002) 1202–1211. doi:10.1021/es011055j.
- [117] S. Mompelat, B. Le Bot, O. Thomas, Occurrence and fate of pharmaceutical products and by-products, from resource to drinking water., *Environ. Int.* 35 (2009) 803–14. doi:10.1016/j.envint.2008.10.008.
- [118] D. Simazaki, R. Kubota, T. Suzuki, M. Akiba, T. Nishimura, S. Kunikane, Occurrence of selected pharmaceuticals at drinking water purification plants in Japan and implications for human health., *Water Res.* 76 (2015) 187–200. doi:10.1016/j.watres.2015.02.059.
- [119] C.M. de Jongh, P.J.F. Kooij, P. de Voogt, T.L. ter Laak, Screening and human health risk assessment of pharmaceuticals and their transformation products in Dutch surface waters and drinking water., *Sci. Total Environ.* 427–428 (2012) 70–7. doi:10.1016/j.scitotenv.2012.04.010.
- [120] R. López-Roldán, M.L. de Alda, M. Gros, M. Petrovic, J. Martín-Alonso, D. Barceló, Advanced monitoring of pharmaceuticals and estrogens in the Llobregat River basin (Spain) by liquid chromatography-triple quadrupole-tandem mass spectrometry in combination with ultra performance liquid chromatography-time of flight-mass spectrometry., *Chemosphere.* 80 (2010) 1337–44. doi:10.1016/j.chemosphere.2010.06.042.
- [121] A. Ginebreda, M. Kuzmanovic, H. Guasch, M.L. de Alda, J.C.

- López-Doval, I. Muñoz, M. Ricart, A.M. Romani, S. Sabater, D. Barceló, Assessment of multi-chemical pollution in aquatic ecosystems using toxic units: compound prioritization, mixture characterization and relationships with biological descriptors., *Sci. Total Environ.* 468–469 (2014) 715–723. doi:10.1016/j.scitotenv.2013.08.086.
- [122] A.Y.C. Lin, Y.T. Tsai, Occurrence of pharmaceuticals in Taiwan's surface waters: Impact of waste streams from hospitals and pharmaceutical production facilities., *Sci. Total Environ.* 407 (2009) 3793–3802. doi:10.1016/j.scitotenv.2009.03.009.
- [123] U. Kunkel, M. Radke, Fate of pharmaceuticals in rivers: Deriving a benchmark dataset at favorable attenuation conditions., *Water Res.* 46 (2012) 5551–5565. doi:10.1016/j.watres.2012.07.033.
- [124] Z. Li, A. Sobek, M. Radke, Fate of pharmaceuticals and their transformation products in four small European rivers receiving treated wastewater., *Environ. Sci. Technol.* (2016) acs.est.5b06327. doi:10.1021/acs.est.5b06327.
- [125] J.L. Zhao, G.G. Ying, L. Wang, J.F. Yang, X.B. Yang, L.H. Yang, X. Li, Determination of phenolic endocrine disrupting chemicals and acidic pharmaceuticals in surface water of the Pearl Rivers in South China by gas chromatography-negative chemical ionization-mass spectrometry., *Sci. Total Environ.* 407 (2009) 962–974. doi:10.1016/j.scitotenv.2008.09.048.
- [126] M. Lv, Q. Sun, A. Hu, L. Hou, J. Li, X. Cai, C.-P. Yu, Pharmaceuticals and personal care products in a mesoscale subtropical watershed and their application as sewage markers., *J. Hazard. Mater.* 280 (2014) 696–705. doi:10.1016/j.jhazmat.2014.08.054.
- [127] M.J. Benotti, R.A. Trenholm, B.J. Vanderford, J.C. Holady, B.D. Stanford, S.A. Snyder, Pharmaceuticals and endocrine disrupting compounds in U.S. drinking water., *Environ. Sci. Technol.* 43 (2009) 597–603. doi:10.1021/es801845a.
- [128] M.G. Cantwell, D.R. Katz, J.C. Sullivan, D. Shapley, J. Lipscomb, J. Epstein, A.R. Juhl, C. Knudson, G.D. O'Mullan, Spatial patterns of pharmaceuticals and wastewater tracers in the Hudson River Estuary, *Water Res.* 137 (2018) 335–343. doi:10.1016/j.watres.2017.12.044.
- [129] A. Hossain, S. Nakamichi, M. Habibullah-Al-Mamun, K. Tani, S. Masunaga, H. Matsuda, Occurrence and ecological risk of

- pharmaceuticals in river surface water of Bangladesh, *Environ. Res.* 165 (2018) 258–266. doi:10.1016/j.envres.2018.04.030.
- [130] M. Schriks, M.B. Heringa, M.M.E. Van der Kooi, P. de Voogt, A.P. Van Wezel, Toxicological relevance of emerging contaminants for drinking water quality., *Water Res.* 44 (2010) 461–76. doi:10.1016/j.watres.2009.08.023.
- [131] T.V. Madureira, J.C. Barreiro, M.J. Rocha, E. Rocha, Q.B. Cass, M.E. Tiritan, Spatiotemporal distribution of pharmaceuticals in the Douro River estuary (Portugal)., *Sci. Total Environ.* 408 (2010) 5513–20. doi:10.1016/j.scitotenv.2010.07.069.
- [132] S. Weigel, R. Kallenborn, H. Hühnerfuss, Simultaneous solid-phase extraction of acidic, neutral and basic pharmaceuticals from aqueous samples at ambient (neutral) pH and their determination by gas chromatography-mass spectrometry., *J. Chromatogr. A.* 1023 (2004) 183–195. doi:10.1016/j.chroma.2003.10.036.
- [133] B.P. Gumbi, B. Moodley, G. Birungi, P.G. Ndungu, Detection and quantification of acidic drug residues in South African surface water using gas chromatography-mass spectrometry, *Chemosphere.* 168 (2017) 1042–1050. doi:10.1016/j.chemosphere.2016.10.105.
- [134] L.H.M.L.M. Santos, P. Paíga, A.N. Araújo, A. Pena, C. Delerue-Matos, M.C.B.S.M. Montenegro, Development of a simple analytical method for the simultaneous determination of paracetamol, paracetamol-glucuronide and p-aminophenol in river water., *J. Chromatogr. B. Analyt. Technol. Biomed. Life Sci.* 930 (2013) 75–81. doi:10.1016/j.jchromb.2013.04.032.
- [135] L. Yang, T. Luan, C. Lan, Solid-phase microextraction with on-fiber silylation for simultaneous determinations of endocrine disrupting chemicals and steroid hormones by gas chromatography-mass spectrometry., *J. Chromatogr. A.* 1104 (2006) 23–32. doi:10.1016/j.chroma.2005.11.108.
- [136] E. Vulliet, L. Wiest, R. Baudot, M.F. Grenier-Loustalot, Multi-residue analysis of steroids at sub-ng/L levels in surface and groundwaters using liquid chromatography coupled to tandem mass spectrometry., *J. Chromatogr. A.* 1210 (2008) 84–91. doi:10.1016/j.chroma.2008.09.034.
- [137] O.S. Olatunji, O.S. Fatoki, B.O. Opeolu, B.J. Ximba, R. Chitongo, Determination of selected steroid hormones in some surface water around animal farms in Cape Town using HPLC-DAD, *Environ.*

Monit. Assess. 189 (2017). doi:10.1007/s10661-017-6070-8.

- [138] R. López-Serna, A. Jurado, E. Vázquez-Suñé, J. Carrera, M. Petrović, D. Barceló, Occurrence of 95 pharmaceuticals and transformation products in urban groundwaters underlying the metropolis of Barcelona, Spain., *Environ. Pollut.* 174 (2013) 305–315. doi:10.1016/j.envpol.2012.11.022.
- [139] C. Afonso-Olivares, M. Torres-Padrón, Z. Sosa-Ferrera, J. Santana-Rodríguez, Assessment of the Presence of Pharmaceutical Compounds in Seawater Samples from Coastal Area of Gran Canaria Island (Spain)., *Antibiotics.* 2 (2013) 274–287. doi:10.3390/antibiotics2020274.
- [140] K.K. Barnes, D.W. Kolpin, E.T. Furlong, S.D. Zaugg, M.T. Meyer, L.B. Barber, A national reconnaissance of pharmaceuticals and other organic wastewater contaminants in the United States — I) Groundwater., *Sci. Total Environ.* 402 (2008) 192–200. doi:10.1016/j.scitotenv.2008.04.028.
- [141] J. Magnér, M. Filipovic, T. Alsberg, Application of a novel solid-phase-extraction sampler and ultra-performance liquid chromatography quadrupole-time-of-flight mass spectrometry for determination of pharmaceutical residues in surface sea water., *Chemosphere.* 80 (2010) 1255–60. doi:10.1016/j.chemosphere.2010.06.065.
- [142] F. Sacher, F.T. Lange, H.-J. Brauch, I. Blankenhorn, Pharmaceuticals in groundwaters., *J. Chromatogr. A.* 938 (2001) 199–210. doi:10.1016/S0021-9673(01)01266-3.
- [143] M.S. Fram, K. Belitz, Occurrence and concentrations of pharmaceutical compounds in groundwater used for public drinking-water supply in California., *Sci. Total Environ.* 409 (2011) 3409–17. doi:10.1016/j.scitotenv.2011.05.053.
- [144] F. Riva, S. Castiglioni, E. Fattore, A. Manenti, E. Davoli, E. Zuccato, Monitoring emerging contaminants in the drinking water of Milan and assessment of the human risk, *Int. J. Hyg. Environ. Health.* 221 (2018) 451–457. doi:10.1016/j.ijheh.2018.01.008.
